# Supplementary material for: Peripheral Blood-Based DNA Methylation of Long Non-Coding RNA H19 and Metastasis-Associated Lung Adenocarcinoma Transcript 1 Promoters are Potential Non-Invasive Biomarkers for Gastric Cancer Detection
Source: PubMed Central journal article supplement — Cancer Control. 2021 Oct 6;28:10732748211043667. doi: 10.1177/10732748211043667 (PMC8504648; doi:10.1177/10732748211043667), 2021-10-06
Supplement: sj-pdf-1-ccx-10.1177_10732748211043667.pdf [file sj-pdf-1-ccx-10.1177_10732748211043667.pdf]

**Table S1. The position and primer sequences of the 7 CpG regions of H19 and MALAT1 promoters**

| Regions                  | Chr <sup>a</sup> | Gene       | TSS <sup>b</sup> | Start    | End      | Length | Distance <sup>c</sup> | Primer sequences               |                                     |
|--------------------------|------------------|------------|------------------|----------|----------|--------|-----------------------|--------------------------------|-------------------------------------|
|                          |                  |            |                  |          |          |        |                       | Forward sequence               | Reverse sequence                    |
| H19A                     | 11               | H19        | 2019105          | 2019782  | 2019585  | 198    | -677                  | GTTTGGGAGAGTTTGT<br>GAGGT      | ACCRATTCCCATCCAATTA<br>ACC          |
| H19B                     | 11               | H19        | 2019105          | 2018197  | 2017978  | 220    | 908                   | AGGTAGTGTTYGGGGA<br>GTTGTAG    | ACCAAACCAACCCCAAAA<br>AC            |
| H19C                     | 11               | H19        | 2019105          | 2017992  | 2017753  | 240    | 1113                  | TGGGGTTGGTTTGGTA<br>GATAG      | TCTCCAACCCRAACRCTA<br>AAACA         |
| H19D <sup>d</sup>        | 11               | H19        | 2019105          | 2019951  | 2020241  | 291    | -1136                 | GGAGTATTAGGGTTAA<br>GGGATTTAGA | AAACTAAACTCCACTTTT<br>AACAAAATATAAA |
| MALAT1<br>A              | 11               | MALA<br>T1 | 65265208         | 65263406 | 65263611 | 206    | -1802                 | GGTTGGGTATAGTGGT<br>TTAAGTTTG  | TAATTCAAACAATTCACTT<br>ACTCAAC      |
| MALAT1<br>B              | 11               | MALA<br>T1 | 65265208         | 65265040 | 65264855 | 186    | -353                  | GGTTTTAGTYGGTTTT<br>GGTYGTTTT  | AAAAACCAACCCCAAAT<br>ACA            |
| MALAT1<br>C <sup>d</sup> | 11               | MALA<br>T1 | 65265208         | 65262562 | 65262748 | 187    | -2646                 | TTGTYGTTTAGGTTGG<br>AGTGTAGTGA | CCAAACCAACCTATCCAA<br>CTTAATAAC     |

a: Chr Chromosome, b: TSS transcription start site, c: Distance CpG site relative distance (in bp) to TSS, d: H19D H19 CpG island shore, e: MALAT1C MALAT1 CpG island shore

**Table S2. The position of the 91 CpG sites of H19 and MALAT1 promoters**

| <b>CpG sites</b> | <b>Position</b> | <b>Chromosome</b> | <b>Genome Position</b> | <b>Distance</b> |
|------------------|-----------------|-------------------|------------------------|-----------------|
| H19a1            | 22              | 11                | 2019761                | -656            |
| H19a2            | 29              | 11                | 2019754                | -649            |
| H19a3            | 46              | 11                | 2019737                | -632            |
| H19a4            | 50              | 11                | 2019733                | -628            |
| H19a5            | 52              | 11                | 2019731                | -626            |
| H19a6            | 57              | 11                | 2019726                | -621            |
| H19a7            | 70              | 11                | 2019713                | -608            |
| H19a8            | 80              | 11                | 2019703                | -598            |
| H19a9            | 103             | 11                | 2019680                | -575            |
| H19a10           | 105             | 11                | 2019678                | -573            |
| H19a11           | 115             | 11                | 2019668                | -563            |
| H19a12           | 127             | 11                | 2019656                | -551            |
| H19a13           | 149             | 11                | 2019634                | -529            |
| H19a14           | 156             | 11                | 2019627                | -522            |
| H19a15           | 158             | 11                | 2019625                | -520            |
| H19a16           | 176             | 11                | 2019607                | -502            |
| H19b1            | 29              | 11                | 2018169                | 936             |
| H19b2            | 43              | 11                | 2018155                | 950             |
| H19b3            | 48              | 11                | 2018150                | 955             |
| H19b4            | 54              | 11                | 2018144                | 961             |
| H19b5            | 68              | 11                | 2018130                | 975             |
| H19b6            | 78              | 11                | 2018120                | 985             |
| H19b7            | 102             | 11                | 2018096                | 1009            |
| H19b8            | 109             | 11                | 2018089                | 1016            |
| H19b9            | 113             | 11                | 2018085                | 1020            |
| H19b10           | 116             | 11                | 2018082                | 1023            |
| H19b11           | 124             | 11                | 2018074                | 1031            |
| H19b12           | 134             | 11                | 2018064                | 1041            |
| H19b13           | 151             | 11                | 2018047                | 1058            |
| H19b14           | 179             | 11                | 2018019                | 1086            |
| H19b15           | 195             | 11                | 2018003                | 1102            |
| H19c1            | 53              | 11                | 2017940                | 1165            |
| H19c2            | 68              | 11                | 2017925                | 1180            |
| H19c3            | 73              | 11                | 2017920                | 1185            |
| H19c4            | 77              | 11                | 2017916                | 1189            |
| H19c5            | 82              | 11                | 2017911                | 1194            |
| H19c6            | 133             | 11                | 2017860                | 1245            |
| H19c7            | 138             | 11                | 2017855                | 1250            |
| H19c8            | 142             | 11                | 2017851                | 1254            |
| H19c9            | 145             | 11                | 2017848                | 1257            |
| H19c10           | 149             | 11                | 2017844                | 1261            |
| H19c11           | 173             | 11                | 2017820                | 1285            |

|           |     |    |          |       |
|-----------|-----|----|----------|-------|
| H19c12    | 184 | 11 | 2017809  | 1296  |
| H19c13    | 191 | 11 | 2017802  | 1303  |
| H19c14    | 193 | 11 | 2017800  | 1305  |
| H19c15    | 197 | 11 | 2017796  | 1309  |
| H19c16    | 200 | 11 | 2017793  | 1312  |
| H19c17    | 203 | 11 | 2017790  | 1315  |
| H19c18    | 209 | 11 | 2017784  | 1321  |
| H19c19    | 215 | 11 | 2017778  | 1327  |
| H19d1     | 32  | 11 | 2019982  | -877  |
| H19d2     | 78  | 11 | 2020028  | -923  |
| H19d3     | 80  | 11 | 2020030  | -925  |
| H19d4     | 86  | 11 | 2020036  | -931  |
| H19d5     | 115 | 11 | 2020065  | -960  |
| H19d6     | 151 | 11 | 2020101  | -996  |
| H19d7     | 154 | 11 | 2020104  | -999  |
| H19d8     | 164 | 11 | 2020114  | -1009 |
| H19d9     | 168 | 11 | 2020118  | -1013 |
| H19d10    | 179 | 11 | 2020129  | -1024 |
| MALAT1a1  | 48  | 11 | 65263453 | -1755 |
| MALAT1a2  | 53  | 11 | 65263458 | -1750 |
| MALAT1a3  | 57  | 11 | 65263462 | -1746 |
| MALAT1a4  | 64  | 11 | 65263469 | -1739 |
| MALAT1a5  | 98  | 11 | 65263503 | -1705 |
| MALAT1a6  | 138 | 11 | 65263543 | -1665 |
| MALAT1a7  | 142 | 11 | 65263547 | -1661 |
| MALAT1a8  | 150 | 11 | 65263555 | -1653 |
| MALAT1a9  | 154 | 11 | 65263559 | -1649 |
| MALAT1a10 | 174 | 11 | 65263579 | -1629 |
| MALAT1b1  | 28  | 11 | 65265013 | -195  |
| MALAT1b2  | 39  | 11 | 65265002 | -206  |
| MALAT1b3  | 46  | 11 | 65264995 | -213  |
| MALAT1b4  | 51  | 11 | 65264990 | -218  |
| MALAT1b5  | 53  | 11 | 65264988 | -220  |
| MALAT1b6  | 61  | 11 | 65264980 | -228  |
| MALAT1b7  | 65  | 11 | 65264976 | -232  |
| MALAT1b8  | 67  | 11 | 65264974 | -234  |
| MALAT1b9  | 69  | 11 | 65264972 | -236  |
| MALAT1b10 | 74  | 11 | 65264967 | -241  |
| MALAT1b11 | 82  | 11 | 65264959 | -249  |
| MALAT1b12 | 115 | 11 | 65264926 | -282  |
| MALAT1b13 | 143 | 11 | 65264898 | -310  |
| MALAT1b14 | 147 | 11 | 65264894 | -314  |
| MALAT1b15 | 157 | 11 | 65264884 | -324  |
| MALAT1c1  | 29  | 11 | 65262590 | -2618 |

|          |     |    |          |       |
|----------|-----|----|----------|-------|
| MALAT1c2 | 35  | 11 | 65262596 | -2612 |
| MALAT1c3 | 49  | 11 | 65262610 | -2598 |
| MALAT1c4 | 59  | 11 | 65262620 | -2588 |
| MALAT1c5 | 111 | 11 | 65262672 | -2536 |
| MALAT1c6 | 115 | 11 | 65262676 | -2532 |

---

**Table S3. Association between methylation levels of H19 or MALAT1 promoters in peripheral blood and GC risk among all participants\***

| Name           | Methylation level <sup>a</sup> |                    | Z-value | P-value                     | Logistic regression analysis |                |                             |
|----------------|--------------------------------|--------------------|---------|-----------------------------|------------------------------|----------------|-----------------------------|
|                | GC                             | HCs                |         |                             | Odds Ratio                   | 95%CI          | P-value                     |
| <b>Genes</b>   |                                |                    |         |                             |                              |                |                             |
| H19            | 76.61(75.71,77.44)             | 76.1(75.22,76.98)  | -2.735  | <b>0.006</b>                | 1.224                        | 1.029-1.455    | <b>0.022</b>                |
| MALAT1         | 8.86(8.68,9.05)                | 8.87(8.70,9.07)    | -0.18   | 0.857                       | 0.929                        | 0.389-2.218    | 0.868                       |
| <b>Regions</b> |                                |                    |         |                             |                              |                |                             |
| H19A           | 46.74(45.68,47.94)             | 46.75(45.60,47.90) | -0.022  | 0.982                       | 0.985                        | 0.882-1.100    | 0.788                       |
| H19B           | 92.88(91.67,94.65)             | 92.38(91.45,94.48) | -1.461  | 0.144                       | 1.085                        | 0.951-1.238    | 0.226                       |
| H19C           | 95.72(95.38,96.03)             | 95.36(94.95,95.72) | -5.285  | <b>1.25×10<sup>-7</sup></b> | 3.085                        | 1.868-5.094    | <b>1.10×10<sup>-5</sup></b> |
| H19D           | 63.04(58.89,66.90)             | 61.53(57.76,65.76) | -1.876  | 0.061                       | 1.032                        | 0.988-1.078    | 0.159                       |
| MALAT1A        | 21.03(20.5,21.51)              | 21.04(20.63,21.69) | -0.677  | 0.499                       | 0.884                        | 0.626-1.248    | 0.483                       |
| MALAT1B        | 0.75(0.69,0.80)                | 0.72(0.68,0.77)    | -2.25   | <b>0.024</b>                | 94.912                       | 3.629-2482.615 | <b>0.006</b>                |

|              |         |                    |                    |        |       |       |             |       |
|--------------|---------|--------------------|--------------------|--------|-------|-------|-------------|-------|
| <b>Sites</b> | MALATIC | 72.41(68.9,74.47)  | 72.53(69.15,75.37) | -1.05  | 0.294 | 0.967 | 0.919-1.018 | 0.205 |
|              | H19a1   | 43.17(41.77,44.92) | 42.86(41.95,43.95) | -1.458 | 0.145 | 1.058 | 0.953-1.176 | 0.292 |
|              | H19a2   | 44.23(43,45.97)    | 44.47(43.15,45.43) | -0.087 | 0.931 | 0.967 | 0.904-1.033 | 0.318 |
|              | H19a3   | 45.59(44.53,47.08) | 45.56(44.44,46.76) | -0.362 | 0.718 | 1.014 | 0.910-1.129 | 0.804 |
|              | H19a4   | 45.21(43.85,46.69) | 45.23(43.98,46.53) | -0.204 | 0.838 | 0.969 | 0.871-1.077 | 0.556 |
|              | H19a5   | 45.30(44.06,46.98) | 45.20(44.03,46.6)  | -0.285 | 0.776 | 0.998 | 0.901-1.106 | 0.970 |
|              | H19a6   | 45.65(44.55,47.24) | 45.77(44.35,46.72) | -0.552 | 0.581 | 1.015 | 0.913-1.128 | 0.786 |
|              | H19a7   | 45.67(44.43,47.19) | 45.66(44.68,46.71) | -0.004 | 0.996 | 0.977 | 0.903-1.057 | 0.561 |
|              | H19a8   | 46.42(45.11,47.89) | 46.69(45.24,47.68) | -0.406 | 0.685 | 0.988 | 0.886-1.101 | 0.826 |
|              | H19a9   | 47.25(46.10,48.65) | 47.51(46.05,48.59) | -0.059 | 0.953 | 0.996 | 0.891-1.112 | 0.938 |
|              | H19a10  | 47.34(46.31,48.67) | 47.35(46.30,48.51) | -0.365 | 0.715 | 1.012 | 0.907-1.130 | 0.828 |
|              | H19a11  | 47.49(46.31,48.72) | 47.63(46.05,48.71) | -0.039 | 0.969 | 0.991 | 0.890-1.102 | 0.864 |

|        |                    |                    |        |                             |       |             |                             |
|--------|--------------------|--------------------|--------|-----------------------------|-------|-------------|-----------------------------|
| H19a12 | 47.27(45.94,48.68) | 47.49(46.06,48.81) | -0.476 | 0.634                       | 0.963 | 0.873-1.062 | 0.446                       |
| H19a13 | 48.79(47.44,50.18) | 48.82(47.55,50.10) | -0.31  | 0.757                       | 0.979 | 0.881-1.087 | 0.685                       |
| H19a14 | 49.10(48.11,50.67) | 49.17(47.83,50.50) | -0.037 | 0.971                       | 0.977 | 0.884-1.080 | 0.653                       |
| H19a15 | 49.08(48.07,50.61) | 49.26(47.87,50.54) | -0.115 | 0.908                       | 0.996 | 0.896-1.108 | 0.948                       |
| H19a16 | 49.04(48.01,50.86) | 49.30(47.63,50.28) | -0.286 | 0.775                       | 0.993 | 0.893-1.103 | 0.892                       |
| H19b1  | 52.76(46.92,88.92) | 51.77(47.73,88.57) | -0.417 | 0.677                       | 1.001 | 0.991-1.010 | 0.861                       |
| H19b2  | 97.41(96.99,97.85) | 97.20(96.85,97.58) | -2.71  | <b>0.007</b>                | 2.000 | 1.275-3.137 | <b>0.003</b>                |
| H19b3  | 96.26(95.82,96.81) | 96.25(95.85,96.75) | -0.647 | 0.518                       | 1.302 | 0.926-1.829 | 0.129                       |
| H19b4  | 89.12(88.13,90.56) | 89.21(88.01,90.17) | -0.35  | 0.726                       | 0.975 | 0.909-1.046 | 0.477                       |
| H19b5  | 93.68(92.74,94.30) | 93.36(92.42,94.03) | -2.317 | <b>0.02</b>                 | 1.374 | 1.085-1.74) | <b>0.008</b>                |
| H19b6  | 97.97(97.62,98.32) | 97.87(97.49,98.09) | -2.365 | <b>0.018</b>                | 1.801 | 1.069-3.033 | <b>0.027</b>                |
| H19b7  | 92.45(91.29,93.30) | 91.77(90.48,92.49) | -4.081 | <b>4.50×10<sup>-5</sup></b> | 1.496 | 1.238-1.807 | <b>3.00×10<sup>-5</sup></b> |

|        |                    |                    |        |                             |       |             |                             |
|--------|--------------------|--------------------|--------|-----------------------------|-------|-------------|-----------------------------|
| H19b8  | 96.22(95.75,96.67) | 95.86(95.35,96.42) | -3.236 | <b>0.001</b>                | 1.487 | 1.099-2.012 | <b>0.01</b>                 |
| H19b9  | 94.60(93.77,95.54) | 94.18(92.82,95.04) | -3.535 | <b>4.08×10<sup>-4</sup></b> | 1.428 | 1.185-1.721 | <b>1.84×10<sup>-4</sup></b> |
| H19b10 | 97.38(96.95,97.8)  | 97.31(96.93,97.69) | -0.935 | 0.35                        | 1.153 | 0.770-1.726 | 0.489                       |
| H19b11 | 90.66(89.71,91.52) | 90.14(89.28,91.24) | -2.399 | <b>0.016</b>                | 1.203 | 1.019-1.419 | <b>0.029</b>                |
| H19b12 | 97.13(96.61,97.48) | 96.74(96.36,97.15) | -3.607 | <b>3.10×10<sup>-4</sup></b> | 2.001 | 1.336-2.998 | <b>0.001</b>                |
| H19b13 | 96.74(96.24,97.21) | 96.65(96.18,97.04) | -1.061 | 0.289                       | 1.295 | 0.904-1.856 | 0.159                       |
| H19b14 | 95.30(94.67,95.91) | 94.93(94.35,95.46) | -2.935 | <b>0.003</b>                | 1.324 | 1.058-1.658 | <b>0.014</b>                |
| H19b15 | 97.71(97.24,98.03) | 97.53(97.31,97.86) | -1.365 | 0.172                       | 1.268 | 0.804-1.998 | 0.307                       |
| H19c1  | 93.74(92.81,94.67) | 92.68(91.9,93.68)  | -4.845 | <b>1.00×10<sup>-6</sup></b> | 1.503 | 1.255-1.800 | <b>9.00×10<sup>-6</sup></b> |
| H19c2  | 86.69(84.89,88.78) | 85.27(83.62,87.49) | -3.571 | <b>3.55×10<sup>-4</sup></b> | 1.184 | 1.073-1.306 | <b>0.001</b>                |
| H19c3  | 95.85(94.94,96.54) | 94.96(93.97,95.9)  | -4.082 | <b>4.50×10<sup>-5</sup></b> | 1.453 | 1.201-1.757 | <b>1.20×10<sup>-4</sup></b> |
| H19c4  | 95.63(94.78,96.43) | 94.95(94.02,95.69) | -4.105 | <b>4.00×10<sup>-5</sup></b> | 1.399 | 1.145-1.710 | <b>0.001</b>                |



|        |                    |                    |        |                             |       |             |              |
|--------|--------------------|--------------------|--------|-----------------------------|-------|-------------|--------------|
| H19c5  | 96.34(95.55,96.94) | 95.81(95.18,96.36) | -3.648 | <b>2.64×10<sup>-4</sup></b> | 1.535 | 1.186-1.987 | <b>0.001</b> |
| H19c6  | 97.02(96.40,97.66) | 96.8(96.17,97.18)  | -2.551 | <b>0.011</b>                | 1.276 | 0.991-1.644 | 0.059        |
| H19c7  | 97.94(97.37,98.40) | 97.76(97.45,98.23) | -1.004 | 0.315                       | 1.056 | 0.778-1.434 | 0.725        |
| H19c8  | 96.99(96.5,97.67)  | 96.57(96.14,97.05) | -3.904 | <b>9.40×10<sup>-5</sup></b> | 1.355 | 1.069-1.719 | <b>0.012</b> |
| H19c9  | 93.61(92.61,94.44) | 92.98(92.06,93.88) | -2.99  | <b>0.003</b>                | 0.998 | 0.944-1.055 | 0.943        |
| H19c10 | 96.80(96.22,97.44) | 96.61(96.04,97.09) | -2.429 | <b>0.015</b>                | 1.300 | 1.001-1.688 | <b>0.049</b> |
| H19c11 | 89.52(87.83,91.19) | 89.43(87.96,90.48) | -0.931 | 0.352                       | 1.049 | 0.929-1.184 | 0.439        |
| H19c12 | 97.5(97.09,98.03)  | 97.29(96.89,97.88) | -1.697 | 0.09                        | 1.236 | 0.950-1.608 | 0.114        |
| H19c13 | 98.00(97.53,98.58) | 97.96(97.67,98.27) | -0.606 | 0.544                       | 1.104 | 0.799-1.526 | 0.548        |
| H19c14 | 98.41(98.01,98.79) | 98.34(98.05,98.76) | -0.511 | 0.609                       | 0.997 | 0.722-1.377 | 0.987        |
| H19c15 | 98.16(97.75,98.52) | 98.18(97.75,98.56) | -0.376 | 0.707                       | 0.973 | 0.667-1.417 | 0.885        |
| H19c16 | 97.63(97.11,98.02) | 97.55(97.15,98.06) | -0.545 | 0.586                       | 1.025 | 0.760-1.383 | 0.869        |
| H19c17 | 97.67(97.26,98.08) | 97.65(97.11,97.99) | -1.174 | 0.24                        | 1.211 | 0.901-1.629 | 0.205        |
| H19c18 | 95.04(94.09,95.69) | 94.68(94.01,95.39) | -1.401 | 0.161                       | 1.074 | 0.959-1.204 | 0.218        |
| H19c19 | 97.19(96.61,97.59) | 97.07(96.5,97.54)  | -1.15  | 0.25                        | 1.124 | 0.836-1.512 | 0.439        |

|          |                    |                    |        |              |       |             |              |
|----------|--------------------|--------------------|--------|--------------|-------|-------------|--------------|
| H19d1    | 52.67(47.20,57.14) | 50.00(45.54,55.48) | -2.355 | <b>0.019</b> | 1.031 | 0.998-1.065 | 0.063        |
| H19d2    | 52.47(48.19,57.10) | 52.31(47.67,56.78) | -0.403 | 0.687        | 1.003 | 0.969-1.037 | 0.882        |
| H19d3    | 53.00(49.11,57.06) | 52.55(48.71,56.29) | -0.402 | 0.688        | 0.997 | 0.962-1.034 | 0.874        |
| H19d4    | 52.40(49.18,56.46) | 51.62(48.00,56.11) | -0.932 | 0.351        | 1.011 | 0.974-1.049 | 0.580        |
| H19d5    | 53.72(49.58,57.96) | 53.88(49.31,57.62) | -0.142 | 0.887        | 0.995 | 0.960-1.032 | 0.806        |
| H19d6    | 82.48(78.51,87.10) | 80.37(76.76,84.83) | -2.335 | <b>0.02</b>  | 1.049 | 1.007-1.094 | <b>0.022</b> |
| H19d7    | 73.55(69.14,79.42) | 72.48(68.02,76.48) | -1.528 | 0.126        | 1.018 | 0.986-1.052 | 0.272        |
| H19d8    | 70.66(65.50,76.87) | 68.63(63.94,73.20) | -2.327 | <b>0.02</b>  | 1.037 | 1.004-1.072 | <b>0.029</b> |
| H19d9    | 76.82(71.17,82.47) | 74.51(70.21,79.43) | -2.142 | <b>0.032</b> | 1.040 | 1.004-1.078 | <b>0.031</b> |
| H19d10   | 62.04(56.65,66.67) | 60.6(55.51,65.15)  | -1.318 | 0.187        | 1.020 | 0.987-1.054 | 0.243        |
| MALAT1a1 | 33.17(31.82,34.49) | 32.92(31.73,34.66) | -0.755 | 0.45         | 1.036 | 0.918-1.170 | 0.564        |
| MALAT1a2 | 26.13(24.90,27.37) | 26.35(25.16,27.69) | -0.957 | 0.339        | 0.945 | 0.832-1.074 | 0.388        |
| MALAT1a3 | 20.16(18.92,21.10) | 19.97(18.72,21.04) | -0.373 | 0.709        | 1.024 | 0.891-1.177 | 0.736        |
| MALAT1a4 | 12.36(11.53,13.42) | 12.56(11.58,13.21) | -0.356 | 0.722        | 0.973 | 0.815-1.162 | 0.764        |

|           |                    |                    |        |                             |       |             |                             |
|-----------|--------------------|--------------------|--------|-----------------------------|-------|-------------|-----------------------------|
| MALAT1a5  | 4.94(4.46,5.51)    | 5.45(4.82,6.06)    | -3.91  | <b>9.20×10<sup>-5</sup></b> | 0.584 | 0.436-0.782 | <b>3.11×10<sup>-4</sup></b> |
| MALAT1a6  | 19.77(18.73,21.11) | 19.80(19.00,21.09) | -0.833 | 0.405                       | 0.927 | 0.802-1.072 | 0.307                       |
| MALAT1a7  | 25.71(24.63,26.78) | 25.70(24.76,27.17) | -0.489 | 0.625                       | 0.976 | 0.849-1.122 | 0.730                       |
| MALAT1a8  | 21.53(20.35,22.56) | 21.50(20.4,22.59)  | -0.282 | 0.778                       | 0.979 | 0.852-1.125 | 0.766                       |
| MALAT1a9  | 19.82(18.77,20.88) | 19.16(18.07,20.68) | -1.946 | 0.052                       | 1.141 | 0.995-1.307 | 0.058                       |
| MALAT1a10 | 26.55(25.19,27.69) | 26.91(25.76,28.07) | -1.445 | 0.148                       | 0.935 | 0.822-1.064 | 0.310                       |
| MALAT1b1  | 0.63(0.47,0.85)    | 0.65(0.51,0.83)    | -0.478 | 0.632                       | 0.910 | 0.367-2.259 | 0.839                       |
| MALAT1b2  | 0.53(0.41,0.72)    | 0.55(0.43,0.72)    | -0.569 | 0.57                        | 1.006 | 0.393-2.570 | 0.991                       |
| MALAT1b3  | 0.73(0.54,0.90)    | 0.75(0.60,0.89)    | -0.719 | 0.472                       | 1.001 | 0.420-2.383 | 0.999                       |
| MALAT1b4  | 0.69(0.48,0.92)    | 0.66(0.51,0.81)    | -1.072 | 0.284                       | 2.004 | 0.855-4.701 | 0.110                       |
| MALAT1b5  | 0.69(0.54,0.88)    | 0.65(0.47,0.83)    | -1.326 | 0.185                       | 2.009 | 0.754-5.352 | 0.163                       |
| MALAT1b6  | 0.71(0.51,0.92)    | 0.75(0.55,0.90)    | -0.652 | 0.515                       | 1.083 | 0.502-2.338 | 0.839                       |
| MALAT1b7  | 0.73(0.56,0.91)    | 0.76(0.55,0.88)    | -0.053 | 0.958                       | 1.316 | 0.591-2.934 | 0.502                       |
| MALAT1b8  | 0.79(0.6,1.00)     | 0.84(0.59,1.01)    | -0.32  | 0.749                       | 0.852 | 0.365-1.989 | 0.711                       |

|           |                    |                    |        |              |       |             |              |
|-----------|--------------------|--------------------|--------|--------------|-------|-------------|--------------|
| MALAT1b9  | 0.76(0.54,0.92)    | 0.66(0.52,0.82)    | -1.947 | 0.052        | 3.210 | 1.250-8.244 | <b>0.015</b> |
| MALAT1b10 | 0.73(0.52,0.93)    | 0.69(0.54,0.89)    | -0.738 | 0.46         | 1.649 | 0.739-3.677 | 0.222        |
| MALAT1b11 | 0.52(0.35,0.76)    | 0.53(0.37,0.66)    | -0.166 | 0.868        | 1.695 | 0.698-4.117 | 0.244        |
| MALAT1b12 | 1.40(1.13,1.65)    | 1.27(1.06,1.56)    | -2.082 | <b>0.037</b> | 1.874 | 0.971-3.618 | 0.061        |
| MALAT1b13 | 0.55(0.35,0.71)    | 0.51(0.37,0.75)    | -0.019 | 0.985        | 1.082 | 0.424-2.760 | 0.869        |
| MALAT1b14 | 0.70(0.52,0.84)    | 0.69(0.57,0.84)    | -0.089 | 0.929        | 1.190 | 0.432-3.277 | 0.737        |
| MALAT1b15 | 0.70(0.53,0.86)    | 0.72(0.58,0.85)    | -0.545 | 0.586        | 1.349 | 0.648-2.809 | 0.424        |
| MALAT1c1  | 69.14(65.82,71.42) | 69.64(66.93,72.13) | -1.237 | 0.216        | 0.959 | 0.903-1.019 | 0.176        |
| MALAT1c2  | 74.01(70.91,76.58) | 74.47(71.43,77.31) | -1.018 | 0.309        | 0.977 | 0.926-1.030 | 0.387        |
| MALAT1c3  | 67.32(62.61,70.36) | 67.90(63.67,71.72) | -1.263 | 0.207        | 0.970 | 0.934-1.008 | 0.116        |
| MALAT1c4  | 69.94(66.31,71.92) | 69.90(66.66,73.50) | -1.085 | 0.278        | 0.969 | 0.925-1.016 | 0.190        |
| MALAT1c5  | 75.56(72.07,78.30) | 75.81(72.71,78.66) | -1.141 | 0.254        | 0.974 | 0.930-1.021 | 0.271        |
| MALAT1c6  | 79.74(77.16,82.34) | 80.26(77.44,82.58) | -0.656 | 0.512        | 0.976 | 0.922-1.032 | 0.391        |

\*Adjusted for age and gender; a: Methylation level is expressed as a percentage. Data was expressed as median (P<sub>25</sub>, P<sub>75</sub>). GC: gastric cancer, HCs: healthy controls.

**Table S4. Association between methylation levels of H19 or MALAT1 promoters in peripheral blood and GC risk in female patients and controls\***

|                | Name    | Methylation level <sup>a</sup> |                    | Logistic regression analysis |                        |              |
|----------------|---------|--------------------------------|--------------------|------------------------------|------------------------|--------------|
|                |         | GC                             | HCs                | Odds Ratio                   | 95%CI                  | P-value      |
| <b>Genes</b>   | H19     | 76.97(76.13,77.84)             | 76.07(75.24,76.94) | 1.587                        | 1.038-2.425            | <b>0.033</b> |
|                | MALAT1  | 8.84(8.66,8.96)                | 8.87(8.70,9.05)    | 0.559                        | 0.062-5.016            | 0.603        |
| <b>Regions</b> | H19A    | 46.75(45.99,47.31)             | 46.57(45.1,47.35)  | 1.063                        | 0.794-1.423            | 0.681        |
|                | H19B    | 94.10(92.09,94.79)             | 92.29(91.34,94.51) | 1.311                        | 0.976-1.761            | 0.072        |
|                | H19C    | 95.78(95.55,96.14)             | 95.45(95.10,95.91) | 5.039                        | 1.416-17.926           | <b>0.013</b> |
|                | H19D    | 65.12(62.27,68.82)             | 61.27(57.51,66.57) | 1.048                        | 0.966-1.137            | 0.261        |
|                | MALAT1A | 20.81(20.48,21.26)             | 21.03(20.73,21.44) | 0.584                        | 0.250-1.364            | 0.214        |
|                | MALAT1B | 0.78(0.72,0.84)                | 0.70(0.68,0.76)    | 8824087.00<br>0              | 6.428-12113612<br>.022 | <b>0.014</b> |
|                | MALAT1C | 70.72(66.47,73.13)             | 72.37(67.69,74.52) | 0.955                        | 0.879-1.038            | 0.281        |
| <b>Sites</b>   | H19a1   | 43.49(42.46,44.71)             | 42.8(41.61,44.04)  | 1.471                        | 1.039-2.084            | <b>0.030</b> |
|                | H19a2   | 44.68(43.22,45.30)             | 44.63(42.94,45.28) | 0.959                        | 0.859-1.071            | 0.456        |
|                | H19a3   | 45.82(45.16,46.77)             | 45.69(44.22,46.43) | 1.279                        | 0.916-1.787            | 0.149        |
|                | H19a4   | 45.58(44.63,46.07)             | 45.02(43.67,46.04) | 1.192                        | 0.881-1.613            | 0.255        |
|                | H19a5   | 45.63(44.59,46.61)             | 45.39(43.79,46.03) | 1.079                        | 0.843-1.383            | 0.545        |
|                | H19a6   | 45.84(45.09,47.14)             | 45.9(43.96,46.37)  | 1.257                        | 0.926-1.706            | 0.143        |
|                | H19a7   | 46.05(44.96,46.57)             | 45.44(44.5,46.48)  | 1.233                        | 0.893-1.703            | 0.203        |
|                | H19a8   | 46.45(45.49,47.42)             | 46.46(45.22,47.3)  | 1.102                        | 0.796-1.525            | 0.559        |

|        |                    |                    |       |             |              |
|--------|--------------------|--------------------|-------|-------------|--------------|
| H19a9  | 47.05(46.20,48.57) | 47.28(45.51,48.31) | 1.042 | 0.792-1.370 | 0.771        |
| H19a10 | 47.44(46.51,48.37) | 47.17(45.22,47.89) | 1.112 | 0.842-1.469 | 0.454        |
| H19a11 | 47.54(46.53,48.2)  | 47.27(45.39,48.09) | 1.069 | 0.808-1.414 | 0.640        |
| H19a12 | 47.21(45.67,48.15) | 47.30(45.78,48.15) | 0.949 | 0.784-1.15) | 0.595        |
| H19a13 | 48.77(47.28,49.56) | 48.76(47.00,49.79) | 0.995 | 0.771-1.285 | 0.971        |
| H19a14 | 49.08(48.28,50.10) | 48.91(47.42,50.06) | 0.989 | 0.803-1.216 | 0.913        |
| H19a15 | 48.93(47.68,49.95) | 48.49(47.32,50.25) | 1.019 | 0.788-1.318 | 0.887        |
| H19a16 | 48.70(47.96,50.40) | 48.93(47.39,50.16) | 0.972 | 0.762-1.241 | 0.821        |
| H19b1  | 86.55(49.13,89.11) | 50.35(45.09,88.66) | 1.013 | 0.993-1.033 | 0.208        |
| H19b2  | 97.49(97.20,97.98) | 97.24(96.85,97.50) | 4.057 | 1.348-12.21 | <b>0.013</b> |
| H19b3  | 96.40(95.95,96.98) | 96.29(95.91,96.99) | 1.698 | 0.851-3.392 | 0.133        |
| H19b4  | 88.89(88.24,90.98) | 89.58(88.95,89.98) | 0.897 | 0.671-1.200 | 0.465        |
| H19b5  | 93.82(92.82,94.66) | 93.22(92.24,94.12) | 1.671 | 1.050-2.661 | <b>0.030</b> |
| H19b6  | 97.89(97.53,98.27) | 97.83(97.56,98.02) | 1.387 | 0.440-4.370 | 0.577        |
| H19b7  | 92.33(90.96,92.71) | 91.94(90.42,92.48) | 1.494 | 0.963-2.317 | 0.073        |
| H19b8  | 96.32(96.03,96.82) | 95.78(95.34,96.47) | 1.822 | 0.952-3.489 | 0.070        |
| H19b9  | 94.50(93.88,95.42) | 94.18(92.78,95.15) | 1.506 | 1.012-2.239 | <b>0.043</b> |
| H19b10 | 97.42(96.98,97.78) | 97.35(97.03,97.66) | 1.313 | 0.552-3.122 | 0.538        |
| H19b11 | 90.95(90.13,92.10) | 90.35(89.47,91.38) | 1.264 | 0.902-1.770 | 0.174        |
| H19b12 | 97.39(96.90,97.71) | 96.85(96.54,97.47) | 2.704 | 1.139-6.416 | <b>0.024</b> |

|        |                    |                    |       |             |              |
|--------|--------------------|--------------------|-------|-------------|--------------|
| H19b13 | 96.52(96.14,97.13) | 96.85(96.40,97.39) | 0.700 | 0.341-1.437 | 0.330        |
| H19b14 | 95.50(94.28,96.29) | 95.03(94.64,95.61) | 1.245 | 0.826-1.877 | 0.294        |
| H19b15 | 97.59(97.21,98.01) | 97.50(97.17,97.81) | 1.489 | 0.582-3.806 | 0.406        |
| H19c1  | 93.66(93.08,94.73) | 92.51(92.03,93.87) | 1.356 | 0.950-1.934 | 0.093        |
| H19c2  | 87.07(84.85,88.86) | 85.62(83.58,87.74) | 1.353 | 1.071-1.711 | <b>0.011</b> |
| H19c3  | 96.02(95.31,96.61) | 95.39(94.07,96.1)  | 1.891 | 1.173-3.049 | <b>0.009</b> |
| H19c4  | 95.61(94.64,96.48) | 94.95(93.78,95.55) | 1.729 | 1.084-2.759 | <b>0.022</b> |
| H19c5  | 96.29(95.16,97.00) | 96.10(95.17,96.64) | 1.291 | 0.813-2.051 | 0.279        |
| H19c6  | 96.80(95.99,97.53) | 96.86(96.64,97.13) | 1.012 | 0.587-1.747 | 0.965        |
| H19c7  | 97.92(97.43,98.23) | 97.56(97.46,98.13) | 1.364 | 0.685-2.719 | 0.377        |
| H19c8  | 97.21(96.52,98.13) | 96.75(96.31,97.17) | 1.686 | 0.985-2.885 | 0.057        |
| H19c9  | 93.57(92.72,94.38) | 93.13(92.42,93.97) | 1.217 | 0.810-1.827 | 0.345        |
| H19c10 | 97.02(96.35,97.57) | 96.77(96.29,97.13) | 1.686 | 0.933-3.049 | 0.084        |
| H19c11 | 89.90(87.57,91.06) | 89.75(88.41,90.74) | 0.917 | 0.710-1.182 | 0.503        |
| H19c12 | 97.53(97.22,98.05) | 97.59(96.65,97.92) | 1.218 | 0.687-2.159 | 0.499        |
| H19c13 | 97.98(97.51,98.60) | 97.95(97.8,98.25)  | 1.091 | 0.513-2.323 | 0.820        |
| H19c14 | 98.57(98.14,98.93) | 98.32(98.00,98.71) | 2.955 | 1.060-8.239 | <b>0.038</b> |
| H19c15 | 98.30(97.66,98.53) | 98.37(97.74,98.6)  | 0.950 | 0.426-2.118 | 0.900        |
| H19c16 | 97.63(97.00,98.13) | 97.55(97.14,98.04) | 1.028 | 0.599-1.763 | 0.920        |
| H19c17 | 97.60(97.27,98.14) | 97.85(97.10,98.13) | 1.072 | 0.589-1.950 | 0.820        |
| H19c18 | 95.14(94.07,95.94) | 94.57(94.27,95.28) | 1.166 | 0.778-1.748 | 0.457        |
| H19c19 | 97.17(96.59,97.74) | 97.05(96.50,97.39) | 1.379 | 0.744-2.557 | 0.307        |
| H19d1  | 55.01(51.74,59.32) | 50.00(45.10,55.56) | 1.082 | 1.006-1.163 | <b>0.034</b> |
| H19d2  | 54.58(48.76,57.23) | 50.56(47.13,57.38) | 1.012 | 0.960-1.068 | 0.654        |

|           |                    |                    |       |              |              |
|-----------|--------------------|--------------------|-------|--------------|--------------|
| H19d3     | 54.60(50.82,57.35) | 51.35(48.62,56.38) | 1.009 | 0.943-1.079  | 0.795        |
| H19d4     | 53.77(49.30,56.60) | 50.00(47.22,56.38) | 1.011 | 0.946-1.080  | 0.747        |
| H19d5     | 54.63(51.12,58.63) | 53.42(48.89,59.30) | 1.011 | 0.945-1.082  | 0.743        |
| H19d6     | 85.92(79.72,89.11) | 82.73(78.48,87.91) | 1.050 | 0.968-1.139  | 0.238        |
| H19d7     | 76.77(70.70,80.00) | 73.41(70.07,76.84) | 1.006 | 0.952-1.063  | 0.832        |
| H19d8     | 73.01(66.67,81.17) | 68.87(63.92,75.68) | 1.055 | 0.992-1.123  | 0.089        |
| H19d9     | 79.63(74.77,84.69) | 75.29(71.96,80.65) | 1.061 | 0.985-1.142  | 0.117        |
| H19d10    | 65.30(58.74,68.51) | 61.63(54.64,67.74) | 1.026 | 0.970-1.085  | 0.373        |
| MALAT1a1  | 32.69(31.52,34.18) | 33.30(31.91,34.75) | 0.882 | 0.681-1.143  | 0.343        |
| MALAT1a2  | 26.58(24.60,28.72) | 27.34(25.55,28.17) | 0.954 | 0.742-1.227  | 0.716        |
| MALAT1a3  | 19.70(18.45,20.73) | 20.08(18.47,20.90) | 0.954 | 0.705-1.291  | 0.760        |
| MALAT1a4  | 12.06(11.38,12.78) | 12.31(11.57,12.82) | 0.849 | 0.540-1.336  | 0.480        |
| MALAT1a5  | 4.64(4.26,5.64)    | 5.34(4.79,5.67)    | 0.504 | 0.266-0.955  | <b>0.036</b> |
| MALAT1a6  | 19.23(18.55,20.69) | 19.98(18.77,21.31) | 0.863 | 0.625-1.190  | 0.369        |
| MALAT1a7  | 25.55(24.87,26.70) | 25.87(25.20,27.12) | 0.935 | 0.659-1.326  | 0.705        |
| MALAT1a8  | 21.14(20.13,22.17) | 21.19(20.16,22.47) | 0.99  | 0.735-1.334  | 0.946        |
| MALAT1a9  | 20.01(18.81,20.89) | 19.07(18.17,20.75) | 1.066 | 0.783-1.449  | 0.686        |
| MALAT1a10 | 26.25(25.19,27.53) | 26.63(26.06,27.31) | 0.974 | 0.724-1.311  | 0.864        |
| MALAT1b1  | 0.66(0.51,0.90)    | 0.62(0.49,0.81)    | 2.408 | 0.275-21.087 | 0.427        |
| MALAT1b2  | 0.55(0.41,0.72)    | 0.54(0.39,0.64)    | 1.478 | 0.167-13.067 | 0.725        |
| MALAT1b3  | 0.73(0.53,1.10)    | 0.78(0.66,0.94)    | 1.106 | 0.251-4.878  | 0.894        |
| MALAT1b4  | 0.66(0.45,0.97)    | 0.66(0.55,0.82)    | 1.520 | 0.562-4.1080 | 0.410        |
| MALAT1b5  | 0.62(0.53,0.84)    | 0.75(0.62,0.88)    | 0.682 | 0.132-3.530  | 0.648        |
| MALAT1b6  | 0.75(0.48,1.02)    | 0.68(0.52,0.88)    | 1.708 | 0.447-6.520  | 0.434        |



|           |                    |                    |       |              |              |
|-----------|--------------------|--------------------|-------|--------------|--------------|
| MALAT1b7  | 0.66(0.49,0.85)    | 0.68(0.54,0.90)    | 0.962 | 0.171-5.403  | 0.965        |
| MALAT1b8  | 0.78(0.65,0.98)    | 0.88(0.68,0.97)    | 0.464 | 0.075-2.860  | 0.408        |
| MALAT1b9  | 0.79(0.53,1.06)    | 0.68(0.50,0.87)    | 3.905 | 0.815-18.710 | 0.088        |
| MALAT1b10 | 0.78(0.51,1.17)    | 0.64(0.55,0.76)    | 2.314 | 0.576-9.288  | 0.237        |
| MALAT1b11 | 0.47(0.24,0.78)    | 0.60(0.51,0.68)    | 0.954 | 0.305-2.988  | 0.936        |
| MALAT1b12 | 1.52(1.23,1.73)    | 1.25(1.02,1.34)    | 7.919 | 1.604-39.106 | <b>0.011</b> |
| MALAT1b13 | 0.60(0.27,0.75)    | 0.43(0.31,0.76)    | 3.184 | 0.518-19.574 | 0.211        |
| MALAT1b14 | 0.71(0.56,0.94)    | 0.65(0.60,0.83)    | 3.201 | 0.473-21.634 | 0.233        |
| MALAT1b15 | 0.70(0.51,1.03)    | 0.68(0.54,0.76)    | 2.540 | 0.589-10.947 | 0.211        |
| MALAT1c1  | 67.38(64.50,70.62) | 68.05(65.82,71.13) | 0.959 | 0.866-1.062  | 0.419        |
| MALAT1c2  | 71.56(68.96,75.24) | 73.57(69.12,78.27) | 0.960 | 0.881-1.046  | 0.350        |
| MALAT1c3  | 65.12(59.30,68.76) | 67.03(61.66,70.74) | 0.956 | 0.897-1.019  | 0.168        |
| MALAT1c4  | 68.49(65.12,71.04) | 69.03(64.84,73.53) | 0.960 | 0.887-1.038  | 0.303        |
| MALAT1c5  | 73.29(70.05,76.48) | 74.04(69.90,78.66) | 0.972 | 0.905-1.043  | 0.426        |
| MALAT1c6  | 79.24(76.60,81.42) | 79.60(76.76,82.45) | 0.961 | 0.876-1.055  | 0.403        |

\*Adjusted for age. a: Methylation level is expressed as a percentage. Data was expressed as median (P<sub>25</sub>, P<sub>75</sub>). GC: gastric cancer, HCs: healthy controls.

**Table S5. Association between methylation levels of H19 or MALAT1 promoters in peripheral blood and GC risk in male patients and controls\***

| Name           | Methylation level <sup>a</sup> |                    | Logistic regression analysis |             |         |
|----------------|--------------------------------|--------------------|------------------------------|-------------|---------|
|                | GC                             | HCs                | Odds Ratio                   | 95%CI       | P-value |
| <b>Genes</b>   |                                |                    |                              |             |         |
| H19            | 76.55(75.26,77.39)             | 76.13(75.15,77.08) | 1.154                        | 0.954-1.397 | 0.140   |
| MALAT1         | 8.90(8.70,9.06)                | 8.88(8.69,9.11)    | 1.034                        | 0.399-2.679 | 0.946   |
| <b>Regions</b> |                                |                    |                              |             |         |
| H19A           | 46.71(45.55,48.19)             | 46.78(45.75,47.98) | 0.972                        | 0.863-1.096 | 0.644   |

|              |         |                    |                    |        |              |                  |
|--------------|---------|--------------------|--------------------|--------|--------------|------------------|
|              | H19B    | 92.69(91.60,94.53) | 92.45(91.53,94.47) | 1.032  | 0.889-1.198  | 0.679            |
|              | H19C    | 95.67(95.33,96.01) | 95.33(94.9,95.64)  | 2.852  | 1.646-4.944  | <b>1.87×10-4</b> |
|              | H19D    | 63.01(58.43,66.31) | 61.93(57.86,65.14) | 1.026  | 0.973-1.081  | 0.340            |
|              | MALAT1A | 21.15(20.61,21.6)  | 21.05(20.57,21.74) | 0.967  | 0.661-1.414  | 0.861            |
|              | MALAT1B | 0.74(0.69,0.78)    | 0.73(0.68,0.77)    | 18.524 | 0.415-826.39 | 0.132            |
|              | MALAT1C | 72.88(69.77,74.76) | 72.55(70.28,75.4)  | 0.976  | 0.914-1.041  | 0.459            |
| <b>Sites</b> | H19a1   | 43.11(41.35,44.93) | 42.89(41.97,43.94) | 1.015  | 0.908-1.133  | 0.798            |
|              | H19a2   | 44.14(42.72,46.19) | 44.37(43.23,45.59) | 0.968  | 0.889-1.054  | 0.455            |
|              | H19a3   | 45.48(44.01,47.27) | 45.51(44.65,46.87) | 0.984  | 0.878-1.103  | 0.781            |
|              | H19a4   | 45.05(43.60,46.93) | 45.34(44.20,46.65) | 0.939  | 0.837-1.053  | 0.282            |
|              | H19a5   | 45.12(43.9,47.09)  | 45.19(44.24,46.65) | 0.982  | 0.877-1.100  | 0.757            |
|              | H19a6   | 45.52(44.34,47.29) | 45.72(44.46,46.88) | 0.983  | 0.878-1.100  | 0.762            |
|              | H19a7   | 45.60(44.12,47.33) | 45.82(44.82,46.96) | 0.960  | 0.875-1.052  | 0.381            |
|              | H19a8   | 46.34(44.93,48.10) | 46.81(45.27,47.77) | 0.974  | 0.868-1.093  | 0.656            |
|              | H19a9   | 47.38(46.08,48.85) | 47.52(46.43,48.73) | 0.987  | 0.874-1.114  | 0.829            |
|              | H19a10  | 47.28(46.17,48.86) | 47.41(46.41,48.75) | 0.994  | 0.882-1.121  | 0.926            |
|              | H19a11  | 47.47(46.17,48.93) | 47.76(46.28,48.91) | 0.977  | 0.870-1.097  | 0.695            |
|              | H19a12  | 47.27(45.94,48.93) | 47.50(46.33,49.13) | 0.969  | 0.862-1.089  | 0.594            |
|              | H19a13  | 48.80(47.47,50.48) | 48.84(47.82,50.19) | 0.975  | 0.869-1.094  | 0.669            |
|              | H19a14  | 49.15(47.96,50.75) | 49.36(48.26,50.86) | 0.975  | 0.869-1.094  | 0.663            |

|        |                    |                    |       |             |                             |
|--------|--------------------|--------------------|-------|-------------|-----------------------------|
| H19a15 | 49.12(48.11,50.95) | 49.39(48.13,50.68) | 0.992 | 0.882-1.115 | 0.891                       |
| H19a16 | 49.22(48.01,51.25) | 49.37(47.64,50.55) | 0.998 | 0.887-1.122 | 0.973                       |
| H19b1  | 52.05(45.96,88.84) | 53.09(48.23,88.57) | 0.997 | 0.987-1.008 | 0.624                       |
| H19b2  | 97.40(96.93,97.81) | 97.20(96.83,97.62) | 1.677 | 1.018-2.762 | <b>0.042</b>                |
| H19b3  | 96.20(95.77,96.73) | 96.21(95.80,96.71) | 1.187 | 0.801-1.759 | 0.394                       |
| H19b4  | 89.24(88.11,90.45) | 89.05(87.96,90.26) | 0.980 | 0.915-1.050 | 0.569                       |
| H19b5  | 93.63(92.74,94.20) | 93.46(92.51,94.03) | 1.282 | 0.970-1.695 | 0.081                       |
| H19b6  | 98.01(97.69,98.32) | 97.87(97.48,98.10) | 1.926 | 1.066-3.480 | <b>0.030</b>                |
| H19b7  | 92.57(91.30,93.38) | 91.66(90.50,92.57) | 1.503 | 1.217-1.857 | <b>1.56×10<sup>-4</sup></b> |
| H19b8  | 96.15(95.69,96.64) | 95.91(95.35,96.39) | 1.404 | 1.007-1.958 | <b>0.046</b>                |
| H19b9  | 94.60(93.72,95.60) | 94.17(92.82,94.95) | 1.413 | 1.142-1.747 | <b>0.001</b>                |
| H19b10 | 97.38(96.94,97.80) | 97.30(96.93,97.70) | 1.115 | 0.706-1.761 | 0.641                       |
| H19b11 | 90.62(89.62,91.25) | 90.02(89.22,91.09) | 1.185 | 0.982-1.430 | 0.076                       |
| H19b12 | 96.97(96.54,97.40) | 96.69(96.26,97.10) | 1.824 | 1.155-2.881 | <b>0.010</b>                |
| H19b13 | 96.76(96.28,97.22) | 96.61(96.09,96.98) | 1.626 | 1.057-2.500 | <b>0.027</b>                |
| H19b14 | 95.26(94.73,95.89) | 94.88(94.32,95.41) | 1.379 | 1.048-1.815 | <b>0.022</b>                |
| H19b15 | 97.73(97.24,98.03) | 97.57(97.32,97.89) | 1.201 | 0.712-2.025 | 0.493                       |
| H19c1  | 93.76(92.58,94.67) | 92.70(91.71,93.68) | 1.576 | 1.271-1.955 | <b>3.40×10<sup>-5</sup></b> |
| H19c2  | 86.63(84.91,88.64) | 85.20(83.62,87.49) | 1.149 | 1.032-1.278 | <b>0.011</b>                |
| H19c3  | 95.72(94.61,96.54) | 94.72(93.88,95.81) | 1.364 | 1.105-1.683 | <b>0.004</b>                |
| H19c4  | 95.65(94.81,96.43) | 94.96(94.08,95.70) | 1.325 | 1.061-1.657 | <b>0.013</b>                |

|        |                    |                    |       |             |              |
|--------|--------------------|--------------------|-------|-------------|--------------|
| H19c5  | 96.38(95.60,96.92) | 95.80(95.19,96.25) | 1.651 | 1.206-2.259 | <b>0.002</b> |
| H19c6  | 97.11(96.44,97.67) | 96.71(95.93,97.36) | 1.359 | 1.016-1.819 | <b>0.039</b> |
| H19c7  | 97.94(97.30,98.41) | 97.82(97.35,98.24) | 0.992 | 0.702-1.401 | 0.962        |
| H19c8  | 96.97(96.46,97.65) | 96.48(95.99,96.98) | 1.280 | 0.997-1.644 | 0.053        |
| H19c9  | 93.64(92.57,94.44) | 92.90(91.91,93.72) | 0.994 | 0.939-1.053 | 0.850        |
| H19c10 | 96.77(96.20,97.39) | 96.50(95.95,97.00) | 1.210 | 0.905-1.619 | 0.199        |
| H19c11 | 89.45(87.85,91.30) | 89.26(87.82,90.47) | 1.092 | 0.950-1.255 | 0.214        |
| H19c12 | 97.48(97.02,98.02) | 97.27(96.96,97.87) | 1.240 | 0.921-1.669 | 0.157        |
| H19c13 | 98.00(97.55,98.56) | 97.96(97.56,98.29) | 1.111 | 0.776-1.591 | 0.564        |
| H19c14 | 98.38(97.99,98.77) | 98.37(98.11,98.78) | 0.851 | 0.580-1.249 | 0.410        |
| H19c15 | 98.15(97.78,98.51) | 98.12(97.74,98.53) | 0.985 | 0.641-1.513 | 0.945        |
| H19c16 | 97.63(97.14,97.98) | 97.54(97.14,98.07) | 1.029 | 0.717-1.476 | 0.878        |
| H19c17 | 97.68(97.23,98.06) | 97.63(97.12,97.95) | 1.259 | 0.892-1.779 | 0.190        |
| H19c18 | 94.98(94.09,95.68) | 94.69(93.92,95.46) | 1.057 | 0.940-1.189 | 0.353        |
| H19c19 | 97.20(96.67,97.56) | 97.08(96.44,97.55) | 1.052 | 0.748-1.481 | 0.769        |
| H19d1  | 52.63(46.54,56.56) | 50.00(45.85,55.55) | 1.017 | 0.980-1.056 | 0.368        |
| H19d2  | 51.91(48.03,56.90) | 52.39(48.06,56.67) | 0.996 | 0.953-1.042 | 0.876        |
| H19d3  | 52.24(48.96,56.61) | 52.83(48.71,56.33) | 0.993 | 0.951-1.036 | 0.742        |
| H19d4  | 52.30(49.08,56.46) | 52.11(48.19,56.01) | 1.011 | 0.967-1.058 | 0.631        |
| H19d5  | 53.72(49.26,57.85) | 53.92(49.38,57.43) | 0.990 | 0.948-1.033 | 0.638        |
| H19d6  | 82.04(77.83,85.73) | 80.30(75.54,84.55) | 1.050 | 1.000-1.101 | <b>0.049</b> |
| H19d7  | 73.31(68.57,78.26) | 72.22(67.81,76.21) | 1.025 | 0.984-1.067 | 0.235        |
| H19d8  | 70.36(64.98,75.36) | 68.44(63.65,72.34) | 1.030 | 0.991-1.070 | 0.138        |
| H19d9  | 75.69(70.73,81.04) | 73.81(69.02,78.84) | 1.033 | 0.992-1.076 | 0.116        |
| H19d10 | 61.80(55.97,65.68) | 60.48(56.22,64.44) | 1.017 | 0.976-1.059 | 0.428        |

|           |                    |                    |       |              |              |
|-----------|--------------------|--------------------|-------|--------------|--------------|
| MALAT1a1  | 33.29(31.98,34.55) | 32.87(31.67,34.54) | 1.090 | 0.947-1.255  | 0.229        |
| MALAT1a2  | 25.97(25.00,27.26) | 26.14(25.09,27.59) | 0.941 | 0.811-1.092  | 0.424        |
| MALAT1a3  | 20.25(19.11,21.36) | 19.70(18.76,21.07) | 1.046 | 0.893-1.225  | 0.575        |
| MALAT1a4  | 12.46(11.56,13.63) | 12.65(11.57,13.33) | 1.004 | 0.823-1.224  | 0.971        |
| MALAT1a5  | 5.03(4.57,5.51)    | 5.49(4.91,6.18)    | 0.609 | 0.438-0.847  | <b>0.003</b> |
| MALAT1a6  | 19.83(18.79,21.21) | 19.74(19.01,21.09) | 0.945 | 0.804-1.112  | 0.498        |
| MALAT1a7  | 25.82(24.60,27.13) | 25.61(24.69,27.21) | 0.985 | 0.846-1.148  | 0.848        |
| MALAT1a8  | 21.60(20.49,22.82) | 21.62(20.57,22.81) | 0.975 | 0.833-1.142  | 0.756        |
| MALAT1a9  | 19.81(18.72,20.82) | 19.19(17.77,20.50) | 1.159 | 0.995-1.349  | 0.058        |
| MALAT1a10 | 26.58(25.17,27.81) | 27.09(25.58,28.54) | 0.927 | 0.803-1.071  | 0.302        |
| MALAT1b1  | 0.62(0.45,0.83)    | 0.66(0.54,0.86)    | 0.722 | 0.263-1.983  | 0.527        |
| MALAT1b2  | 0.53(0.40,0.71)    | 0.55(0.44,0.73)    | 0.919 | 0.326-2.586  | 0.872        |
| MALAT1b3  | 0.72(0.54,0.90)    | 0.73(0.58,0.88)    | 0.951 | 0.326-2.773  | 0.926        |
| MALAT1b4  | 0.71(0.49,0.92)    | 0.66(0.48,0.81)    | 2.548 | 0.847-7.664  | 0.096        |
| MALAT1b5  | 0.71(0.54,0.88)    | 0.62(0.46,0.78)    | 3.713 | 1.057-13.048 | <b>0.041</b> |
| MALAT1b6  | 0.71(0.51,0.92)    | 0.76(0.59,0.91)    | 0.850 | 0.330-2.195  | 0.738        |
| MALAT1b7  | 0.75(0.57,0.92)    | 0.79(0.55,0.88)    | 1.466 | 0.578-3.719  | 0.421        |
| MALAT1b8  | 0.8(0.59,1.03)     | 0.83(0.55,1.01)    | 1.006 | 0.382-2.649  | 0.991        |
| MALAT1b9  | 0.75(0.54,0.91)    | 0.65(0.53,0.80)    | 2.914 | 0.859-9.889  | 0.086        |
| MALAT1b10 | 0.72(0.52,0.88)    | 0.70(0.52,0.90)    | 1.364 | 0.502-3.703  | 0.542        |
| MALAT1b11 | 0.52(0.39,0.76)    | 0.51(0.35,0.66)    | 3.005 | 0.882-10.244 | 0.079        |
| MALAT1b12 | 1.39(1.07,1.62)    | 1.32(1.10,1.61)    | 1.300 | 0.629-2.686  | 0.479        |
| MALAT1b13 | 0.53(0.38,0.71)    | 0.55(0.40,0.74)    | 0.717 | 0.237-2.164  | 0.555        |
| MALAT1b14 | 0.70(0.52,0.82)    | 0.71(0.57,0.84)    | 0.771 | 0.228-2.606  | 0.675        |

|           |                    |                    |       |             |       |
|-----------|--------------------|--------------------|-------|-------------|-------|
| MALAT1b15 | 0.7(0.54,0.86)     | 0.77(0.59,0.88)    | 0.746 | 0.241-2.304 | 0.610 |
| MALAT1c1  | 69.68(66.73,71.50) | 69.79(67.61,72.49) | 0.959 | 0.890-1.034 | 0.274 |
| MALAT1c2  | 74.55(71.29,76.69) | 74.75(71.89,77.26) | 0.988 | 0.923-1.058 | 0.735 |
| MALAT1c3  | 67.94(64.08,71.16) | 68.72(64.72,71.88) | 0.978 | 0.933-1.027 | 0.374 |
| MALAT1c4  | 70.07(66.61,72.12) | 70.03(67.23,73.46) | 0.975 | 0.919-1.034 | 0.402 |
| MALAT1c5  | 75.94(72.89,78.38) | 76.31(73.35,78.77) | 0.977 | 0.917-1.040 | 0.459 |
| MALAT1c6  | 80.26(77.61,82.52) | 80.33(77.92,82.81) | 0.985 | 0.917-1.057 | 0.669 |

\*Adjusted for age. a: Methylation level is expressed as a percentage. Data was expressed as median (P<sub>25</sub>, P<sub>75</sub>). GC: gastric cancer, HCs: healthy controls.

**Table S6. Differences of methylation levels of H19, MALAT1 promoters with differentiated GC tumors\***

|                | Name    | Methylation level <sup>a</sup> |                                | Logistic regression analysis |             |         |
|----------------|---------|--------------------------------|--------------------------------|------------------------------|-------------|---------|
|                |         | Poorly differentiated          | Well/Moderately differentiated | Odds Ratio                   | 95%CI       | P-value |
| <b>Genes</b>   | H19     | 76.58(75.81,77.51)             | 76.61(75.65,77.44)             | 0.921                        | 0.704-1.206 | 0.550   |
|                | MALAT1  | 8.89(8.62,9.14)                | 8.85(8.69,9.03)                | 1.120                        | 0.295-4.249 | 0.868   |
| <b>Regions</b> | H19A    | 46.90(45.25,48.39)             | 46.63(45.76,47.93)             | 0.961                        | 0.825-1.120 | 0.613   |
|                | H19B    | 93.80(91.95,94.68)             | 92.75(91.60,94.62)             | 1.114                        | 0.899-1.381 | 0.322   |
|                | H19C    | 95.72(95.21,95.93)             | 95.71(95.45,96.07)             | 0.731                        | 0.387-1.384 | 0.337   |
|                | H19D    | 62.67(59.06,67.12)             | 63.10(58.62,66.90)             | 0.991                        | 0.929-1.057 | 0.791   |
|                | MALAT1A | 21.12(20.38,21.81)             | 20.95(20.51,21.47)             | 1.133                        | 0.668-1.920 | 0.644   |
|                | MALAT1B | 0.74(0.68,0.78)                | 0.75(0.70,0.81)                | 0.057                        | 0.001-3.982 | 0.186   |
|                | MALAT1C | 72.64(70.51,75.51)             | 72.25(68.13,74.21)             | 1.078                        | 0.991-1.173 | 0.081   |
| <b>Sites</b>   | H19a1   | 43.02(40.98,44.44)             | 43.38(41.84,44.98)             | 0.908                        | 0.781-1.057 | 0.214   |
|                | H19a2   | 44.15(42.63,45.62)             | 44.26(43.03,46.12)             | 0.951                        | 0.893-1.013 | 0.121   |
|                | H19a3   | 45.51(43.63,47.30)             | 45.65(44.54,46.94)             | 0.939                        | 0.805-1.097 | 0.428   |
|                | H19a4   | 45.03(43.40,46.99)             | 45.28(43.93,46.53)             | 0.941                        | 0.811-1.093 | 0.428   |
|                | H19a5   | 45.04(43.37,46.99)             | 45.34(44.07,46.98)             | 0.948                        | 0.821-1.094 | 0.462   |
|                | H19a6   | 45.52(43.87,47.30)             | 45.67(44.71,47.18)             | 0.946                        | 0.814-1.098 | 0.465   |
|                | H19a7   | 45.69(44.04,47.28)             | 45.67(44.46,47.19)             | 1.012                        | 0.928-1.104 | 0.783   |
|                | H19a8   | 46.62(44.87,48.02)             | 46.38(45.17,47.89)             | 0.977                        | 0.841-1.135 | 0.764   |
|                | H19a9   | 47.34(45.99,49.03)             | 47.25(46.17,48.61)             | 0.970                        | 0.827-1.137 | 0.705   |
|                | H19a10  | 47.32(45.85,48.98)             | 47.37(46.38,48.60)             | 0.955                        | 0.814-1.121 | 0.574   |
|                | H19a11  | 47.59(46.14,48.85)             | 47.45(46.31,48.72)             | 0.984                        | 0.841-1.151 | 0.840   |
|                | H19a12  | 47.80(46.04,48.90)             | 47.16(45.92,48.50)             | 0.963                        | 0.852-1.088 | 0.541   |
|                | H19a13  | 49.14(47.88,50.56)             | 48.72(47.40,49.97)             | 1.025                        | 0.886-1.187 | 0.740   |
|                | H19a14  | 49.56(47.91,50.99)             | 49.05(48.11,50.61)             | 0.997                        | 0.871-1.141 | 0.963   |
|                | H19a15  | 49.36(48.40,50.94)             | 49.04(48.01,50.50)             | 1.028                        | 0.882-1.198 | 0.725   |

|        |                    |                    |       |             |              |
|--------|--------------------|--------------------|-------|-------------|--------------|
| H19a16 | 48.71(47.67,51.49) | 49.18(48.01,50.59) | 1.038 | 0.892-1.209 | 0.629        |
| H19b1  | 84.93(48.35,89.09) | 52.27(45.96,88.84) | 1.006 | 0.991-1.021 | 0.442        |
| H19b2  | 97.47(97.02,97.96) | 97.41(96.93,97.85) | 1.568 | 0.829-2.964 | 0.166        |
| H19b3  | 96.44(95.85,96.84) | 96.20(95.81,96.81) | 1.174 | 0.691-1.995 | 0.552        |
| H19b4  | 89.70(88.68,90.83) | 88.92(87.90,90.33) | 1.106 | 0.927-1.319 | 0.263        |
| H19b5  | 93.68(92.95,94.16) | 93.68(92.72,94.39) | 1.182 | 0.835-1.674 | 0.347        |
| H19b6  | 97.97(97.73,98.31) | 97.97(97.60,98.32) | 1.279 | 0.600-2.727 | 0.524        |
| H19b7  | 92.14(91.14,93.16) | 92.47(91.30,93.38) | 0.947 | 0.720-1.246 | 0.698        |
| H19b8  | 96.35(95.65,96.63) | 96.16(95.77,96.69) | 0.767 | 0.528-1.116 | 0.166        |
| H19b9  | 94.47(93.17,95.29) | 94.61(93.83,95.67) | 0.892 | 0.679-1.173 | 0.415        |
| H19b10 | 97.38(96.78,97.62) | 97.37(96.97,97.80) | 0.896 | 0.508-1.580 | 0.705        |
| H19b11 | 90.78(89.90,91.57) | 90.64(89.61,91.47) | 1.152 | 0.88-1.507) | 0.303        |
| H19b12 | 97.22(96.63,97.50) | 97.06(96.58,97.46) | 1.200 | 0.686-2.100 | 0.523        |
| H19b13 | 96.85(96.27,97.22) | 96.70(96.18,97.21) | 1.268 | 0.726-2.213 | 0.404        |
| H19b14 | 95.25(94.46,95.93) | 95.37(94.67,95.91) | 0.955 | 0.691-1.320 | 0.781        |
| H19b15 | 97.56(96.95,97.88) | 97.74(97.32,98.03) | 0.602 | 0.308-1.175 | 0.137        |
| H19c1  | 93.51(92.37,94.03) | 93.95(92.97,94.71) | 0.720 | 0.553-0.937 | <b>0.015</b> |
| H19c2  | 86.32(84.04,88.20) | 86.86(85.29,88.81) | 0.896 | 0.778-1.031 | 0.126        |
| H19c3  | 95.69(94.61,96.19) | 95.92(95.05,96.60) | 0.772 | 0.575-1.036 | 0.084        |
| H19c4  | 95.74(94.83,96.19) | 95.58(94.71,96.44) | 0.910 | 0.689-1.201 | 0.504        |
| H19c5  | 96.05(95.21,96.78) | 96.41(95.63,97.00) | 0.702 | 0.481-1.024 | 0.066        |
| H19c6  | 97.14(96.13,97.45) | 96.99(96.43,97.73) | 1.016 | 0.726-1.423 | 0.924        |
| H19c7  | 97.91(97.40,98.20) | 98.05(97.33,98.50) | 0.784 | 0.514-1.195 | 0.258        |
| H19c8  | 97.08(96.52,97.68) | 96.97(96.44,97.68) | 1.154 | 0.842-1.580 | 0.374        |
| H19c9  | 93.36(92.16,94.15) | 93.70(92.71,94.47) | 1.017 | 0.937-1.105 | 0.680        |
| H19c10 | 96.82(96.16,97.31) | 96.80(96.22,97.57) | 0.819 | 0.581-1.154 | 0.254        |
| H19c11 | 89.64(87.73,91.16) | 89.52(87.83,91.23) | 1.033 | 0.870-1.227 | 0.711        |
| H19c12 | 97.52(97.11,97.97) | 97.48(97.06,98.04) | 0.998 | 0.662-1.505 | 0.993        |
| H19c13 | 97.94(97.53,98.48) | 98.01(97.53,98.63) | 0.764 | 0.469-1.243 | 0.278        |
| H19c14 | 98.38(98.06,98.75) | 98.42(98.00,98.80) | 1.214 | 0.708-2.081 | 0.481        |
| H19c15 | 98.05(97.64,98.55) | 98.20(97.77,98.52) | 0.905 | 0.524-1.562 | 0.719        |
| H19c16 | 97.68(97.16,97.91) | 97.62(97.09,98.05) | 1.132 | 0.744-1.721 | 0.564        |
| H19c17 | 97.70(97.31,98.06) | 97.67(97.23,98.10) | 0.937 | 0.595-1.476 | 0.778        |
| H19c18 | 95.15(94.21,95.43) | 94.98(94.07,95.75) | 1.033 | 0.770-1.386 | 0.827        |
| H19c19 | 97.19(96.75,97.66) | 97.19(96.59,97.59) | 1.076 | 0.686-1.686 | 0.751        |
| H19d1  | 54.49(45.97,56.95) | 52.67(47.66,57.49) | 0.966 | 0.919-1.016 | 0.176        |
| H19d2  | 52.50(48.65,58.49) | 52.44(47.96,56.87) | 1.012 | 0.964-1.061 | 0.641        |
| H19d3  | 53.59(50.31,57.53) | 52.92(48.68,56.72) | 1.012 | 0.958-1.068 | 0.678        |
| H19d4  | 51.98(50.10,57.24) | 52.69(48.74,56.16) | 1.007 | 0.956-1.060 | 0.796        |
| H19d5  | 54.55(49.56,58.58) | 53.72(49.58,57.85) | 1.008 | 0.956-1.063 | 0.770        |
| H19d6  | 81.00(77.25,85.71) | 82.82(79.13,87.67) | 0.949 | 0.892-1.009 | 0.094        |
| H19d7  | 74.39(69.14,77.27) | 73.55(69.14,79.70) | 1.012 | 0.966-1.060 | 0.610        |
| H19d8  | 70.34(65.32,77.25) | 70.66(65.50,76.87) | 0.994 | 0.948-1.042 | 0.799        |
| H19d9  | 75.29(71.05,81.73) | 76.85(71.36,82.64) | 0.985 | 0.935-1.039 | 0.583        |

|           |                    |                    |       |             |              |
|-----------|--------------------|--------------------|-------|-------------|--------------|
| H19d10    | 62.29(56.64,65.75) | 62.04(57.05,66.71) | 0.990 | 0.945-1.037 | 0.664        |
| MALAT1a1  | 33.36(32.08,34.50) | 33.00(31.79,34.49) | 0.990 | 0.945-1.037 | 0.664        |
| MALAT1a2  | 26.76(25.01,27.79) | 25.97(24.86,27.34) | 1.104 | 0.910-1.341 | 0.316        |
| MALAT1a3  | 20.23(18.99,20.95) | 20.14(18.89,21.32) | 1.076 | 0.875-1.324 | 0.486        |
| MALAT1a4  | 12.60(11.55,13.62) | 12.33(11.46,13.35) | 1.077 | 0.832-1.394 | 0.576        |
| MALAT1a5  | 5.07(4.60,5.79)    | 4.93(4.40,5.46)    | 1.222 | 0.802-1.862 | 0.351        |
| MALAT1a6  | 19.67(18.20,21.11) | 19.78(18.76,21.12) | 0.921 | 0.747-1.136 | 0.442        |
| MALAT1a7  | 25.91(24.53,27.07) | 25.68(24.72,26.73) | 1.050 | 0.849-1.299 | 0.655        |
| MALAT1a8  | 21.36(20.24,22.46) | 21.63(20.48,22.63) | 0.928 | 0.748-1.152 | 0.499        |
| MALAT1a9  | 20.00(18.65,21.05) | 19.81(18.77,20.78) | 1.052 | 0.849-1.303 | 0.644        |
| MALAT1a10 | 26.40(24.90,27.41) | 26.55(25.21,27.81) | 0.914 | 0.752-1.112 | 0.371        |
| MALAT1b1  | 0.71(0.49,0.92)    | 0.62(0.46,0.84)    | 1.913 | 0.543-6.736 | 0.312        |
| MALAT1b2  | 0.47(0.37,0.76)    | 0.56(0.41,0.71)    | 0.595 | 0.153-2.313 | 0.453        |
| MALAT1b3  | 0.70(0.55,0.84)    | 0.75(0.53,0.91)    | 0.735 | 0.229-2.359 | 0.605        |
| MALAT1b4  | 0.76(0.59,0.94)    | 0.66(0.47,0.91)    | 0.902 | 0.449-1.812 | 0.772        |
| MALAT1b5  | 0.68(0.54,0.87)    | 0.69(0.54,0.88)    | 0.818 | 0.190-3.529 | 0.788        |
| MALAT1b6  | 0.72(0.52,0.92)    | 0.71(0.50,0.91)    | 0.898 | 0.311-2.594 | 0.842        |
| MALAT1b7  | 0.69(0.57,0.84)    | 0.74(0.55,0.93)    | 0.635 | 0.197-2.051 | 0.448        |
| MALAT1b8  | 0.72(0.52,1.04)    | 0.81(0.63,0.98)    | 0.708 | 0.207-2.422 | 0.583        |
| MALAT1b9  | 0.74(0.52,0.82)    | 0.77(0.55,0.93)    | 0.365 | 0.100-1.333 | 0.127        |
| MALAT1b10 | 0.77(0.54,0.96)    | 0.72(0.50,0.93)    | 1.282 | 0.437-3.766 | 0.651        |
| MALAT1b11 | 0.51(0.40,0.80)    | 0.52(0.35,0.75)    | 1.004 | 0.353-2.856 | 0.994        |
| MALAT1b12 | 1.35(1.06,1.61)    | 1.41(1.15,1.65)    | 0.738 | 0.303-1.794 | 0.502        |
| MALAT1b13 | 0.51(0.32,0.70)    | 0.57(0.37,0.74)    | 0.615 | 0.150-2.520 | 0.500        |
| MALAT1b14 | 0.65(0.47,0.77)    | 0.72(0.55,0.85)    | 0.523 | 0.118-2.321 | 0.394        |
| MALAT1b15 | 0.71(0.53,0.86)    | 0.69(0.53,0.86)    | 0.768 | 0.289-2.041 | 0.597        |
| MALAT1c1  | 70.04(67.33,72.39) | 68.99(65.21,71.19) | 1.105 | 1.002-1.219 | <b>0.046</b> |
| MALAT1c2  | 74.55(71.43,77.72) | 73.87(70.55,75.97) | 1.071 | 0.981-1.170 | 0.126        |
| MALAT1c3  | 67.63(64.12,70.96) | 67.25(61.78,70.30) | 1.048 | 0.987-1.113 | 0.129        |
| MALAT1c4  | 70.07(67.70,73.61) | 69.76(66.04,71.62) | 1.066 | 0.988-1.151 | 0.098        |
| MALAT1c5  | 75.45(73.26,78.75) | 75.56(71.37,78.08) | 1.057 | 0.979-1.141 | 0.159        |
| MALAT1c6  | 80.14(77.8,83.05)  | 79.70(76.89,82.33) | 1.075 | 0.981-1.178 | 0.123        |

\*Adjusted for age, gender, smoking and drinking. a: Methylation level is expressed as a percentage. Data was expressed as median (P<sub>25</sub>, P<sub>75</sub>).



**Table S7. Differences of methylation levels of H19, MALAT1 promoters among GC tumors with different TNM staging\***

|                | Name    | Methylation level <sup>a</sup> |                    |                    |                    | Logistic regression analysis (I-III and IV) |               |              |
|----------------|---------|--------------------------------|--------------------|--------------------|--------------------|---------------------------------------------|---------------|--------------|
|                |         | Stage I                        | Stage II           | Stage III          | Stage IV           | Odds Ratio                                  | 95%CI         | P-value      |
| <b>Genes</b>   | H19     | 76.44(75.85,77.27)             | 76.71(76.11,78.59) | 76.95(75.24,77.6)  | 76.55(75.69,77.36) | 0.874                                       | 0.689-1.109   | 0.267        |
|                | MALAT1  | 8.75(8.62,9.19)                | 8.79(8.71,8.88)    | 8.81(8.56,8.99)    | 8.93(8.71,9.12)    | 4.622                                       | 1.339-15.947  | <b>0.015</b> |
| <b>Regions</b> | H19A    | 47.08(46.40,49.28)             | 47.92(46.17,49.41) | 46.53(45.15,47.91) | 46.61(45.8,47.6)   | 0.933                                       | 0.812-1.072   | 0.329        |
|                | H19B    | 91.78(91.61,92.14)             | 93.95(91.50,94.65) | 94.26(91.22,94.64) | 92.71(91.79,94.78) | 1.02                                        | 0.855-1.217   | 0.826        |
|                | H19C    | 95.82(95.06,96.05)             | 95.71(95.31,95.93) | 95.63(95.16,95.93) | 95.81(95.45,96.12) | 1.439                                       | 0.812-2.549   | 0.213        |
|                | H19D    | 62.80(58.74,68.00)             | 65.39(61.14,69.04) | 63.01(59.03,66.25) | 63.01(58.24,67.16) | 0.974                                       | 0.920-1.032   | 0.372        |
|                | MALAT1A | 20.76(20.35,21.89)             | 20.78(20.61,21.12) | 20.85(20.41,21.4)  | 21.18(20.60,21.74) | 1.717                                       | 1.057-2.790   | <b>0.029</b> |
|                | MALAT1B | 0.75(0.72,0.81)                | 0.75(0.69,0.82)    | 0.73(0.68,0.77)    | 0.75(0.69,0.81)    | 8.111                                       | 0.206-319.113 | 0.264        |
|                | MALAT1C | 74.68(70.71,78.60)             | 72.53(67.49,74.85) | 72.00(67.98,73.69) | 72.31(69.09,74.41) | 0.964                                       | 0.895-1.038   | 0.335        |
| <b>Sites</b>   | H19a1   | 43.22(41.08,44.59)             | 44.52(41.82,45.53) | 42.98(40.77,44.16) | 43.18(41.85,44.92) | 0.998                                       | 0.879-1.133   | 0.974        |
|                | H19a2   | 44.95(43.28,46.42)             | 45.80(43.29,47.83) | 43.93(42.61,45.60) | 44.20(43.08,45.79) | 0.996                                       | 0.937-1.058   | 0.896        |
|                | H19a3   | 45.94(44.60,47.93)             | 47.13(44.79,48.55) | 45.09(43.79,46.99) | 45.65(44.54,46.87) | 0.956                                       | 0.840-1.090   | 0.504        |
|                | H19a4   | 45.05(43.87,47.53)             | 46.15(42.24,48.20) | 45.01(43.51,46.54) | 45.20(43.97,46.39) | 0.934                                       | 0.818-1.066   | 0.31         |
|                | H19a5   | 45.73(44.25,47.39)             | 46.43(44.64,48.03) | 44.85(43.62,46.69) | 45.30(44.06,46.97) | 0.967                                       | 0.851-1.099   | 0.609        |
|                | H19a6   | 46.49(44.69,48.14)             | 46.99(44.80,48.74) | 45.37(44.14,46.96) | 45.64(44.58,47.16) | 0.951                                       | 0.834-1.085   | 0.453        |
|                | H19a7   | 46.32(45.23,48.18)             | 46.90(44.50,48.34) | 45.24(44.24,47.32) | 45.65(44.45,46.98) | 0.929                                       | 0.821-1.052   | 0.244        |
|                | H19a8   | 46.67(45.83,49.17)             | 47.77(46.14,49.04) | 46.14(44.94,47.80) | 46.38(45.04,47.61) | 0.912                                       | 0.797-1.043   | 0.177        |
|                | H19a9   | 47.61(46.78,50.02)             | 48.80(46.52,50.15) | 47.13(45.88,48.50) | 47.11(46.12,48.59) | 0.93                                        | 0.807-1.073   | 0.322        |
|                | H19a10  | 47.89(46.87,50.31)             | 48.71(46.98,50.02) | 47.09(46.02,48.55) | 47.28(46.20,48.44) | 0.924                                       | 0.801-1.067   | 0.281        |
|                | H19a11  | 48.19(46.87,50.12)             | 48.55(45.39,50.41) | 47.42(46.17,48.79) | 47.44(46.37,48.49) | 0.931                                       | 0.809-1.072   | 0.323        |

|        |                    |                    |                    |                    |       |             |              |
|--------|--------------------|--------------------|--------------------|--------------------|-------|-------------|--------------|
| H19a12 | 47.82(46.87,49.89) | 48.36(45.25,49.61) | 47.32(45.67,48.82) | 47.15(45.97,48.36) | 0.989 | 0.879-1.114 | 0.858        |
| H19a13 | 49.83(48.78,52.1)  | 50.32(47.89,51.90) | 49.03(47.21,50.08) | 48.63(47.38,49.87) | 0.906 | 0.791-1.038 | 0.153        |
| H19a14 | 50.35(48.93,52.24) | 51.00(48.71,52.37) | 49.57(47.86,50.32) | 48.96(48.00,50.17) | 0.939 | 0.825-1.069 | 0.34         |
| H19a15 | 50.43(48.80,52.18) | 50.85(48.87,52.12) | 49.33(47.58,50.57) | 48.82(48.10,50.30) | 0.885 | 0.766-1.022 | 0.097        |
| H19a16 | 51.02(49.00,52.61) | 50.21(48.49,52.23) | 48.77(47.37,51.17) | 48.83(48.00,50.59) | 0.914 | 0.794-1.053 | 0.213        |
| H19b1  | 49.31(43.73,50.38) | 88.06(43.44,89.66) | 86.70(44.92,89.88) | 52.33(47.49,88.74) | 0.999 | 0.987-1.011 | 0.876        |
| H19b2  | 97.50(97.14,97.60) | 96.98(96.66,97.35) | 97.45(97.08,97.97) | 97.45(97.01,97.86) | 1.186 | 0.685-2.052 | 0.543        |
| H19b3  | 96.19(95.86,96.97) | 95.87(95.49,96.16) | 96.36(95.97,96.62) | 96.41(95.83,96.92) | 1.507 | 0.924-2.458 | 0.101        |
| H19b4  | 89.80(87.47,91.55) | 88.75(87.16,89.35) | 89.29(87.30,90.60) | 89.21(88.37,90.58) | 0.984 | 0.917-1.056 | 0.655        |
| H19b5  | 94.19(93.26,94.76) | 93.17(92.44,93.78) | 93.96(93.12,94.48) | 93.67(92.72,94.29) | 1.01  | 0.740-1.380 | 0.948        |
| H19b6  | 98.01(97.83,98.20) | 97.91(97.70,98.21) | 97.87(97.63,98.27) | 98.00(97.58,98.35) | 1.384 | 0.713-2.686 | 0.337        |
| H19b7  | 91.25(90.24,92.71) | 92.51(90.65,93.76) | 92.12(90.87,93.13) | 92.63(91.66,93.34) | 1.172 | 0.916-1.500 | 0.207        |
| H19b8  | 96.07(94.87,96.59) | 95.97(95.33,96.80) | 96.22(95.68,96.64) | 96.27(95.91,96.67) | 1.04  | 0.733-1.475 | 0.828        |
| H19b9  | 94.00(93.13,96.09) | 94.40(93.15,95.57) | 94.51(93.12,95.04) | 94.74(94.12,95.68) | 1.345 | 1.041-1.737 | <b>0.023</b> |
| H19b10 | 97.40(97.03,97.84) | 97.57(96.96,97.93) | 97.62(96.66,97.96) | 97.34(96.95,97.71) | 0.67  | 0.394-1.139 | 0.139        |
| H19b11 | 90.08(88.77,91.30) | 89.51(88.90,91.08) | 90.58(89.90,91.11) | 90.79(89.96,91.76) | 1.248 | 0.988-1.575 | 0.063        |
| H19b12 | 96.51(96.01,97.17) | 96.86(96.47,97.38) | 97.13(96.36,97.47) | 97.21(96.76,97.52) | 1.582 | 0.964-2.595 | 0.07         |
| H19b13 | 96.73(95.81,97.11) | 96.68(96.49,97.11) | 96.80(96.19,97.42) | 96.74(96.24,97.18) | 0.843 | 0.523-1.357 | 0.482        |
| H19b14 | 95.6(94.02,96.47)  | 95.09(93.85,95.73) | 95.11(94.53,95.59) | 95.47(94.76,96.16) | 1.313 | 0.973-1.773 | 0.075        |
| H19b15 | 97.51(96.88,98.12) | 97.45(96.96,97.88) | 97.50(97.15,98.01) | 97.76(97.39,98.04) | 1.469 | 0.809-2.668 | 0.206        |
| H19c1  | 93.63(92.76,94.3)  | 93.71(92.33,94.23) | 93.72(92.73,94.78) | 93.76(92.85,94.68) | 1.154 | 0.925-1.439 | 0.205        |
| H19c2  | 84.97(82.85,87.79) | 86.80(85.35,87.69) | 86.19(84.26,88.08) | 86.89(85.07,88.96) | 1.098 | 0.969-1.244 | 0.143        |
| H19c3  | 95.71(94.39,96.13) | 95.75(95.05,96.39) | 95.31(94.61,96.17) | 96.01(95.11,96.77) | 1.32  | 1.014-1.718 | <b>0.039</b> |
| H19c4  | 95.63(95.08,96.43) | 94.51(94.12,95.47) | 95.41(94.86,96.21) | 95.80(94.96,96.57) | 1.295 | 0.996-1.684 | 0.054        |
| H19c5  | 95.96(95.43,97.08) | 96.47(95.61,96.96) | 96.37(95.69,96.89) | 96.34(95.46,96.95) | 1.008 | 0.737-1.379 | 0.961        |
| H19c6  | 97.40(95.96,98.28) | 96.81(95.82,97.40) | 97.27(96.14,97.82) | 97.04(96.49,97.64) | 1.028 | 0.769-1.373 | 0.853        |

|          |                    |                    |                    |                    |       |             |       |
|----------|--------------------|--------------------|--------------------|--------------------|-------|-------------|-------|
| H19c7    | 98.21(97.17,98.63) | 98.01(97.18,98.36) | 97.86(96.83,98.55) | 97.92(97.46,98.40) | 1.269 | 0.874-1.842 | 0.211 |
| H19c8    | 96.06(95.09,97.44) | 96.92(96.51,98.17) | 97.30(96.69,97.79) | 96.95(96.49,97.58) | 0.855 | 0.649-1.126 | 0.265 |
| H19c9    | 93.77(92.57,94.65) | 94.13(93.20,94.86) | 92.71(91.62,93.95) | 93.70(92.79,94.47) | 0.975 | 0.904-1.051 | 0.51  |
| H19c10   | 96.49(96.07,97.62) | 96.79(96.36,97.81) | 96.73(95.79,97.26) | 96.89(96.40,97.56) | 1.164 | 0.856-1.582 | 0.334 |
| H19c11   | 89.99(89.09,91.88) | 89.71(87.63,91.34) | 89.29(87.48,91.10) | 89.63(87.88,91.24) | 1.004 | 0.867-1.163 | 0.957 |
| H19c12   | 97.78(97.18,98.26) | 97.63(96.82,98.34) | 97.43(96.79,97.97) | 97.51(97.19,97.96) | 1.296 | 0.892-1.883 | 0.174 |
| H19c13   | 97.78(96.89,98.22) | 97.66(97.22,98.32) | 98.01(97.52,98.49) | 98.04(97.62,98.63) | 1.507 | 0.973-2.334 | 0.066 |
| H19c14   | 98.31(97.76,98.72) | 98.27(97.94,98.70) | 98.31(97.89,98.62) | 98.48(98.07,98.85) | 1.09  | 0.742-1.601 | 0.661 |
| H19c15   | 97.71(97.55,98.25) | 97.89(97.77,98.48) | 98.12(97.62,98.47) | 98.19(97.82,98.53) | 1.175 | 0.715-1.929 | 0.524 |
| H19c16   | 97.38(96.68,97.91) | 97.79(97.06,98.28) | 97.75(97.19,97.95) | 97.60(97.13,98.06) | 1.013 | 0.699-1.469 | 0.946 |
| H19c17   | 97.55(96.37,97.92) | 97.87(97.35,98.55) | 97.55(97.10,97.92) | 97.70(97.29,98.10) | 1.051 | 0.708-1.562 | 0.805 |
| H19c18   | 94.70(93.92,95.64) | 94.85(93.70,95.25) | 94.74(94.07,95.72) | 95.13(94.10,95.75) | 1.106 | 0.854-1.432 | 0.447 |
| H19c19   | 97.51(96.90,97.93) | 97.03(95.99,97.13) | 97.01(96.60,97.73) | 97.27(96.72,97.56) | 1.233 | 0.825-1.842 | 0.306 |
| H19d1    | 50.55(45.66,56.79) | 52.33(48.26,59.16) | 54.12(47.39,56.68) | 52.67(46.86,57.56) | 0.998 | 0.958-1.041 | 0.943 |
| H19d2    | 52.50(47.51,57.38) | 53.32(51.45,58.44) | 51.85(47.76,55.31) | 52.50(48.16,57.63) | 0.987 | 0.945-1.031 | 0.554 |
| H19d3    | 55.05(50.29,57.07) | 53.84(49.50,57.53) | 51.72(49.79,56.32) | 53.00(48.77,57.35) | 0.981 | 0.935-1.029 | 0.438 |
| H19d4    | 52.88(50.62,56.01) | 53.89(52.09,57.07) | 52.11(47.82,54.90) | 52.28(48.84,57.04) | 0.993 | 0.948-1.039 | 0.751 |
| H19d5    | 53.45(48.95,58.20) | 55.41(52.07,57.78) | 53.45(50.23,55.84) | 53.94(49.17,58.49) | 1.002 | 0.957-1.049 | 0.932 |
| H19d6    | 79.09(75.93,89.46) | 83.48(78.91,88.57) | 82.48(79.04,87.03) | 82.71(78.09,86.61) | 0.972 | 0.920-1.028 | 0.319 |
| H19d7    | 73.08(69.17,81.51) | 74.96(66.31,82.36) | 74.07(70.22,80.82) | 72.62(69.12,78.54) | 0.958 | 0.915-1.002 | 0.06  |
| H19d8    | 70.89(64.80,80.7)  | 70.98(63.45,81.85) | 70.66(64.77,76.32) | 70.31(65.62,75.80) | 0.973 | 0.932-1.015 | 0.2   |
| H19d9    | 75.29(70.66,81.77) | 78.19(70.40,86.53) | 77.78(70.28,85.11) | 76.19(71.68,80.94) | 0.968 | 0.925-1.013 | 0.166 |
| H19d10   | 60.40(55.85,68.84) | 64.26(55.59,71.07) | 61.88(55.77,65.06) | 62.26(56.87,66.94) | 1.005 | 0.964-1.047 | 0.813 |
| MALAT1a1 | 32.99(32.39,35.51) | 33.38(31.95,35.00) | 32.96(31.52,34.36) | 33.17(31.81,34.49) | 1.019 | 0.859-1.208 | 0.832 |
| MALAT1a2 | 26.23(23.78,27.38) | 25.50(24.99,27.46) | 25.96(24.95,27.11) | 26.15(24.83,28.07) | 1.079 | 0.908-1.283 | 0.388 |
| MALAT1a3 | 20.77(19.18,22.83) | 19.64(17.83,20.48) | 20.00(18.19,20.98) | 20.28(19.22,21.34) | 1.165 | 0.968-1.404 | 0.106 |

|           |                    |                    |                    |                    |       |              |              |
|-----------|--------------------|--------------------|--------------------|--------------------|-------|--------------|--------------|
| MALAT1a4  | 11.01(10.02,12.30) | 11.70(11.18,13.18) | 12.25(11.60,13.08) | 12.47(11.62,13.79) | 1.347 | 1.057-1.716  | <b>0.016</b> |
| MALAT1a5  | 4.90(4.64,5.56)    | 5.16(4.47,5.88)    | 4.94(4.39,5.21)    | 5.00(4.43,5.64)    | 1.012 | 0.696-1.473  | 0.948        |
| MALAT1a6  | 18.93(17.84,22.85) | 18.59(17.57,20.31) | 20.08(18.50,21.26) | 19.81(19.05,21.06) | 1.106 | 0.914-1.340  | 0.3          |
| MALAT1a7  | 25.36(24.24,27.99) | 24.9(24.34,27.06)  | 25.34(23.93,26.47) | 25.94(24.80,27.14) | 1.147 | 0.945-1.391  | 0.165        |
| MALAT1a8  | 21.84(20.12,22.88) | 21.98(20.2,22.94)  | 21.36(20.06,22.86) | 21.57(20.53,22.43) | 0.977 | 0.810-1.179  | 0.81         |
| MALAT1a9  | 20.14(19.07,20.98) | 19.01(17.64,20.44) | 20.05(18.75,20.90) | 19.82(18.69,20.95) | 0.989 | 0.818-1.196  | 0.91         |
| MALAT1a10 | 26.28(23.57,26.85) | 26.62(25.71,28.02) | 25.95(24.62,27.33) | 26.67(25.19,27.99) | 1.158 | 0.977-1.372  | 0.091        |
| MALAT1b1  | 0.53(0.31,0.68)    | 0.70(0.63,0.85)    | 0.53(0.44,0.91)    | 0.64(0.48,0.87)    | 1.052 | 0.338-3.281  | 0.93         |
| MALAT1b2  | 0.64(0.45,0.80)    | 0.45(0.33,0.60)    | 0.49(0.37,0.75)    | 0.56(0.41,0.73)    | 2.144 | 0.611-7.527  | 0.234        |
| MALAT1b3  | 0.69(0.45,1.27)    | 0.76(0.62,1.05)    | 0.64(0.46,0.88)    | 0.73(0.57,0.89)    | 0.774 | 0.284-2.104  | 0.615        |
| MALAT1b4  | 0.63(0.4,0.87)     | 0.68(0.38,0.98)    | 0.81(0.48,0.97)    | 0.66(0.49,0.91)    | 1.046 | 0.559-1.957  | 0.888        |
| MALAT1b5  | 0.95(0.77,1.10)    | 0.70(0.56,0.92)    | 0.67(0.50,0.79)    | 0.69(0.53,0.88)    | 1.271 | 0.364-4.441  | 0.707        |
| MALAT1b6  | 0.90(0.40,1.04)    | 0.64(0.39,0.91)    | 0.69(0.54,0.92)    | 0.71(0.52,0.89)    | 1.06  | 0.418-2.688  | 0.902        |
| MALAT1b7  | 0.77(0.72,0.82)    | 0.81(0.56,1.02)    | 0.73(0.60,0.92)    | 0.70(0.54,0.91)    | 1.023 | 0.403-2.597  | 0.962        |
| MALAT1b8  | 1.01(0.72,1.20)    | 0.90(0.66,1.49)    | 0.81(0.60,1.08)    | 0.75(0.58,0.95)    | 0.331 | 0.107-1.025  | 0.055        |
| MALAT1b9  | 0.87(0.66,1.12)    | 0.71(0.45,0.90)    | 0.72(0.56,0.85)    | 0.77(0.52,0.94)    | 1.728 | 0.605-4.935  | 0.307        |
| MALAT1b10 | 0.79(0.67,0.86)    | 0.67(0.60,0.98)    | 0.75(0.48,0.97)    | 0.73(0.51,0.95)    | 1.096 | 0.424-2.834  | 0.85         |
| MALAT1b11 | 0.52(0.37,0.78)    | 0.60(0.41,0.92)    | 0.52(0.35,0.77)    | 0.49(0.35,0.75)    | 0.966 | 0.375-2.490  | 0.943        |
| MALAT1b12 | 1.44(1.12,1.66)    | 1.30(1.10,1.50)    | 1.40(1.04,1.69)    | 1.41(1.13,1.65)    | 1.671 | 0.746-3.743  | 0.212        |
| MALAT1b13 | 0.71(0.39,0.86)    | 0.57(0.42,0.77)    | 0.46(0.29,0.70)    | 0.55(0.37,0.71)    | 0.699 | 0.217-2.249  | 0.548        |
| MALAT1b14 | 0.72(0.47,0.84)    | 0.62(0.47,0.76)    | 0.71(0.49,0.82)    | 0.70(0.52,0.85)    | 2.509 | 0.643-9.786  | 0.185        |
| MALAT1b15 | 0.64(0.38,0.75)    | 0.75(0.55,1.10)    | 0.62(0.46,0.77)    | 0.73(0.56,0.86)    | 3.175 | 0.887-11.368 | 0.076        |
| MALAT1c1  | 70.33(67.31,72.97) | 69.94(65.93,72.81) | 69.85(65.80,71.63) | 69.06(65.56,71.16) | 0.941 | 0.864-1.025  | 0.165        |

|          |                    |                    |                    |                    |       |             |       |
|----------|--------------------|--------------------|--------------------|--------------------|-------|-------------|-------|
| MALAT1c2 | 77.01(73.29,80.66) | 74.01(70.47,77.21) | 73.61(70.62,75.93) | 73.94(71.11,76.16) | 0.962 | 0.890-1.040 | 0.334 |
| MALAT1c3 | 69.34(63.71,76.13) | 66.30(61.89,70.99) | 67.41(62.34,69.71) | 67.12(62.37,70.73) | 0.979 | 0.928-1.033 | 0.437 |
| MALAT1c4 | 72.03(69.06,78.13) | 70.52(63.16,73.62) | 68.81(66.10,71.50) | 69.57(66.46,72.08) | 0.973 | 0.910-1.039 | 0.409 |
| MALAT1c5 | 77.61(74.63,81.65) | 75.27(71.30,79.28) | 74.76(71.68,76.62) | 75.25(71.67,78.38) | 0.97  | 0.905-1.039 | 0.386 |
| MALAT1c6 | 82.41(77.14,87.08) | 79.23(76.92,82.25) | 79.55(77.50,82.31) | 79.77(77.01,82.35) | 0.962 | 0.887-1.043 | 0.348 |

\*Adjusted for age, gender, smoking and drinking. a: Methylation level is expressed as a percentage. Data was expressed as median (P<sub>25</sub>, P<sub>75</sub>).

**Table S8. Differences of methylation levels of H19, MALAT1 promoters in tumors from GC patients with and without metastasis\***

|                | Name               | Methylation level <sup>a</sup> |                    |                    | Logistic regression analysis | Odds Ratio  | 95%CI        | P-value      |
|----------------|--------------------|--------------------------------|--------------------|--------------------|------------------------------|-------------|--------------|--------------|
|                |                    | NA                             | L or V             | L and V            |                              |             |              |              |
| <b>Genes</b>   | H19                | 76.72(75.75,77.6)              | 76.72(75.75,77.6)  | 76.55(75.73,77.17) | #1 and 2                     | 0.855       | 0.660-1.108  | 0.237        |
|                |                    |                                |                    |                    | #1 and 3                     | 0.929       | 0.672-1.284  | 0.655        |
|                | MALAT1             | 8.79(8.62,8.98)                | 8.79(8.62,8.98)    | 8.97(8.69,9.10)    | #1 and 2                     | 5.330       | 1.373-20.687 | <b>0.016</b> |
|                |                    |                                |                    |                    | #1 and 3                     | 3.341       | 0.661-16.897 | 0.145        |
| <b>Regions</b> | H19A               | 46.89(45.54,48.55)             | 46.89(45.54,48.55) | 46.25(45.51,48.21) | #1 and 2                     | 0.915       | 0.785-1.066  | 0.252        |
|                |                    |                                |                    |                    | #1 and 3                     | 0.969       | 0.806-1.164  | 0.733        |
|                | H19B               | 93.72(91.45,94.62)             | 93.72(91.45,94.62) | 92.50(91.96,94.75) | #1 and 2                     | 1.008       | 0.833-1.220  | 0.933        |
|                |                    |                                |                    |                    | #1 and 3                     | 1.051       | 0.817-1.352  | 0.697        |
|                | H19C               | 95.65(95.20,95.92)             | 95.65(95.20,95.92) | 95.91(95.53,96.40) | #1 and 2                     | 1.231       | 0.661-2.291  | 0.512        |
|                |                    |                                |                    |                    | #1 and 3                     | 2.029       | 0.883-4.660  | 0.095        |
|                | H19D               | 63.45(59.33,66.49)             | 63.45(59.33,66.49) | 61.47(57.81,65.94) | #1 and 2                     | 0.972       | 0.913-1.035  | 0.379        |
| #1 and 3       |                    |                                |                    |                    | 0.981                        | 0.909-1.058 | 0.613        |              |
| MALAT1A        | 20.81(20.47,21.31) | 20.81(20.47,21.31)             | 21.28(20.55,21.66) | #1 and 2           | 1.781                        | 1.048-3.026 | 0.033        |              |

|              |                    |                    |                    |                    |          |               |             |       |
|--------------|--------------------|--------------------|--------------------|--------------------|----------|---------------|-------------|-------|
|              |                    |                    |                    | #1 and 3           | 1.571    | 0.827-2.984   | 0.168       |       |
|              |                    |                    |                    | #1 and 2           | 12.265   | 0.247-609.827 | 0.208       |       |
|              |                    |                    |                    | #1 and 3           | 2.274    | 0.014-366.329 | 0.751       |       |
|              |                    |                    |                    | #1 and 2           | 0.949    | 0.876-1.028   | 0.202       |       |
|              |                    |                    |                    | #1 and 3           | 1.013    | 0.908-1.131   | 0.810       |       |
| <b>Sites</b> | MALAT1B            | 0.74(0.70,0.78)    | 0.74(0.70,0.78)    | 0.76(0.68,0.84)    | #1 and 2 | 0.981         | 0.853-1.128 | 0.789 |
|              |                    |                    |                    |                    | #1 and 3 | 1.024         | 0.867-1.209 | 0.778 |
|              | MALAT1C            | 72.60(68.16,74.68) | 72.6(68.16,74.68)  | 72.98(68.80,75.43) | #1 and 2 | 1.005         | 0.931-1.085 | 0.891 |
|              |                    |                    |                    |                    | #1 and 3 | 0.991         | 0.925-1.061 | 0.786 |
|              | H19a1              | 43.11(41.45,44.95) | 43.11(41.45,44.95) | 43.11(41.60,45.22) | #1 and 2 | 0.931         | 0.803-1.079 | 0.340 |
|              |                    |                    |                    |                    | #1 and 3 | 0.998         | 0.843-1.182 | 0.980 |
|              | H19a2              | 44.63(42.70,46.50) | 44.63(42.70,46.50) | 43.97(43.00,46.23) | #1 and 2 | 0.936         | 0.811-1.081 | 0.371 |
|              |                    |                    |                    |                    | #1 and 3 | 0.926         | 0.774-1.108 | 0.402 |
|              | H19a3              | 45.49(44.15,47.59) | 45.49(44.15,47.59) | 45.49(44.29,47.34) | #1 and 2 | 0.956         | 0.831-1.100 | 0.528 |
|              |                    |                    |                    |                    | #1 and 3 | 0.988         | 0.832-1.173 | 0.889 |
|              | H19a4              | 45.48(43.51,47.11) | 45.48(43.51,47.11) | 44.92(43.88,46.55) | #1 and 2 | 0.930         | 0.803-1.076 | 0.330 |
|              |                    |                    |                    |                    | #1 and 3 | 0.985         | 0.829-1.169 | 0.860 |
| H19a5        | 45.29(43.90,47.22) | 45.29(43.90,47.22) | 45.33(43.83,47.27) | #1 and 2           | 0.936    | 0.823-1.065   | 0.316       |       |
|              |                    |                    |                    | #1 and 3           | 0.912    | 0.796-1.045   | 0.186       |       |
| H19a6        | 45.71(44.38,47.49) | 45.71(44.38,47.49) | 45.41(44.48,47.60) | #1 and 2           | 0.887    | 0.763-1.033   | 0.123       |       |
|              |                    |                    |                    | #1 and 3           | 0.952    | 0.799-1.135   | 0.583       |       |
| H19a7        | 45.83(44.37,47.63) | 45.83(44.37,47.63) | 45.42(44.39,47.76) | #1 and 2           | 0.900    | 0.768-1.055   | 0.193       |       |
|              |                    |                    |                    | #1 and 3           | 0.983    | 0.816-1.184   | 0.855       |       |
| H19a8        | 46.71(45.15,48.26) | 46.71(45.15,48.26) | 46.39(45.15,48.22) | #1 and 2           | 0.892    | 0.760-1.048   | 0.164       |       |
|              |                    |                    |                    | #1 and 3           | 0.983    | 0.815-1.185   | 0.856       |       |
| H19a9        | 47.46(45.92,49.45) | 47.46(45.92,49.45) | 47.62(46.00,49.17) | #1 and 2           | 0.888    | 0.758-1.040   | 0.141       |       |
|              |                    |                    |                    |                    |          |               |             |       |
| H19a10       | 47.68(46.31,49.15) | 47.68(46.31,49.15) | 47.40(46.48,48.92) |                    |          |               |             |       |
|              |                    |                    |                    |                    |          |               |             |       |
| H19a11       | 47.79(46.23,49.26) | 47.79(46.23,49.26) | 47.84(46.59,48.95) |                    |          |               |             |       |

|        |                    |                    |                    |          |       |             |              |
|--------|--------------------|--------------------|--------------------|----------|-------|-------------|--------------|
|        |                    |                    |                    | #1 and 3 | 1.010 | 0.838-1.219 | 0.914        |
|        |                    |                    |                    | #1 and 2 | 0.979 | 0.858-1.116 | 0.746        |
| H19a12 | 47.77(45.70,49.15) | 47.77(45.70,49.15) | 47.17(46.03,48.88) | #1 and 3 | 1.020 | 0.858-1.213 | 0.819        |
|        |                    |                    |                    | #1 and 2 | 0.863 | 0.740-1.008 | 0.062        |
| H19a13 | 49.32(47.47,50.75) | 49.32(47.47,50.75) | 48.71(47.49,50.49) | #1 and 3 | 0.985 | 0.825-1.176 | 0.866        |
|        |                    |                    |                    | #1 and 2 | 0.919 | 0.797-1.059 | 0.243        |
| H19a14 | 49.70(48.06,51.27) | 49.70(48.06,51.27) | 49.85(48.25,50.97) | #1 and 3 | 0.983 | 0.826-1.171 | 0.851        |
|        |                    |                    |                    | #1 and 2 | 0.841 | 0.715-0.989 | <b>0.036</b> |
| H19a15 | 49.70(47.92,51.26) | 49.70(47.92,51.26) | 49.31(48.06,51.17) | #1 and 3 | 0.972 | 0.804-1.174 | 0.766        |
|        |                    |                    |                    | #1 and 2 | 0.871 | 0.746-1.017 | 0.082        |
| H19a16 | 49.80(47.95,51.41) | 49.80(47.95,51.41) | 49.76(48.64,51.42) | #1 and 3 | 1.023 | 0.842-1.242 | 0.820        |
|        |                    |                    |                    | #1 and 2 | 1.000 | 0.987-1.014 | 0.997        |
| H19b1  | 86.62(43.89,89.63) | 86.62(43.89,89.63) | 51.74(47.99,86.13) | #1 and 3 | 0.997 | 0.980-1.014 | 0.716        |
|        |                    |                    |                    | #1 and 2 | 0.991 | 0.545-1.804 | 0.977        |
| H19b2  | 97.35(96.94,97.66) | 97.35(96.94,97.66) | 97.66(97.07,97.90) | #1 and 3 | 1.694 | 0.793-3.619 | 0.174        |
|        |                    |                    |                    | #1 and 2 | 1.441 | 0.851-2.440 | 0.174        |
| H19b3  | 96.18(95.78,96.59) | 96.18(95.78,96.59) | 96.33(95.8,97.08)  | #1 and 3 | 1.626 | 0.840-3.150 | 0.149        |
|        |                    |                    |                    | #1 and 2 | 0.965 | 0.894-1.041 | 0.358        |
| H19b4  | 88.93(87.32,90.47) | 88.93(87.32,90.47) | 89.5(88.41,90.52)  | #1 and 3 | 1.097 | 0.891-1.352 | 0.383        |
|        |                    |                    |                    | #1 and 2 | 1.013 | 0.725-1.415 | 0.942        |
| H19b5  | 93.70(92.86,94.34) | 93.70(92.86,94.34) | 93.70(92.9,94.21)  | #1 and 3 | 0.997 | 0.636-1.561 | 0.988        |
|        |                    |                    |                    | #1 and 2 | 1.263 | 0.618-2.580 | 0.522        |
| H19b6  | 97.92(97.66,98.20) | 97.92(97.66,98.20) | 98.15(97.50,98.40) | #1 and 3 | 1.680 | 0.657-4.294 | 0.279        |
|        |                    |                    |                    | #1 and 2 | 1.089 | 0.831-1.427 | 0.536        |
| H19b7  | 92.12(90.77,93.13) | 92.12(90.77,93.13) | 93.23(92.14,93.62) | #1 and 3 | 1.360 | 0.966-1.917 | 0.078        |
|        |                    |                    |                    | #1 and 2 | 0.983 | 0.679-1.424 | 0.929        |
| H19b8  | 96.18(95.54,96.64) | 96.18(95.54,96.64) | 96.21(96.00,96.66) |          |       |             |              |

|        |                    |                    |                    |          |       |             |              |
|--------|--------------------|--------------------|--------------------|----------|-------|-------------|--------------|
|        |                    |                    |                    | #1 and 3 | 1.394 | 0.736-2.639 | 0.308        |
| H19b9  | 94.44(93.22,95.30) | 94.44(93.22,95.30) | 94.89(94.41,95.96) | #1 and 2 | 1.363 | 1.037-1.791 | <b>0.026</b> |
|        |                    |                    |                    | #1 and 3 | 1.312 | 0.927-1.857 | 0.125        |
| H19b10 | 97.6(96.95,97.92)  | 97.6(96.95,97.92)  | 97.41(96.72,97.78) | #1 and 2 | 0.583 | 0.327-1.039 | 0.067        |
|        |                    |                    |                    | #1 and 3 | 0.903 | 0.444-1.837 | 0.777        |
| H19b11 | 90.49(89.33,91.11) | 90.49(89.33,91.11) | 90.95(90.39,91.97) | #1 and 2 | 1.174 | 0.923-1.493 | 0.191        |
|        |                    |                    |                    | #1 and 3 | 1.554 | 1.067-2.263 | <b>0.021</b> |
| H19b12 | 96.96(96.35,97.41) | 96.96(96.35,97.41) | 97.30(96.87,97.64) | #1 and 2 | 1.546 | 0.899-2.657 | 0.115        |
|        |                    |                    |                    | #1 and 3 | 1.701 | 0.869-3.332 | 0.121        |
| H19b13 | 96.69(96.26,97.35) | 96.69(96.26,97.35) | 96.74(96.25,97.27) | #1 and 2 | 0.791 | 0.470-1.333 | 0.379        |
|        |                    |                    |                    | #1 and 3 | 0.950 | 0.495-1.826 | 0.878        |
| H19b14 | 95.18(94.45,95.72) | 95.18(94.45,95.72) | 95.69(95.28,96.35) | #1 and 2 | 1.150 | 0.837-1.580 | 0.387        |
|        |                    |                    |                    | #1 and 3 | 2.131 | 1.243-3.655 | <b>0.006</b> |
| H19b15 | 97.50(97.01,97.98) | 97.50(97.01,97.98) | 97.80(97.44,98.07) | #1 and 2 | 1.428 | 0.747-2.733 | 0.281        |
|        |                    |                    |                    | #1 and 3 | 1.601 | 0.702-3.654 | 0.263        |
| H19c1  | 93.72(92.73,94.67) | 93.72(92.73,94.67) | 93.97(92.51,94.75) | #1 and 2 | 1.138 | 0.898-1.442 | 0.286        |
|        |                    |                    |                    | #1 and 3 | 1.177 | 0.861-1.610 | 0.306        |
| H19c2  | 86.19(84.42,87.87) | 86.19(84.42,87.87) | 87.38(85.76,89.91) | #1 and 2 | 1.045 | 0.914-1.194 | 0.519        |
|        |                    |                    |                    | #1 and 3 | 1.249 | 1.037-1.504 | <b>0.019</b> |
| H19c3  | 95.55(94.62,96.17) | 95.55(94.62,96.17) | 96.44(95.11,96.94) | #1 and 2 | 1.293 | 0.973-1.718 | 0.077        |
|        |                    |                    |                    | #1 and 3 | 1.373 | 0.955-1.974 | 0.087        |
| H19c4  | 95.30(94.51,96.04) | 95.30(94.51,96.04) | 95.74(95.04,96.68) | #1 and 2 | 1.241 | 0.943-1.634 | 0.124        |
|        |                    |                    |                    | #1 and 3 | 1.433 | 0.976-2.103 | 0.066        |
| H19c5  | 96.37(95.68,96.93) | 96.37(95.68,96.93) | 96.65(95.79,97.22) | #1 and 2 | 0.927 | 0.660-1.303 | 0.663        |
|        |                    |                    |                    | #1 and 3 | 1.225 | 0.793-1.892 | 0.361        |
| H19c6  | 96.98(96.09,97.77) | 96.98(96.09,97.77) | 97.29(96.62,97.69) | #1 and 2 | 1.019 | 0.747-1.388 | 0.907        |



|        |                    |                    |                    |          |       |             |       |
|--------|--------------------|--------------------|--------------------|----------|-------|-------------|-------|
|        |                    |                    |                    | #1 and 3 | 1.063 | 0.695-1.624 | 0.779 |
| H19c7  | 97.98(97.12,98.39) | 97.98(97.12,98.39) | 98.04(97.56,98.33) | #1 and 2 | 1.268 | 0.842-1.909 | 0.256 |
|        |                    |                    |                    | #1 and 3 | 1.316 | 0.792-2.187 | 0.289 |
| H19c8  | 97.17(96.44,97.84) | 97.17(96.44,97.84) | 97.34(96.76,97.85) | #1 and 2 | 0.764 | 0.562-1.040 | 0.087 |
|        |                    |                    |                    | #1 and 3 | 1.110 | 0.732-1.684 | 0.623 |
| H19c9  | 93.41(92.16,94.29) | 93.41(92.16,94.29) | 93.87(93.54,94.54) | #1 and 2 | 0.978 | 0.902-1.061 | 0.591 |
|        |                    |                    |                    | #1 and 3 | 0.976 | 0.899-1.060 | 0.565 |
| H19c10 | 96.75(96.05,97.35) | 96.75(96.05,97.35) | 96.77(96.26,97.64) | #1 and 2 | 1.137 | 0.820-1.575 | 0.442 |
|        |                    |                    |                    | #1 and 3 | 1.259 | 0.802-1.976 | 0.317 |
| H19c11 | 89.43(87.62,91.15) | 89.43(87.62,91.15) | 90.32(89.04,91.58) | #1 and 2 | 0.953 | 0.811-1.119 | 0.555 |
|        |                    |                    |                    | #1 and 3 | 1.117 | 0.909-1.373 | 0.291 |
| H19c12 | 97.44(96.85,98.07) | 97.44(96.85,98.07) | 97.51(97.1,98.09)  | #1 and 2 | 1.355 | 0.900-2.040 | 0.146 |
|        |                    |                    |                    | #1 and 3 | 1.191 | 0.711-1.994 | 0.507 |
| H19c13 | 97.91(97.37,98.36) | 97.91(97.37,98.36) | 98.19(97.56,98.60) | #1 and 2 | 1.542 | 0.957-2.486 | 0.075 |
|        |                    |                    |                    | #1 and 3 | 1.471 | 0.807-2.682 | 0.208 |
| H19c14 | 98.29(97.89,98.67) | 98.29(97.89,98.67) | 98.67(98.32,98.78) | #1 and 2 | 0.971 | 0.651-1.449 | 0.887 |
|        |                    |                    |                    | #1 and 3 | 1.995 | 0.932-4.267 | 0.075 |
| H19c15 | 98.01(97.66,98.45) | 98.01(97.66,98.45) | 98.06(97.72,98.56) | #1 and 2 | 1.221 | 0.714-2.087 | 0.466 |
|        |                    |                    |                    | #1 and 3 | 1.119 | 0.555-2.255 | 0.753 |
| H19c16 | 97.75(97.08,97.96) | 97.75(97.08,97.96) | 97.24(97.11,98.02) | #1 and 2 | 1.085 | 0.727-1.619 | 0.691 |
|        |                    |                    |                    | #1 and 3 | 0.863 | 0.515-1.445 | 0.575 |
| H19c17 | 97.61(97.18,98.02) | 97.61(97.18,98.02) | 97.73(97.29,98.38) | #1 and 2 | 0.967 | 0.631-1.480 | 0.876 |
|        |                    |                    |                    | #1 and 3 | 1.261 | 0.717-2.219 | 0.420 |
| H19c18 | 94.72(94.07,95.64) | 94.72(94.07,95.64) | 95.33(94.35,95.69) | #1 and 2 | 1.075 | 0.811-1.424 | 0.616 |
|        |                    |                    |                    | #1 and 3 | 1.173 | 0.821-1.675 | 0.380 |
| H19c19 | 97.04(96.59,97.73) | 97.04(96.59,97.73) | 96.80(96.53,97.47) | #1 and 2 | 1.339 | 0.859-2.088 | 0.198 |

|          |                    |                    |                    |          |       |             |       |
|----------|--------------------|--------------------|--------------------|----------|-------|-------------|-------|
|          |                    |                    |                    | #1 and 3 | 1.029 | 0.603-1.758 | 0.916 |
|          |                    |                    |                    | #1 and 2 | 0.994 | 0.948-1.041 | 0.785 |
| H19d1    | 52.67(47.59,56.89) | 52.67(47.59,56.89) | 51.19(46.42,57.56) | #1 and 3 | 1.006 | 0.954-1.060 | 0.826 |
|          |                    |                    |                    | #1 and 2 | 0.984 | 0.939-1.031 | 0.500 |
| H19d2    | 52.33(48.09,56.71) | 52.33(48.09,56.71) | 52.03(45.53,58.24) | #1 and 3 | 0.996 | 0.938-1.058 | 0.904 |
|          |                    |                    |                    | #1 and 2 | 0.980 | 0.931-1.033 | 0.456 |
| H19d3    | 53.00(50.18,56.27) | 53.00(50.18,56.27) | 50.75(45.79,57.16) | #1 and 3 | 0.987 | 0.925-1.053 | 0.689 |
|          |                    |                    |                    | #1 and 2 | 0.996 | 0.948-1.046 | 0.868 |
| H19d4    | 52.69(49.65,55.29) | 52.69(49.65,55.29) | 51.39(47.39,56.35) | #1 and 3 | 0.991 | 0.932-1.054 | 0.786 |
|          |                    |                    |                    | #1 and 2 | 1.001 | 0.953-1.053 | 0.956 |
| H19d5    | 53.72(50.79,57.04) | 53.72(50.79,57.04) | 52.38(47.71,58.14) | #1 and 3 | 1.006 | 0.945-1.071 | 0.850 |
|          |                    |                    |                    | #1 and 2 | 0.969 | 0.912-1.029 | 0.300 |
| H19d6    | 82.48(78.72,87.73) | 82.48(78.72,87.73) | 82.71(78.93,85.02) | #1 and 3 | 0.975 | 0.903-1.053 | 0.527 |
|          |                    |                    |                    | #1 and 2 | 0.957 | 0.911-1.005 | 0.077 |
| H19d7    | 74.65(69.69,81.48) | 74.65(69.69,81.48) | 71.30(68.89,74.00) | #1 and 3 | 0.960 | 0.906-1.017 | 0.160 |
|          |                    |                    |                    | #1 and 2 | 0.971 | 0.927-1.017 | 0.214 |
| H19d8    | 70.95(64.77,79.63) | 70.95(64.77,79.63) | 69.36(65.33,71.61) | #1 and 3 | 0.978 | 0.924-1.035 | 0.438 |
|          |                    |                    |                    | #1 and 2 | 0.967 | 0.920-1.016 | 0.184 |
| H19d9    | 77.59(70.52,85.11) | 77.59(70.52,85.11) | 75.78(71.6,79.01)  | #1 and 3 | 0.973 | 0.916-1.035 | 0.387 |
|          |                    |                    |                    | #1 and 2 | 1.007 | 0.963-1.053 | 0.757 |
| H19d10   | 61.88(55.95,66.03) | 61.88(55.95,66.03) | 59.59(56.29,64.93) | #1 and 3 | 1.001 | 0.946-1.060 | 0.960 |
|          |                    |                    |                    | #1 and 2 | 1.036 | 0.858-1.250 | 0.714 |
| MALAT1a1 | 33.17(31.89,34.58) | 33.17(31.89,34.58) | 33.33(31.25,34.94) | #1 and 3 | 0.996 | 0.796-1.247 | 0.975 |
|          |                    |                    |                    | #1 and 2 | 1.120 | 0.928-1.353 | 0.238 |
| MALAT1a2 | 25.95(24.95,27.20) | 25.95(24.95,27.20) | 25.88(24.9,26.58)  | #1 and 3 | 0.99  | 0.782-1.254 | 0.934 |
|          |                    |                    |                    | #1 and 2 | 1.154 | 0.943-1.412 | 0.165 |
| MALAT1a3 | 20.00(18.05,20.98) | 20.00(18.05,20.98) | 20.38(19.09,21.84) |          |       |             |       |

|           |                    |                    |                    |          |       |              |              |
|-----------|--------------------|--------------------|--------------------|----------|-------|--------------|--------------|
|           |                    |                    |                    | #1 and 3 | 1.185 | 0.926-1.517  | 0.178        |
|           |                    |                    |                    | #1 and 2 | 1.232 | 0.950-1.598  | 0.116        |
| MALAT1a4  | 11.97(11.21,13.11) | 11.97(11.21,13.11) | 13.18(12.14,14.37) | #1 and 3 | 1.781 | 1.247-2.545  | <b>0.002</b> |
|           |                    |                    |                    | #1 and 2 | 1.10  | 0.734-1.648  | 0.644        |
| MALAT1a5  | 4.94(4.49,5.37)    | 4.94(4.49,5.37)    | 4.79(4.27,5.31)    | #1 and 3 | 0.833 | 0.490-1.417  | 0.501        |
|           |                    |                    |                    | #1 and 2 | 1.087 | 0.885-1.336  | 0.427        |
| MALAT1a6  | 19.57(18.24,21.25) | 19.57(18.24,21.25) | 19.90(19.13,20.78) | #1 and 3 | 1.122 | 0.859-1.466  | 0.397        |
|           |                    |                    |                    | #1 and 2 | 1.136 | 0.920-1.403  | 0.235        |
| MALAT1a7  | 25.17(24.22,26.59) | 25.17(24.22,26.59) | 26.20(24.85,26.91) | #1 and 3 | 1.165 | 0.902-1.504  | 0.242        |
|           |                    |                    |                    | #1 and 2 | 0.973 | 0.795-1.192  | 0.794        |
| MALAT1a8  | 21.43(20.24,22.86) | 21.43(20.24,22.86) | 21.37(20.43,22.93) | #1 and 3 | 0.984 | 0.759-1.276  | 0.902        |
|           |                    |                    |                    | #1 and 2 | 0.991 | 0.806-1.218  | 0.928        |
| MALAT1a9  | 19.71(18.85,20.85) | 19.71(18.85,20.85) | 19.82(18.80,21.01) | #1 and 3 | 0.981 | 0.761-1.266  | 0.884        |
|           |                    |                    |                    | #1 and 2 | 1.223 | 1.015-1.473  | <b>0.035</b> |
| MALAT1a10 | 26.40(25.09,27.41) | 26.40(25.09,27.41) | 26.47(24.86,27.71) | #1 and 3 | 1.019 | 0.811-1.279  | 0.873        |
|           |                    |                    |                    | #1 and 2 | 1.006 | 0.292-3.470  | 0.992        |
| MALAT1b1  | 0.62(0.45,0.82)    | 0.62(0.45,0.82)    | 0.60(0.46,0.85)    | #1 and 3 | 1.062 | 0.228-4.943  | 0.939        |
|           |                    |                    |                    | #1 and 2 | 3.548 | 0.886-14.206 | 0.074        |
| MALAT1b2  | 0.49(0.37,0.70)    | 0.49(0.37,0.70)    | 0.49(0.37,0.60)    | #1 and 3 | 0.432 | 0.057-3.283  | 0.417        |
|           |                    |                    |                    | #1 and 2 | 0.530 | 0.174-1.616  | 0.265        |
| MALAT1b3  | 0.69(0.51,0.91)    | 0.69(0.51,0.91)    | 0.77(0.68,0.96)    | #1 and 3 | 2.072 | 0.504-8.509  | 0.312        |
|           |                    |                    |                    | #1 and 2 | 1.128 | 0.578-2.202  | 0.725        |
| MALAT1b4  | 0.75(0.47,0.95)    | 0.75(0.47,0.95)    | 0.70(0.51,0.90)    | #1 and 3 | 0.686 | 0.178-2.649  | 0.585        |
|           |                    |                    |                    | #1 and 2 | 1.446 | 0.378-5.536  | 0.590        |
| MALAT1b5  | 0.69(0.56,0.87)    | 0.69(0.56,0.87)    | 0.67(0.51,0.93)    | #1 and 3 | 0.987 | 0.177-5.493  | 0.988        |
|           |                    |                    |                    | #1 and 2 | 0.956 | 0.347-2.637  | 0.931        |
| MALAT1b6  | 0.69(0.48,0.92)    | 0.69(0.48,0.92)    | 0.71(0.55,0.92)    |          |       |              |              |

|           |                    |                    |                    |          |       |              |              |
|-----------|--------------------|--------------------|--------------------|----------|-------|--------------|--------------|
|           |                    |                    |                    | #1 and 3 | 1.375 | 0.402-4.706  | 0.612        |
|           |                    |                    |                    | #1 and 2 | 0.543 | 0.164-1.793  | 0.316        |
| MALAT1b7  | 0.75(0.63,0.92)    | 0.75(0.63,0.92)    | 0.80(0.59,1.11)    | #1 and 3 | 2.312 | 0.616-8.674  | 0.214        |
|           |                    |                    |                    | #1 and 2 | 0.205 | 0.058-0.730  | <b>0.014</b> |
| MALAT1b8  | 0.84(0.63,1.14)    | 0.84(0.63,1.14)    | 0.80(0.65,1.04)    | #1 and 3 | 0.780 | 0.175-3.477  | 0.744        |
|           |                    |                    |                    | #1 and 2 | 1.755 | 0.561-5.491  | 0.334        |
| MALAT1b9  | 0.74(0.56,0.89)    | 0.74(0.56,0.89)    | 0.79(0.57,0.92)    | #1 and 3 | 1.557 | 0.391-6.202  | 0.530        |
|           |                    |                    |                    | #1 and 2 | 1.427 | 0.508-4.007  | 0.500        |
| MALAT1b10 | 0.75(0.55,0.93)    | 0.75(0.55,0.93)    | 0.69(0.46,0.85)    | #1 and 3 | 0.604 | 0.152-2.398  | 0.473        |
|           |                    |                    |                    | #1 and 2 | 0.991 | 0.362-2.714  | 0.986        |
| MALAT1b11 | 0.54(0.37,0.80)    | 0.54(0.37,0.80)    | 0.49(0.40,0.76)    | #1 and 3 | 0.855 | 0.214-3.413  | 0.824        |
|           |                    |                    |                    | #1 and 2 | 1.933 | 0.806-4.638  | 0.140        |
| MALAT1b12 | 1.39(1.11,1.64)    | 1.39(1.11,1.64)    | 1.37(1.13,1.66)    | #1 and 3 | 1.255 | 0.430-3.657  | 0.678        |
|           |                    |                    |                    | #1 and 2 | 0.710 | 0.203-2.480  | 0.592        |
| MALAT1b13 | 0.55(0.34,0.74)    | 0.55(0.34,0.74)    | 0.52(0.39,0.72)    | #1 and 3 | 0.678 | 0.119-3.870  | 0.662        |
|           |                    |                    |                    | #1 and 2 | 4.132 | 0.927-18.429 | 0.063        |
| MALAT1b14 | 0.67(0.49,0.79)    | 0.67(0.49,0.79)    | 0.65(0.47,0.81)    | #1 and 3 | 0.748 | 0.113-4.948  | 0.763        |
|           |                    |                    |                    | #1 and 2 | 4.366 | 1.095-17.416 | <b>0.037</b> |
| MALAT1b15 | 0.65(0.48,0.82)    | 0.65(0.48,0.82)    | 0.69(0.55,0.84)    | #1 and 3 | 1.206 | 0.199-7.314  | 0.839        |
|           |                    |                    |                    | #1 and 2 | 0.923 | 0.842-1.012  | 0.088        |
| MALAT1c1  | 69.99(65.89,71.91) | 69.99(65.89,71.91) | 69.53(66.69,72.05) | #1 and 3 | 0.990 | 0.875-1.121  | 0.879        |
|           |                    |                    |                    | #1 and 2 | 0.945 | 0.868-1.029  | 0.191        |
| MALAT1c2  | 74.35(70.70,76.79) | 74.35(70.70,76.79) | 74.77(71.68,76.96) | #1 and 3 | 1.016 | 0.908-1.138  | 0.780        |
|           |                    |                    |                    | #1 and 2 | 0.971 | 0.917-1.028  | 0.312        |
| MALAT1c3  | 67.41(62.76,70.25) | 67.41(62.76,70.25) | 68.49(61.54,72.01) | #1 and 3 | 1.008 | 0.931-1.091  | 0.847        |
|           |                    |                    |                    | #1 and 2 | 0.961 | 0.895-1.033  | 0.280        |
| MALAT1c4  | 70.01(66.10,71.83) | 70.01(66.10,71.83) | 70.32(66.67,73.72) |          |       |              |              |

|          |                    |                    |                    |          |       |             |       |
|----------|--------------------|--------------------|--------------------|----------|-------|-------------|-------|
|          |                    |                    |                    | #1 and 3 | 1.009 | 0.916-1.110 | 0.862 |
| MALAT1c5 | 75.7(72.15,78.07)  | 75.7(72.15,78.07)  | 76.72(72.14,79.34) | #1 and 2 | 0.955 | 0.886-1.029 | 0.225 |
|          |                    |                    |                    | #1 and 3 | 1.020 | 0.919-1.132 | 0.708 |
| MALAT1c6 | 79.69(77.32,82.44) | 79.69(77.32,82.44) | 81.44(77.58,82.63) | #1 and 2 | 0.944 | 0.865-1.030 | 0.197 |
|          |                    |                    |                    | #1 and 3 | 1.022 | 0.905-1.153 | 0.729 |

\*Adjusted for age, gender, smoking and drinking. a: Methylation level is expressed as a percentage. Data was expressed as median (P25, P75). NA: Negative; L OR V: Lymph node or Visceral metastasis; L AND V: Lymph node and Visceral metastasis. 1 = NA; 2 = L or V; 3 = L and V. #1: 1 as reference.

**Table S9. Differences of methylation levels of H19, MALAT1 promoters in tumors from GC patients with different BMI\***

|                | Name               | Methylation level <sup>a</sup> |                    | Logistic regression analysis |              |              |
|----------------|--------------------|--------------------------------|--------------------|------------------------------|--------------|--------------|
|                |                    | Underweight to Normal          | Overweight/Obese   | Odds Ratio                   | 95%CI        | P-value      |
| <b>Genes</b>   | H19                | 76.60(75.65,77.43)             | 76.72(75.74,77.49) | 1.034                        | 0.795-1.343  | 0.804        |
|                | MALAT1             | 8.87(8.68,9.04)                | 8.86(8.67,9.08)    | 0.562                        | 0.153-2.059  | 0.384        |
| <b>Regions</b> | H19A               | 46.74(45.78,47.93)             | 46.80(45.04,48.44) | 0.999                        | 0.858-1.162  | 0.986        |
|                | H19B               | 92.79(91.60,94.65)             | 94.29(92.09,94.66) | 1.091                        | 0.889-1.338  | 0.405        |
|                | H19C               | 95.67(95.32,96.02)             | 95.83(95.58,96.08) | 1.764                        | 0.871-3.573  | 0.115        |
|                | H19D               | 63.01(59.21,66.91)             | 63.20(57.88,66.35) | 1.008                        | 0.948-1.071  | 0.800        |
|                | MALAT1A            | 21.04(20.51,21.47)             | 20.94(20.50,21.61) | 0.774                        | 0.461-1.298  | 0.331        |
|                | MALAT1B            | 0.75(0.70,0.79)                | 0.74(0.69,0.82)    | 2.524                        | 0.075-84.431 | 0.605        |
|                | MALAT1C            | 72.60(69.29,75.01)             | 71.31(67.27,73.61) | 0.922                        | 0.851-0.999  | <b>0.047</b> |
| <b>Sites</b>   | H19a1              | 43.15(41.85,44.72)             | 43.52(41.08,45.26) | 1.010                        | 0.877-1.162  | 0.895        |
|                | H19a2              | 44.22(43.12,46.03)             | 44.24(42.67,45.95) | 0.950                        | 0.877-1.029  | 0.210        |
|                | H19a3              | 45.65(44.54,46.96)             | 45.49(44.53,47.19) | 1.037                        | 0.899-1.196  | 0.616        |
|                | H19a4              | 45.22(43.95,46.74)             | 45.07(43.37,46.67) | 0.951                        | 0.821-1.101  | 0.499        |
|                | H19a5              | 45.28(44.07,46.97)             | 45.40(43.43,47.37) | 1.011                        | 0.878-1.164  | 0.880        |
|                | H19a6              | 45.64(44.56,47.17)             | 45.69(44.40,47.34) | 1.017                        | 0.881-1.175  | 0.818        |
|                | H19a7              | 45.71(44.46,47.18)             | 45.60(44.06,47.54) | 0.960                        | 0.888-1.038  | 0.302        |
|                | H19a8              | 46.39(45.18,47.89)             | 46.65(44.93,48.08) | 1.025                        | 0.886-1.186  | 0.736        |
|                | H19a9              | 47.19(46.15,48.58)             | 47.46(46.08,49.16) | 1.040                        | 0.889-1.216  | 0.626        |
|                | H19a10             | 47.3(46.32,48.54)              | 47.41(46.01,48.95) | 1.053                        | 0.900-1.232  | 0.521        |
|                | H19a11             | 47.49(46.29,48.63)             | 47.59(46.34,49.28) | 1.038                        | 0.888-1.213  | 0.64         |
|                | H19a12             | 47.22(45.93,48.67)             | 47.38(45.94,48.96) | 1.064                        | 0.923-1.227  | 0.395        |
|                | H19a13             | 48.79(47.50,50.14)             | 48.61(47.11,50.78) | 1.043                        | 0.902-1.206  | 0.572        |
|                | H19a14             | 49.10(47.92,50.59)             | 49.12(48.15,50.90) | 1.061                        | 0.919-1.225  | 0.419        |
|                | H19a15             | 49.07(48.13,50.55)             | 49.10(47.79,51.16) | 1.043                        | 0.895-1.216  | 0.590        |
|                | H19a16             | 48.93(48.09,50.78)             | 49.29(47.45,51.11) | 1.000                        | 0.860-1.162  | 0.998        |
|                | H19b1              | 52.27(47.09,88.95)             | 86.77(46.32,88.91) | 1.010                        | 0.995-1.025  | 0.188        |
|                | H19b2              | 97.40(97.02,97.87)             | 97.45(96.92,97.74) | 0.704                        | 0.385-1.287  | 0.254        |
|                | H19b3              | 96.41(95.88,96.89)             | 96.12(95.78,96.58) | 0.654                        | 0.381-1.121  | 0.122        |
|                | H19b4              | 89.24(88.32,90.62)             | 88.90(87.35,89.59) | 0.959                        | 0.899-1.022  | 0.200        |
|                | H19b5              | 93.75(92.85,94.47)             | 93.46(92.72,93.97) | 0.696                        | 0.485-0.999  | 0.049        |
|                | H19b6              | 98.04(97.62,98.32)             | 97.90(97.62,98.21) | 0.752                        | 0.360-1.571  | 0.448        |
|                | H19b7              | 92.45(91.30,93.23)             | 92.64(90.87,93.47) | 0.966                        | 0.738-1.263  | 0.798        |
|                | H19b8              | 96.28(95.87,96.74)             | 96.03(95.68,96.42) | 0.872                        | 0.599-1.269  | 0.474        |
|                | H19b9              | 94.58(93.75,95.53)             | 94.83(93.99,95.65) | 1.054                        | 0.810-1.370  | 0.697        |
|                | H19b10             | 97.34(96.95,97.76)             | 97.50(96.95,97.80) | 1.128                        | 0.650-1.955  | 0.669        |
|                | H19b11             | 90.67(89.87,91.46)             | 90.58(89.48,91.73) | 0.954                        | 0.750-1.214  | 0.703        |
|                | H19b12             | 97.04(96.59,97.44)             | 97.22(96.85,97.69) | 1.533                        | 0.866-2.715  | 0.143        |
| H19b13         | 96.76(96.27,97.22) | 96.60(96.19,97.15)             | 0.699              | 0.408-1.197                  | 0.192        |              |
| H19b14         | 95.31(94.56,95.90) | 95.29(94.85,96.16)             | 1.069              | 0.756-1.512                  | 0.706        |              |

|           |                    |                    |       |             |              |
|-----------|--------------------|--------------------|-------|-------------|--------------|
| H19b15    | 97.71(97.19,98.00) | 97.71(97.34,98.13) | 1.011 | 0.521-1.962 | 0.973        |
| H19c1     | 93.72(92.99,94.71) | 93.99(92.40,94.63) | 0.980 | 0.765-1.254 | 0.871        |
| H19c2     | 86.48(84.53,88.48) | 87.22(86.00,89.00) | 1.164 | 1.003-1.349 | <b>0.045</b> |
| H19c3     | 95.78(94.74,96.54) | 95.93(95.38,96.58) | 1.048 | 0.790-1.392 | 0.743        |
| H19c4     | 95.51(94.62,96.29) | 95.98(95.10,96.64) | 1.457 | 1.056-2.010 | <b>0.022</b> |
| H19c5     | 96.35(95.55,96.94) | 96.31(95.42,96.83) | 0.893 | 0.628-1.270 | 0.529        |
| H19c6     | 97.02(96.44,97.60) | 97.04(96.12,97.74) | 1.144 | 0.814-1.609 | 0.438        |
| H19c7     | 97.92(97.38,98.33) | 98.12(97.34,98.66) | 1.219 | 0.797-1.864 | 0.362        |
| H19c8     | 96.96(96.46,97.51) | 97.04(96.53,98.13) | 1.320 | 0.937-1.858 | 0.112        |
| H19c9     | 93.59(92.58,94.47) | 93.71(92.71,94.23) | 1.130 | 0.901-1.418 | 0.290        |
| H19c10    | 96.81(96.23,97.44) | 96.79(96.04,97.65) | 0.993 | 0.707-1.394 | 0.968        |
| H19c11    | 89.57(87.58,91.21) | 89.48(88.22,91.18) | 1.087 | 0.922-1.281 | 0.320        |
| H19c12    | 97.49(97.16,98.09) | 97.54(96.87,97.82) | 0.768 | 0.515-1.148 | 0.198        |
| H19c13    | 98.01(97.53,98.55) | 97.97(97.55,98.62) | 0.996 | 0.621-1.598 | 0.986        |
| H19c14    | 98.43(98.03,98.78) | 98.36(97.82,98.93) | 0.905 | 0.580-1.413 | 0.660        |
| H19c15    | 98.18(97.78,98.53) | 98.08(97.72,98.44) | 0.882 | 0.509-1.529 | 0.655        |
| H19c16    | 97.61(97.12,97.94) | 97.75(97.06,98.41) | 1.022 | 0.678-1.542 | 0.917        |
| H19c17    | 97.65(97.20,98.09) | 97.73(97.36,98.07) | 1.157 | 0.749-1.787 | 0.512        |
| H19c18    | 95.08(94.20,95.70) | 94.79(94.01,95.67) | 0.932 | 0.703-1.236 | 0.626        |
| H19c19    | 97.23(96.68,97.61) | 97.12(96.56,97.56) | 0.765 | 0.494-1.185 | 0.230        |
| H19d1     | 52.67(47.46,56.69) | 54.69(46.02,59.34) | 1.031 | 0.984-1.080 | 0.197        |
| H19d2     | 52.50(47.95,57.14) | 52.33(48.56,56.90) | 1.021 | 0.973-1.071 | 0.405        |
| H19d3     | 53.00(49.15,56.99) | 51.22(48.61,57.45) | 1.001 | 0.950-1.054 | 0.977        |
| H19d4     | 52.69(49.18,56.65) | 52.23(48.78,55.62) | 1.004 | 0.955-1.055 | 0.881        |
| H19d5     | 53.72(49.15,57.90) | 54.72(50.89,58.14) | 1.021 | 0.969-1.075 | 0.441        |
| H19d6     | 82.48(79.17,86.42) | 84.44(76.00,88.89) | 1.015 | 0.955-1.078 | 0.636        |
| H19d7     | 73.55(70.00,80.00) | 72.22(65.35,79.17) | 0.987 | 0.945-1.030 | 0.538        |
| H19d8     | 70.66(65.98,77.42) | 69.54(62.98,74.29) | 0.984 | 0.940-1.029 | 0.477        |
| H19d9     | 76.85(72.29,82.09) | 74.93(69.23,85.04) | 1.006 | 0.957-1.056 | 0.820        |
| H19d10    | 61.88(57.58,66.67) | 62.64(54.55,66.29) | 0.992 | 0.949-1.038 | 0.738        |
| MALAT1a1  | 33.17(32.00,34.47) | 33.17(31.51,35.39) | 0.991 | 0.825-1.190 | 0.922        |
| MALAT1a2  | 26.28(24.91,27.46) | 25.69(24.48,27.17) | 0.874 | 0.722-1.059 | 0.168        |
| MALAT1a3  | 20.05(18.89,20.99) | 20.36(19.23,21.50) | 0.984 | 0.807-1.201 | 0.877        |
| MALAT1a4  | 12.35(11.58,13.55) | 12.37(11.28,13.10) | 0.913 | 0.713-1.170 | 0.473        |
| MALAT1a5  | 4.94(4.48,5.51)    | 4.97(4.43,5.77)    | 1.144 | 0.753-1.737 | 0.528        |
| MALAT1a6  | 19.77(18.74,21.08) | 19.78(18.71,21.26) | 1.028 | 0.831-1.272 | 0.799        |
| MALAT1a7  | 25.77(24.63,27.12) | 25.50(24.63,26.40) | 0.832 | 0.668-1.035 | 0.098        |
| MALAT1a8  | 21.37(20.23,22.74) | 21.88(20.76,22.33) | 1.037 | 0.839-1.282 | 0.738        |
| MALAT1a9  | 19.88(18.91,20.90) | 19.48(17.84,20.51) | 0.912 | 0.737-1.128 | 0.396        |
| MALAT1a10 | 26.56(25.03,27.82) | 26.40(25.51,27.39) | 1.005 | 0.840-1.203 | 0.958        |
| MALAT1b1  | 0.63(0.43,0.85)    | 0.64(0.51,0.91)    | 2.217 | 0.628-7.820 | 0.216        |
| MALAT1b2  | 0.55(0.41,0.71)    | 0.49(0.39,0.75)    | 0.941 | 0.281-3.147 | 0.921        |
| MALAT1b3  | 0.75(0.54,0.90)    | 0.65(0.52,0.89)    | 0.766 | 0.240-2.445 | 0.653        |
| MALAT1b4  | 0.71(0.48,0.92)    | 0.63(0.47,0.95)    | 0.882 | 0.415-1.876 | 0.745        |

|           |                    |                    |       |             |              |
|-----------|--------------------|--------------------|-------|-------------|--------------|
| MALAT1b5  | 0.69(0.55,0.88)    | 0.67(0.52,0.95)    | 1.337 | 0.358-4.984 | 0.666        |
| MALAT1b6  | 0.74(0.51,0.92)    | 0.65(0.50,0.92)    | 1.140 | 0.424-3.064 | 0.796        |
| MALAT1b7  | 0.72(0.55,0.88)    | 0.75(0.59,1.07)    | 3.683 | 1.16-11.691 | <b>0.027</b> |
| MALAT1b8  | 0.81(0.59,1.03)    | 0.75(0.64,0.95)    | 0.791 | 0.236-2.654 | 0.704        |
| MALAT1b9  | 0.76(0.56,0.92)    | 0.72(0.44,0.92)    | 0.749 | 0.246-2.285 | 0.612        |
| MALAT1b10 | 0.73(0.52,0.93)    | 0.73(0.51,1.00)    | 1.299 | 0.462-3.651 | 0.620        |
| MALAT1b11 | 0.52(0.35,0.75)    | 0.52(0.39,0.81)    | 1.274 | 0.472-3.438 | 0.633        |
| MALAT1b12 | 1.40(1.13,1.63)    | 1.38(1.12,1.69)    | 1.064 | 0.455-2.492 | 0.886        |
| MALAT1b13 | 0.55(0.35,0.75)    | 0.52(0.35,0.70)    | 0.398 | 0.095-1.675 | 0.209        |
| MALAT1b14 | 0.72(0.55,0.85)    | 0.66(0.46,0.83)    | 0.833 | 0.198-3.503 | 0.803        |
| MALAT1b15 | 0.70(0.54,0.86)    | 0.69(0.53,0.87)    | 0.977 | 0.417-2.290 | 0.958        |
| MALAT1c1  | 69.55(66.44,71.42) | 68.03(63.98,71.17) | 0.929 | 0.847-1.019 | 0.120        |
| MALAT1c2  | 74.33(71.16,76.87) | 72.93(69.81,75.77) | 0.926 | 0.850-1.009 | 0.079        |
| MALAT1c3  | 67.47(62.84,71.45) | 66.60(59.95,68.75) | 0.932 | 0.878-0.990 | <b>0.022</b> |
| MALAT1c4  | 69.99(66.77,72.27) | 68.77(65.73,71.60) | 0.948 | 0.884-1.017 | 0.135        |
| MALAT1c5  | 75.64(72.24,78.86) | 74.86(70.76,76.74) | 0.937 | 0.872-1.008 | 0.080        |
| MALAT1c6  | 79.81(77.31,82.57) | 79.33(76.92,81.25) | 0.907 | 0.830-0.991 | <b>0.031</b> |

\*Adjusted for age, gender, smoking and drinking. a: Methylation level is expressed as a percentage. Data was expressed as median (P<sub>25</sub>, P<sub>75</sub>).



**Table S10. Differences of methylation levels of H19, MALAT1 promoters in GC tumors arising in the upper third, middle third, and diffused type\***

| Name         | Methylation level <sup>a</sup> |              |             |               | Logistic regression analysis | Odds Ratio     | 95%CI  | P-value       |              |  |  |          |       |             |       |
|--------------|--------------------------------|--------------|-------------|---------------|------------------------------|----------------|--------|---------------|--------------|--|--|----------|-------|-------------|-------|
|              | Upper third                    | Middle third | Lower third | Diffused type |                              |                |        |               |              |  |  |          |       |             |       |
| <b>Genes</b> |                                |              |             |               |                              | #1 and 2       | 0.798  | 0.584-1.090   | 0.156        |  |  |          |       |             |       |
|              |                                |              |             |               |                              | #1 and 3       | 0.907  | 0.673-1.222   | 0.522        |  |  |          |       |             |       |
|              |                                |              |             |               |                              | #1 and 4       | 0.835  | 0.566-1.233   | 0.364        |  |  |          |       |             |       |
|              |                                |              |             |               |                              | #2 and 3       | 1.137  | 0.830-1.557   | 0.424        |  |  |          |       |             |       |
|              |                                |              |             |               |                              | #2 and 4       | 1.047  | 0.699-1.566   | 0.825        |  |  |          |       |             |       |
|              |                                |              |             |               |                              | #3 and 4       | 0.921  | 0.621-1.366   | 0.681        |  |  |          |       |             |       |
|              |                                |              |             |               |                              | #1 and 2       | 0.253  | 0.051-1.243   | 0.091        |  |  |          |       |             |       |
|              |                                |              |             |               |                              | #1 and 3       | 0.246  | 0.053-1.148   | 0.074        |  |  |          |       |             |       |
|              |                                |              |             |               |                              | #1 and 4       | 5.161  | 0.676-39.371  | 0.113        |  |  |          |       |             |       |
|              |                                |              |             |               |                              | #2 and 3       | 0.972  | 0.193-4.884   | 0.972        |  |  |          |       |             |       |
|              |                                |              |             |               |                              | #2 and 4       | 20.430 | 2.282-182.374 | <b>0.007</b> |  |  |          |       |             |       |
|              |                                |              |             |               |                              | #3 and 4       | 21.001 | 2.444-180.446 | <b>0.006</b> |  |  |          |       |             |       |
|              |                                |              |             |               |                              | <b>Regions</b> |        |               |              |  |  | #1 and 2 | 0.919 | 0.767-1.100 | 0.354 |
|              |                                |              |             |               |                              |                |        |               |              |  |  | #1 and 3 | 0.976 | 0.824-1.156 | 0.780 |
| #1 and 4     | 0.872                          | 0.695-1.095  | 0.238       |               |                              |                |        |               |              |  |  |          |       |             |       |
| #2 and 3     | 1.063                          | 0.877-1.288  | 0.534       |               |                              |                |        |               |              |  |  |          |       |             |       |
| #2 and 4     | 0.949                          | 0.746-1.208  | 0.672       |               |                              |                |        |               |              |  |  |          |       |             |       |
| #3 and 4     | 0.893                          | 0.705-1.131  | 0.349       |               |                              |                |        |               |              |  |  |          |       |             |       |
| #1 and 2     | 1.017                          | 0.802-1.289  | 0.890       |               |                              |                |        |               |              |  |  |          |       |             |       |
| #1 and 3     | 0.893                          | 0.713-1.118  | 0.323       |               |                              |                |        |               |              |  |  |          |       |             |       |
| #1 and 4     | 0.838                          | 0.631-1.113  | 0.223       |               |                              |                |        |               |              |  |  |          |       |             |       |
| #2 and 3     | 0.878                          | 0.693-1.112  | 0.281       |               |                              |                |        |               |              |  |  |          |       |             |       |

|         |                    |                    |                    |                    |          |       |               |              |
|---------|--------------------|--------------------|--------------------|--------------------|----------|-------|---------------|--------------|
|         |                    |                    |                    |                    | #2 and 4 | 0.824 | 0.613-1.108   | 0.200        |
|         |                    |                    |                    |                    | #3 and 4 | 0.939 | 0.708-1.244   | 0.659        |
|         |                    |                    |                    |                    | #1 and 2 | 0.730 | 0.345-1.548   | 0.412        |
|         |                    |                    |                    |                    | #1 and 3 | 0.857 | 0.413-1.778   | 0.679        |
| H19C    | 95.72(95.40,96.02) | 95.64(95.33,95.96) | 95.88(95.26,96.15) | 95.65(95.59,95.96) | #1 and 4 | 0.720 | 0.294-1.766   | 0.473        |
|         |                    |                    |                    |                    | #2 and 3 | 1.173 | 0.555-2.479   | 0.675        |
|         |                    |                    |                    |                    | #2 and 4 | 0.986 | 0.395-2.463   | 0.976        |
|         |                    |                    |                    |                    | #3 and 4 | 0.840 | 0.343-2.056   | 0.703        |
|         |                    |                    |                    |                    | #1 and 2 | 0.973 | 0.905-1.046   | 0.463        |
|         |                    |                    |                    |                    | #1 and 3 | 0.993 | 0.924-1.067   | 0.850        |
| H19D    | 63.32(59.14,67.56) | 62.84(57.85,66.10) | 63.01(58.76,67.33) | 64.69(59.10,67.03) | #1 and 4 | 1.004 | 0.913-1.105   | 0.929        |
|         |                    |                    |                    |                    | #2 and 3 | 1.020 | 0.950-1.096   | 0.581        |
|         |                    |                    |                    |                    | #2 and 4 | 1.032 | 0.936-1.137   | 0.527        |
|         |                    |                    |                    |                    | #3 and 4 | 1.011 | 0.919-1.113   | 0.818        |
|         |                    |                    |                    |                    | #1 and 2 | 0.596 | 0.318-1.118   | 0.107        |
|         |                    |                    |                    |                    | #1 and 3 | 0.574 | 0.311-1.059   | 0.075        |
| MALAT1A | 21.13(20.58,21.76) | 20.84(20.46,21.47) | 20.78(20.5,21.34)  | 21.42(21.21,22.01) | #1 and 4 | 2.042 | 0.907-4.596   | 0.085        |
|         |                    |                    |                    |                    | #2 and 3 | 0.963 | 0.507-1.831   | 0.909        |
|         |                    |                    |                    |                    | #2 and 4 | 3.426 | 1.431-8.199   | <b>0.006</b> |
|         |                    |                    |                    |                    | #3 and 4 | 3.556 | 1.505-8.403   | <b>0.004</b> |
|         |                    |                    |                    |                    | #1 and 2 | 0.552 | 0.009-32.691  | 0.775        |
|         |                    |                    |                    |                    | #1 and 3 | 1.085 | 0.022-53.677  | 0.967        |
| MALAT1B | 0.76(0.69,0.81)    | 0.76(0.72,0.81)    | 0.74(0.69,0.79)    | 0.74(0.70,0.77)    | #1 and 4 | 0.119 | 0.000-49.579  | 0.489        |
|         |                    |                    |                    |                    | #2 and 3 | 1.965 | 0.027-143.618 | 0.758        |
|         |                    |                    |                    |                    | #2 and 4 | 0.215 | 0.000-115.020 | 0.632        |

| Sites   |                    |                    |                    |                    |  |          |       |              |       |
|---------|--------------------|--------------------|--------------------|--------------------|--|----------|-------|--------------|-------|
|         |                    |                    |                    |                    |  | #3 and 4 | 0.110 | 0.000-51.511 | 0.481 |
|         |                    |                    |                    |                    |  | #1 and 2 | 1.046 | 0.955-1.145  | 0.337 |
|         |                    |                    |                    |                    |  | #1 and 3 | 1.004 | 0.919-1.097  | 0.924 |
|         |                    |                    |                    |                    |  | #1 and 4 | 0.985 | 0.875-1.109  | 0.804 |
|         |                    |                    |                    |                    |  | #2 and 3 | 0.961 | 0.872-1.058  | 0.414 |
|         |                    |                    |                    |                    |  | #2 and 4 | 0.942 | 0.830-1.069  | 0.356 |
|         |                    |                    |                    |                    |  | #3 and 4 | 0.981 | 0.866-1.111  | 0.760 |
|         |                    |                    |                    |                    |  | #1 and 2 | 0.886 | 0.746-1.053  | 0.170 |
|         |                    |                    |                    |                    |  | #1 and 3 | 0.941 | 0.805-1.101  | 0.450 |
|         |                    |                    |                    |                    |  | #1 and 4 | 0.890 | 0.718-1.102  | 0.284 |
|         |                    |                    |                    |                    |  | #2 and 3 | 1.062 | 0.885-1.275  | 0.515 |
|         |                    |                    |                    |                    |  | #2 and 4 | 1.004 | 0.797-1.265  | 0.974 |
|         |                    |                    |                    |                    |  | #3 and 4 | 0.945 | 0.757-1.180  | 0.616 |
|         |                    |                    |                    |                    |  | #1 and 2 | 0.994 | 0.920-1.075  | 0.883 |
|         |                    |                    |                    |                    |  | #1 and 3 | 1.035 | 0.941-1.139  | 0.475 |
|         |                    |                    |                    |                    |  | #1 and 4 | 1.012 | 0.902-1.135  | 0.839 |
|         |                    |                    |                    |                    |  | #2 and 3 | 1.041 | 0.957-1.133  | 0.347 |
|         |                    |                    |                    |                    |  | #2 and 4 | 1.018 | 0.916-1.131  | 0.740 |
|         |                    |                    |                    |                    |  | #3 and 4 | 0.977 | 0.868-1.101  | 0.707 |
|         |                    |                    |                    |                    |  | #1 and 2 | 0.896 | 0.749-1.071  | 0.226 |
|         |                    |                    |                    |                    |  | #1 and 3 | 0.929 | 0.790-1.094  | 0.377 |
|         |                    |                    |                    |                    |  | #1 and 4 | 0.858 | 0.680-1.083  | 0.197 |
|         |                    |                    |                    |                    |  | #2 and 3 | 1.037 | 0.856-1.257  | 0.707 |
|         |                    |                    |                    |                    |  | #2 and 4 | 0.958 | 0.746-1.230  | 0.736 |
|         |                    |                    |                    |                    |  | #3 and 4 | 0.923 | 0.726-1.175  | 0.517 |
| MALAT1C | 72.62(68.16,74.66) | 72.08(69.89,74.45) | 72.87(67.81,74.88) | 72.00(67.80,73.04) |  |          |       |              |       |
| H19a1   | 43.47(41.67,45.10) | 43.00(41.62,44.61) | 43.50(41.77,45.50) | 42.74(41.90,43.32) |  |          |       |              |       |
| H19a2   | 44.65(43.35,46.63) | 43.99(42.94,45.44) | 44.78(42.83,46.35) | 43.99(42.86,44.82) |  |          |       |              |       |
| H19a3   | 45.65(44.68,47.38) | 45.73(44.42,47.11) | 45.78(44.55,47.17) | 45.27(44.02,45.92) |  |          |       |              |       |

|       |                    |                    |                    |                    |          |       |             |       |
|-------|--------------------|--------------------|--------------------|--------------------|----------|-------|-------------|-------|
|       |                    |                    |                    |                    | #1 and 2 | 0.968 | 0.817-1.146 | 0.703 |
|       |                    |                    |                    |                    | #1 and 3 | 1.011 | 0.860-1.188 | 0.898 |
| H19a4 | 45.40(43.94,47.12) | 45.25(44.12,46.42) | 45.48(43.81,47.00) | 44.65(43.69,45.40) | #1 and 4 | 0.910 | 0.730-1.133 | 0.399 |
|       |                    |                    |                    |                    | #2 and 3 | 1.044 | 0.873-1.249 | 0.634 |
|       |                    |                    |                    |                    | #2 and 4 | 0.940 | 0.746-1.184 | 0.600 |
|       |                    |                    |                    |                    | #3 and 4 | 0.900 | 0.717-1.129 | 0.363 |
|       |                    |                    |                    |                    | #1 and 2 | 0.888 | 0.750-1.053 | 0.171 |
|       |                    |                    |                    |                    | #1 and 3 | 0.920 | 0.783-1.082 | 0.314 |
| H19a5 | 45.40(43.96,47.46) | 45.41(44.20,46.55) | 45.54(44.07,47.04) | 44.72(43.89,45.17) | #1 and 4 | 0.871 | 0.700-1.083 | 0.213 |
|       |                    |                    |                    |                    | #2 and 3 | 1.036 | 0.864-1.242 | 0.702 |
|       |                    |                    |                    |                    | #2 and 4 | 0.980 | 0.778-1.234 | 0.864 |
|       |                    |                    |                    |                    | #3 and 4 | 0.946 | 0.755-1.185 | 0.629 |
|       |                    |                    |                    |                    | #1 and 2 | 0.911 | 0.765-1.086 | 0.299 |
|       |                    |                    |                    |                    | #1 and 3 | 0.925 | 0.784-1.091 | 0.355 |
| H19a6 | 45.77(44.57,47.62) | 46.02(44.52,47.09) | 45.68(44.78,47.29) | 45.12(44.10,45.63) | #1 and 4 | 0.853 | 0.682-1.068 | 0.165 |
|       |                    |                    |                    |                    | #2 and 3 | 1.015 | 0.842-1.224 | 0.877 |
|       |                    |                    |                    |                    | #2 and 4 | 0.936 | 0.739-1.186 | 0.585 |
|       |                    |                    |                    |                    | #3 and 4 | 0.922 | 0.733-1.160 | 0.490 |
|       |                    |                    |                    |                    | #1 and 2 | 0.890 | 0.771-1.028 | 0.113 |
|       |                    |                    |                    |                    | #1 and 3 | 0.944 | 0.816-1.094 | 0.445 |
| H19a7 | 45.84(44.43,47.43) | 45.80(44.81,47.20) | 45.83(44.46,47.57) | 45.02(43.92,45.42) | #1 and 4 | 0.906 | 0.775-1.058 | 0.212 |
|       |                    |                    |                    |                    | #2 and 3 | 1.061 | 0.937-1.202 | 0.351 |
|       |                    |                    |                    |                    | #2 and 4 | 1.017 | 0.921-1.123 | 0.734 |
|       |                    |                    |                    |                    | #3 and 4 | 0.959 | 0.834-1.102 | 0.554 |
| H19a8 | 46.53(45.10,48.40) | 46.43(45.40,47.78) | 46.63(44.99,48.34) | 45.85(44.72,46.63) | #1 and 2 | 0.891 | 0.743-1.068 | 0.210 |
|       |                    |                    |                    |                    | #1 and 3 | 0.929 | 0.786-1.097 | 0.385 |

|        |                    |                    |                    |                    |          |       |             |       |
|--------|--------------------|--------------------|--------------------|--------------------|----------|-------|-------------|-------|
|        |                    |                    |                    |                    | #1 and 4 | 0.830 | 0.654-1.053 | 0.126 |
|        |                    |                    |                    |                    | #2 and 3 | 1.043 | 0.858-1.267 | 0.672 |
|        |                    |                    |                    |                    | #2 and 4 | 0.932 | 0.723-1.201 | 0.587 |
|        |                    |                    |                    |                    | #3 and 4 | 0.894 | 0.699-1.143 | 0.370 |
|        |                    |                    |                    |                    | #1 and 2 | 0.968 | 0.805-1.165 | 0.732 |
|        |                    |                    |                    |                    | #1 and 3 | 0.964 | 0.808-1.149 | 0.679 |
| H19a9  | 47.36(46.06,48.84) | 47.65(46.12,49.04) | 47.51(46.22,49.33) | 46.61(46.02,46.92) | #1 and 4 | 0.836 | 0.660-1.057 | 0.135 |
|        |                    |                    |                    |                    | #2 and 3 | 0.995 | 0.818-1.210 | 0.961 |
|        |                    |                    |                    |                    | #2 and 4 | 0.863 | 0.673-1.107 | 0.246 |
|        |                    |                    |                    |                    | #3 and 4 | 0.867 | 0.682-1.103 | 0.247 |
|        |                    |                    |                    |                    | #1 and 2 | 0.958 | 0.797-1.153 | 0.652 |
|        |                    |                    |                    |                    | #1 and 3 | 0.976 | 0.820-1.162 | 0.784 |
| H19a10 | 47.28(46.03,48.82) | 47.54(46.50,48.60) | 47.68(46.47,49.21) | 46.48(46.07,46.96) | #1 and 4 | 0.849 | 0.671-1.075 | 0.174 |
|        |                    |                    |                    |                    | #2 and 3 | 1.018 | 0.837-1.239 | 0.857 |
|        |                    |                    |                    |                    | #2 and 4 | 0.886 | 0.690-1.137 | 0.342 |
|        |                    |                    |                    |                    | #3 and 4 | 0.870 | 0.682-1.110 | 0.262 |
|        |                    |                    |                    |                    | #1 and 2 | 0.982 | 0.820-1.176 | 0.840 |
|        |                    |                    |                    |                    | #1 and 3 | 1.002 | 0.844-1.190 | 0.982 |
| H19a11 | 47.49(46.49,49.00) | 47.80(46.15,48.74) | 48.02(46.54,49.15) | 46.52(45.95,47.53) | #1 and 4 | 0.895 | 0.716-1.118 | 0.329 |
|        |                    |                    |                    |                    | #2 and 3 | 1.021 | 0.844-1.234 | 0.832 |
|        |                    |                    |                    |                    | #2 and 4 | 0.912 | 0.720-1.155 | 0.445 |
|        |                    |                    |                    |                    | #3 and 4 | 0.893 | 0.709-1.125 | 0.337 |
|        |                    |                    |                    |                    | #1 and 2 | 0.898 | 0.776-1.041 | 0.153 |
| H19a12 | 47.24(46.09,48.77) | 47.36(45.71,48.40) | 47.75(45.80,49.38) | 46.49(45.86,47.26) | #1 and 3 | 0.983 | 0.841-1.148 | 0.825 |
|        |                    |                    |                    |                    | #1 and 4 | 0.883 | 0.735-1.061 | 0.185 |
|        |                    |                    |                    |                    | #2 and 3 | 1.094 | 0.927-1.291 | 0.289 |

|        |                    |                    |                    |                    |          |       |             |       |
|--------|--------------------|--------------------|--------------------|--------------------|----------|-------|-------------|-------|
|        |                    |                    |                    |                    | #2 and 4 | 0.983 | 0.822-1.174 | 0.848 |
|        |                    |                    |                    |                    | #3 and 4 | 0.899 | 0.737-1.095 | 0.289 |
|        |                    |                    |                    |                    | #1 and 2 | 0.899 | 0.737-1.095 | 0.289 |
|        |                    |                    |                    |                    | #1 and 3 | 0.976 | 0.831-1.148 | 0.773 |
| H19a13 | 48.77(47.47,50.54) | 48.90(47.84,49.91) | 49.22(47.09,50.69) | 47.87(47.43,48.51) | #1 and 4 | 0.874 | 0.705-1.084 | 0.220 |
|        |                    |                    |                    |                    | #2 and 3 | 1.006 | 0.840-1.204 | 0.948 |
|        |                    |                    |                    |                    | #2 and 4 | 0.901 | 0.718-1.130 | 0.367 |
|        |                    |                    |                    |                    | #3 and 4 | 0.895 | 0.717-1.117 | 0.328 |
|        |                    |                    |                    |                    | #1 and 2 | 0.973 | 0.833-1.138 | 0.735 |
|        |                    |                    |                    |                    | #1 and 3 | 1.015 | 0.869-1.186 | 0.848 |
| H19a14 | 49.03(47.76,50.32) | 49.66(47.93,50.71) | 49.67(48.19,51.33) | 48.44(48.04,48.87) | #1 and 4 | 0.914 | 0.751-1.113 | 0.373 |
|        |                    |                    |                    |                    | #2 and 3 | 1.043 | 0.878-1.239 | 0.632 |
|        |                    |                    |                    |                    | #2 and 4 | 0.939 | 0.761-1.159 | 0.560 |
|        |                    |                    |                    |                    | #3 and 4 | 0.901 | 0.731-1.110 | 0.327 |
|        |                    |                    |                    |                    | #1 and 2 | 0.993 | 0.832-1.186 | 0.938 |
|        |                    |                    |                    |                    | #1 and 3 | 1.032 | 0.871-1.224 | 0.712 |
| H19a15 | 49.10(48.01,50.58) | 49.28(48.22,50.61) | 49.68(47.9,51.2)   | 48.30(48.02,48.72) | #1 and 4 | 0.899 | 0.722-1.121 | 0.345 |
|        |                    |                    |                    |                    | #2 and 3 | 1.040 | 0.861-1.256 | 0.686 |
|        |                    |                    |                    |                    | #2 and 4 | 0.906 | 0.716-1.146 | 0.410 |
|        |                    |                    |                    |                    | #3 and 4 | 0.871 | 0.691-1.097 | 0.242 |
|        |                    |                    |                    |                    | #1 and 2 | 1.033 | 0.868-1.229 | 0.715 |
|        |                    |                    |                    |                    | #1 and 3 | 1.022 | 0.863-1.211 | 0.798 |
| H19a16 | 48.78(48.00,51.03) | 49.39(48.21,51.13) | 50.06(47.65,51.26) | 48.34(47.97,48.93) | #1 and 4 | 0.911 | 0.737-1.126 | 0.387 |
|        |                    |                    |                    |                    | #2 and 3 | 0.990 | 0.820-1.194 | 0.914 |
|        |                    |                    |                    |                    | #2 and 4 | 0.882 | 0.701-1.109 | 0.282 |
|        |                    |                    |                    |                    | #3 and 4 | 0.891 | 0.712-1.114 | 0.311 |

|       |                    |                    |                    |                    |          |       |             |       |
|-------|--------------------|--------------------|--------------------|--------------------|----------|-------|-------------|-------|
| H19b1 | 85.59(49.37,88.87) | 85.78(49.36,89.16) | 50.53(45.08,89.56) | 49.51(46.09,87.77) | #1 and 2 | 1.001 | 0.984-1.018 | 0.948 |
|       |                    |                    |                    |                    | #1 and 3 | 0.989 | 0.974-1.005 | 0.191 |
|       |                    |                    |                    |                    | #1 and 4 | 0.986 | 0.966-1.005 | 0.152 |
|       |                    |                    |                    |                    | #2 and 3 | 0.989 | 0.973-1.005 | 0.186 |
|       |                    |                    |                    |                    | #2 and 4 | 0.985 | 0.965-1.005 | 0.150 |
|       |                    |                    |                    |                    | #3 and 4 | 0.996 | 0.977-1.016 | 0.690 |
| H19b2 | 97.44(96.88,97.67) | 97.34(97.02,97.92) | 97.54(96.99,97.87) | 97.32(96.97,97.88) | #1 and 2 | 0.933 | 0.467-1.866 | 0.845 |
|       |                    |                    |                    |                    | #1 and 3 | 1.421 | 0.713-2.832 | 0.318 |
|       |                    |                    |                    |                    | #1 and 4 | 0.882 | 0.356-2.189 | 0.787 |
|       |                    |                    |                    |                    | #2 and 3 | 1.523 | 0.734-3.160 | 0.259 |
|       |                    |                    |                    |                    | #2 and 4 | 0.945 | 0.366-2.439 | 0.907 |
|       |                    |                    |                    |                    | #3 and 4 | 0.621 | 0.242-1.591 | 0.321 |
| H19b3 | 96.35(95.82,96.89) | 96.07(95.77,96.51) | 96.29(95.83,96.84) | 96.64(95.99,97.23) | #1 and 2 | 0.589 | 0.314-1.106 | 0.099 |
|       |                    |                    |                    |                    | #1 and 3 | 0.819 | 0.449-1.492 | 0.514 |
|       |                    |                    |                    |                    | #1 and 4 | 1.497 | 0.664-3.373 | 0.330 |
|       |                    |                    |                    |                    | #2 and 3 | 1.390 | 0.722-2.679 | 0.325 |
|       |                    |                    |                    |                    | #2 and 4 | 2.542 | 1.061-6.089 | 0.036 |
|       |                    |                    |                    |                    | #3 and 4 | 1.828 | 0.788-4.242 | 0.160 |
| H19b4 | 88.95(87.28,90.37) | 89.06(88.41,90.68) | 89.21(88.26,90.08) | 89.32(87.89,91.09) | #1 and 2 | 1.085 | 0.919-1.282 | 0.334 |
|       |                    |                    |                    |                    | #1 and 3 | 1.054 | 0.936-1.187 | 0.386 |
|       |                    |                    |                    |                    | #1 and 4 | 0.989 | 0.920-1.064 | 0.773 |
|       |                    |                    |                    |                    | #2 and 3 | 0.971 | 0.810-1.164 | 0.751 |
|       |                    |                    |                    |                    | #2 and 4 | 0.911 | 0.767-1.084 | 0.294 |
|       |                    |                    |                    |                    | #3 and 4 | 0.939 | 0.827-1.065 | 0.326 |
| H19b5 | 93.62(92.94,94.39) | 93.72(92.84,94.29) | 93.75(92.53,94.31) | 93.83(92.77,94.20) | #1 and 2 | 0.945 | 0.639-1.397 | 0.775 |
|       |                    |                    |                    |                    | #1 and 3 | 0.874 | 0.594-1.285 | 0.493 |

|       |                    |                    |                    |                    |          |       |             |              |
|-------|--------------------|--------------------|--------------------|--------------------|----------|-------|-------------|--------------|
|       |                    |                    |                    |                    | #1 and 4 | 0.916 | 0.550-1.525 | 0.736        |
|       |                    |                    |                    |                    | #2 and 3 | 0.925 | 0.610-1.403 | 0.714        |
|       |                    |                    |                    |                    | #2 and 4 | 0.970 | 0.566-1.661 | 0.910        |
|       |                    |                    |                    |                    | #3 and 4 | 1.048 | 0.616-1.782 | 0.862        |
|       |                    |                    |                    |                    | #1 and 2 | 1.224 | 0.515-2.911 | 0.647        |
|       |                    |                    |                    |                    | #1 and 3 | 0.858 | 0.378-1.952 | 0.716        |
| H19b6 | 97.97(97.64,98.36) | 98.02(97.73,98.30) | 97.95(97.58,98.22) | 97.9(97.55,98.33)  | #1 and 4 | 0.792 | 0.272-2.303 | 0.668        |
|       |                    |                    |                    |                    | #2 and 3 | 0.701 | 0.285-1.726 | 0.440        |
|       |                    |                    |                    |                    | #2 and 4 | 0.647 | 0.206-2.030 | 0.455        |
|       |                    |                    |                    |                    | #3 and 4 | 0.922 | 0.306-2.782 | 0.886        |
|       |                    |                    |                    |                    | #1 and 2 | 0.813 | 0.591-1.119 | 0.204        |
|       |                    |                    |                    |                    | #1 and 3 | 1.110 | 0.819-1.506 | 0.502        |
| H19b7 | 92.37(91.28,93.19) | 92.19(90.77,92.75) | 92.65(91.68,93.39) | 93.16(91.42,93.86) | #1 and 4 | 1.146 | 0.770-1.705 | 0.503        |
|       |                    |                    |                    |                    | #2 and 3 | 1.365 | 0.973-1.914 | 0.071        |
|       |                    |                    |                    |                    | #2 and 4 | 1.409 | 0.918-2.162 | 0.117        |
|       |                    |                    |                    |                    | #3 and 4 | 1.032 | 0.688-1.549 | 0.879        |
|       |                    |                    |                    |                    | #1 and 2 | 0.778 | 0.481-1.257 | 0.305        |
|       |                    |                    |                    |                    | #1 and 3 | 0.787 | 0.484-1.278 | 0.333        |
| H19b8 | 96.29(95.74,96.82) | 96.19(95.67,96.69) | 96.11(95.67,96.62) | 96.43(96.08,96.63) | #1 and 4 | 1.237 | 0.575-2.661 | 0.586        |
|       |                    |                    |                    |                    | #2 and 3 | 1.012 | 0.664-1.542 | 0.956        |
|       |                    |                    |                    |                    | #2 and 4 | 1.591 | 0.735-3.442 | 0.238        |
|       |                    |                    |                    |                    | #3 and 4 | 1.572 | 0.728-3.397 | 0.250        |
|       |                    |                    |                    |                    | #1 and 2 | 0.999 | 0.732-1.364 | 0.996        |
| H19b9 | 94.47(93.55,95.18) | 94.59(93.42,95.67) | 94.83(94.14,95.86) | 94.84(94.40,95.62) | #1 and 3 | 1.298 | 0.942-1.788 | 0.110        |
|       |                    |                    |                    |                    | #1 and 4 | 1.540 | 1.009-2.350 | <b>0.045</b> |
|       |                    |                    |                    |                    | #2 and 3 | 1.299 | 0.929-1.817 | 0.126        |



|        |                    |                    |                    |                    |          |       |             |              |
|--------|--------------------|--------------------|--------------------|--------------------|----------|-------|-------------|--------------|
|        |                    |                    |                    |                    | #2 and 4 | 1.541 | 0.995-2.387 | 0.053        |
|        |                    |                    |                    |                    | #3 and 4 | 1.186 | 0.783-1.797 | 0.421        |
|        |                    |                    |                    |                    | #1 and 2 | 1.032 | 0.528-2.019 | 0.926        |
|        |                    |                    |                    |                    | #1 and 3 | 0.776 | 0.408-1.474 | 0.438        |
|        |                    |                    |                    |                    | #1 and 4 | 0.386 | 0.169-0.884 | <b>0.024</b> |
| H19b10 | 97.42(96.99,97.75) | 97.45(97.13,97.85) | 97.34(96.94,97.75) | 97.17(96.52,97.79) | #2 and 3 | 0.751 | 0.379-1.490 | 0.413        |
|        |                    |                    |                    |                    | #2 and 4 | 0.374 | 0.157-0.892 | <b>0.027</b> |
|        |                    |                    |                    |                    | #3 and 4 | 0.498 | 0.218-1.138 | 0.098        |
|        |                    |                    |                    |                    | #1 and 2 | 1.047 | 0.808-1.357 | 0.729        |
|        |                    |                    |                    |                    | #1 and 3 | 1.210 | 0.913-1.604 | 0.184        |
| H19b11 | 90.55(89.62,91.32) | 90.81(89.42,91.50) | 90.82(89.77,91.75) | 90.64(90.21,91.41) | #1 and 4 | 1.219 | 0.839-1.770 | 0.298        |
|        |                    |                    |                    |                    | #2 and 3 | 1.156 | 0.866-1.543 | 0.324        |
|        |                    |                    |                    |                    | #2 and 4 | 1.164 | 0.794-1.707 | 0.436        |
|        |                    |                    |                    |                    | #3 and 4 | 1.007 | 0.681-1.490 | 0.972        |
|        |                    |                    |                    |                    | #1 and 2 | 1.225 | 0.658-2.281 | 0.523        |
|        |                    |                    |                    |                    | #1 and 3 | 1.310 | 0.717-2.391 | 0.380        |
| H19b12 | 96.99(96.50,97.40) | 97.15(96.77,97.44) | 97.14(96.71,97.61) | 97.15(96.7,97.48)  | #1 and 4 | 1.611 | 0.713-3.638 | 0.252        |
|        |                    |                    |                    |                    | #2 and 3 | 1.069 | 0.558-2.049 | 0.840        |
|        |                    |                    |                    |                    | #2 and 4 | 1.315 | 0.560-3.090 | 0.530        |
|        |                    |                    |                    |                    | #3 and 4 | 1.230 | 0.534-2.831 | 0.627        |
|        |                    |                    |                    |                    | #1 and 2 | 1.093 | 0.591-2.021 | 0.776        |
|        |                    |                    |                    |                    | #1 and 3 | 0.933 | 0.514-1.695 | 0.820        |
| H19b13 | 96.89(96.25,97.24) | 96.69(96.32,96.97) | 96.53(96.05,97.22) | 96.91(96.29,97.19) | #1 and 4 | 1.125 | 0.515-2.454 | 0.768        |
|        |                    |                    |                    |                    | #2 and 3 | 0.854 | 0.458-1.591 | 0.618        |
|        |                    |                    |                    |                    | #2 and 4 | 1.029 | 0.460-2.303 | 0.945        |
|        |                    |                    |                    |                    | #3 and 4 | 1.205 | 0.546-2.659 | 0.644        |

|        |                    |                    |                    |                    |          |       |              |              |
|--------|--------------------|--------------------|--------------------|--------------------|----------|-------|--------------|--------------|
| H19b14 | 95.21(94.73,95.92) | 95.11(94.04,95.92) | 95.71(94.93,96.19) | 95.56(95.00,95.78) | #1 and 2 | 0.821 | 0.566-1.192  | 0.300        |
|        |                    |                    |                    |                    | #1 and 3 | 1.052 | 0.718-1.541  | 0.796        |
|        |                    |                    |                    |                    | #1 and 4 | 1.047 | 0.637-1.723  | 0.855        |
|        |                    |                    |                    |                    | #2 and 3 | 1.281 | 0.856-1.916  | 0.229        |
|        |                    |                    |                    |                    | #2 and 4 | 1.275 | 0.761-2.138  | 0.356        |
|        |                    |                    |                    |                    | #3 and 4 | 0.996 | 0.592-1.675  | 0.988        |
|        |                    |                    |                    |                    | #1 and 2 | 1.124 | 0.492-2.566  | 0.782        |
| H19b15 | 97.76(97.17,98.19) | 97.75(97.37,98.10) | 97.40(96.99,97.75) | 97.90(97.78,98.01) | #1 and 3 | 0.353 | 0.158-0.788  | <b>0.011</b> |
|        |                    |                    |                    |                    | #1 and 4 | 2.138 | 0.702-6.515  | 0.181        |
|        |                    |                    |                    |                    | #2 and 3 | 0.314 | 0.131-0.750  | <b>0.009</b> |
|        |                    |                    |                    |                    | #2 and 4 | 1.903 | 0.592-6.122  | 0.280        |
|        |                    |                    |                    |                    | #3 and 4 | 6.060 | 1.855-19.799 | <b>0.003</b> |
|        |                    |                    |                    |                    | #1 and 2 | 0.787 | 0.589-1.052  | 0.106        |
|        |                    |                    |                    |                    | #1 and 3 | 0.909 | 0.686-1.204  | 0.505        |
| H19c1  | 93.96(92.48,95.12) | 93.46(92.88,94.03) | 93.84(92.85,94.66) | 93.86(92.92,94.40) | #1 and 4 | 0.880 | 0.613-1.263  | 0.487        |
|        |                    |                    |                    |                    | #2 and 3 | 1.155 | 0.862-1.547  | 0.334        |
|        |                    |                    |                    |                    | #2 and 4 | 1.118 | 0.770-1.624  | 0.559        |
|        |                    |                    |                    |                    | #3 and 4 | 0.968 | 0.670-1.399  | 0.862        |
|        |                    |                    |                    |                    | #1 and 2 | 1.028 | 0.878-1.203  | 0.735        |
|        |                    |                    |                    |                    | #1 and 3 | 1.040 | 0.893-1.212  | 0.615        |
|        |                    |                    |                    |                    | #1 and 4 | 1.081 | 0.886-1.320  | 0.443        |
| H19c2  | 86.82(84.3,88.46)  | 86.63(85.22,88.78) | 86.90(84.75,88.91) | 86.48(85.56,89.02) | #2 and 3 | 1.012 | 0.860-1.191  | 0.885        |
|        |                    |                    |                    |                    | #2 and 4 | 1.052 | 0.854-1.297  | 0.633        |
|        |                    |                    |                    |                    | #3 and 4 | 1.040 | 0.847-1.276  | 0.710        |
|        |                    |                    |                    |                    | #1 and 2 | 0.737 | 0.528-1.029  | 0.073        |
| H19c3  | 96.03(95.27,96.70) | 95.52(94.74,96.30) | 95.92(94.61,96.56) | 95.76(94.73,96.88) | #1 and 3 | 0.853 | 0.619-1.176  | 0.332        |

|       |                    |                    |                    |                    |          |       |             |       |
|-------|--------------------|--------------------|--------------------|--------------------|----------|-------|-------------|-------|
|       |                    |                    |                    |                    | #1 and 4 | 0.862 | 0.568-1.306 | 0.483 |
|       |                    |                    |                    |                    | #2 and 3 | 1.157 | 0.827-1.619 | 0.396 |
|       |                    |                    |                    |                    | #2 and 4 | 1.168 | 0.758-1.801 | 0.480 |
|       |                    |                    |                    |                    | #3 and 4 | 1.010 | 0.661-1.543 | 0.963 |
|       |                    |                    |                    |                    | #1 and 2 | 0.824 | 0.595-1.141 | 0.243 |
|       |                    |                    |                    |                    | #1 and 3 | 0.800 | 0.580-1.103 | 0.173 |
| H19c4 | 95.93(94.65,96.62) | 95.50(94.91,96.15) | 95.41(94.28,95.96) | 95.19(94.89,96.41) | #1 and 4 | 0.875 | 0.581-1.319 | 0.525 |
|       |                    |                    |                    |                    | #2 and 3 | 0.971 | 0.703-1.341 | 0.858 |
|       |                    |                    |                    |                    | #2 and 4 | 1.063 | 0.702-1.609 | 0.774 |
|       |                    |                    |                    |                    | #3 and 4 | 1.094 | 0.728-1.645 | 0.664 |
|       |                    |                    |                    |                    | #1 and 2 | 1.091 | 0.733-1.625 | 0.667 |
|       |                    |                    |                    |                    | #1 and 3 | 1.130 | 0.762-1.676 | 0.542 |
| H19c5 | 96.13(95.31,96.76) | 96.42(95.73,96.97) | 96.39(95.8,97.02)  | 96.39(95.29,97.03) | #1 and 4 | 1.086 | 0.642-1.838 | 0.758 |
|       |                    |                    |                    |                    | #2 and 3 | 1.036 | 0.691-1.553 | 0.865 |
|       |                    |                    |                    |                    | #2 and 4 | 0.995 | 0.579-1.710 | 0.987 |
|       |                    |                    |                    |                    | #3 and 4 | 0.961 | 0.563-1.642 | 0.884 |
|       |                    |                    |                    |                    | #1 and 2 | 0.798 | 0.547-1.165 | 0.243 |
|       |                    |                    |                    |                    | #1 and 3 | 0.880 | 0.602-1.285 | 0.507 |
| H19c6 | 97.32(96.56,97.75) | 96.76(96.42,97.50) | 96.98(96.09,97.69) | 96.87(95.93,97.54) | #1 and 4 | 0.884 | 0.541-1.445 | 0.623 |
|       |                    |                    |                    |                    | #2 and 3 | 1.102 | 0.759-1.599 | 0.609 |
|       |                    |                    |                    |                    | #2 and 4 | 1.108 | 0.681-1.802 | 0.681 |
|       |                    |                    |                    |                    | #3 and 4 | 1.005 | 0.616-1.640 | 0.984 |
|       |                    |                    |                    |                    | #1 and 2 | 0.957 | 0.591-1.550 | 0.858 |
| H19c7 | 98.06(97.37,98.37) | 97.89(97.43,98.35) | 97.81(97.32,98.41) | 98.04(97.31,98.41) | #1 and 3 | 0.874 | 0.551-1.387 | 0.568 |
|       |                    |                    |                    |                    | #1 and 4 | 1.114 | 0.586-2.118 | 0.741 |
|       |                    |                    |                    |                    | #2 and 3 | 0.914 | 0.565-1.477 | 0.713 |

|        |                    |                    |                    |                    |          |       |             |       |
|--------|--------------------|--------------------|--------------------|--------------------|----------|-------|-------------|-------|
|        |                    |                    |                    |                    | #2 and 4 | 1.164 | 0.600-2.259 | 0.653 |
|        |                    |                    |                    |                    | #3 and 4 | 1.274 | 0.667-2.435 | 0.463 |
|        |                    |                    |                    |                    | #1 and 2 | 1.010 | 0.745-1.371 | 0.947 |
|        |                    |                    |                    |                    | #1 and 3 | 1.157 | 0.832-1.608 | 0.386 |
|        |                    |                    |                    |                    | #1 and 4 | 1.075 | 0.717-1.613 | 0.725 |
| H19c8  | 97.14(96.47,97.69) | 96.93(96.5,97.61)  | 97.02(96.46,97.94) | 96.90(96.46,97.50) | #2 and 3 | 1.145 | 0.807-1.625 | 0.449 |
|        |                    |                    |                    |                    | #2 and 4 | 1.064 | 0.693-1.634 | 0.776 |
|        |                    |                    |                    |                    | #3 and 4 | 0.930 | 0.599-1.443 | 0.745 |
|        |                    |                    |                    |                    | #1 and 2 | 0.980 | 0.873-1.101 | 0.738 |
|        |                    |                    |                    |                    | #1 and 3 | 0.963 | 0.874-1.061 | 0.443 |
|        |                    |                    |                    |                    | #1 and 4 | 0.942 | 0.856-1.038 | 0.230 |
| H19c9  | 93.50(92.43,94.00) | 93.57(92.19,94.2)  | 93.96(92.71,94.88) | 93.70(92.86,94.28) | #2 and 3 | 0.982 | 0.892-1.081 | 0.713 |
|        |                    |                    |                    |                    | #2 and 4 | 0.961 | 0.873-1.058 | 0.421 |
|        |                    |                    |                    |                    | #3 and 4 | 0.979 | 0.917-1.045 | 0.521 |
|        |                    |                    |                    |                    | #1 and 2 | 0.874 | 0.596-1.282 | 0.490 |
|        |                    |                    |                    |                    | #1 and 3 | 1.091 | 0.735-1.621 | 0.665 |
|        |                    |                    |                    |                    | #1 and 4 | 0.921 | 0.555-1.529 | 0.749 |
| H19c10 | 96.88(96.13,97.62) | 96.76(96.06,97.22) | 96.81(96.35,97.48) | 96.67(96.17,97.29) | #2 and 3 | 1.249 | 0.830-1.879 | 0.286 |
|        |                    |                    |                    |                    | #2 and 4 | 1.054 | 0.628-1.767 | 0.843 |
|        |                    |                    |                    |                    | #3 and 4 | 0.844 | 0.498-1.430 | 0.528 |
|        |                    |                    |                    |                    | #1 and 2 | 1.037 | 0.856-1.256 | 0.713 |
|        |                    |                    |                    |                    | #1 and 3 | 0.950 | 0.790-1.143 | 0.588 |
|        |                    |                    |                    |                    | #1 and 4 | 0.986 | 0.773-1.259 | 0.912 |
| H19c11 | 89.84(87.88,91.28) | 89.64(88.07,91.46) | 89.31(87.43,91.01) | 89.21(87.43,91.20) | #2 and 3 | 0.917 | 0.757-1.110 | 0.374 |
|        |                    |                    |                    |                    | #2 and 4 | 0.951 | 0.739-1.225 | 0.699 |
|        |                    |                    |                    |                    | #3 and 4 | 1.038 | 0.812-1.327 | 0.767 |

|        |                    |                    |                    |                    |          |       |             |              |
|--------|--------------------|--------------------|--------------------|--------------------|----------|-------|-------------|--------------|
|        |                    |                    |                    |                    | #1 and 2 | 0.870 | 0.555-1.364 | 0.545        |
|        |                    |                    |                    |                    | #1 and 3 | 1.097 | 0.678-1.773 | 0.706        |
| H19c12 | 97.48(97.13,97.98) | 97.49(96.84,98.04) | 97.39(97.02,98.05) | 97.70(97.44,98.16) | #1 and 4 | 1.466 | 0.727-2.957 | 0.286        |
|        |                    |                    |                    |                    | #2 and 3 | 1.260 | 0.766-2.075 | 0.363        |
|        |                    |                    |                    |                    | #2 and 4 | 1.684 | 0.818-3.469 | 0.157        |
|        |                    |                    |                    |                    | #3 and 4 | 1.336 | 0.649-2.750 | 0.431        |
|        |                    |                    |                    |                    | #1 and 2 | 0.804 | 0.454-1.426 | 0.456        |
|        |                    |                    |                    |                    | #1 and 3 | 0.548 | 0.313-0.959 | <b>0.035</b> |
| H19c13 | 98.15(97.60,98.63) | 97.94(97.66,98.34) | 97.84(97.03,98.62) | 98.01(97.72,98.77) | #1 and 4 | 1.015 | 0.482-2.137 | 0.970        |
|        |                    |                    |                    |                    | #2 and 3 | 0.681 | 0.387-1.198 | 0.183        |
|        |                    |                    |                    |                    | #2 and 4 | 1.261 | 0.586-2.716 | 0.553        |
|        |                    |                    |                    |                    | #3 and 4 | 1.851 | 0.871-3.937 | 0.110        |
|        |                    |                    |                    |                    | #1 and 2 | 1.127 | 0.691-1.839 | 0.632        |
|        |                    |                    |                    |                    | #1 and 3 | 1.204 | 0.737-1.967 | 0.459        |
| H19c14 | 98.38(97.96,98.78) | 98.42(98.01,98.82) | 98.4(98.03,98.81)  | 98.57(98.12,98.85) | #1 and 4 | 1.671 | 0.741-3.768 | 0.216        |
|        |                    |                    |                    |                    | #2 and 3 | 1.068 | 0.623-1.830 | 0.811        |
|        |                    |                    |                    |                    | #2 and 4 | 1.483 | 0.643-3.419 | 0.355        |
|        |                    |                    |                    |                    | #3 and 4 | 1.388 | 0.606-3.181 | 0.438        |
|        |                    |                    |                    |                    | #1 and 2 | 0.797 | 0.430-1.478 | 0.472        |
|        |                    |                    |                    |                    | #1 and 3 | 1.393 | 0.744-2.608 | 0.301        |
| H19c15 | 98.17(97.69,98.53) | 98.07(97.70,98.41) | 98.26(97.82,98.52) | 98.14(97.81,98.81) | #1 and 4 | 1.302 | 0.568-2.986 | 0.533        |
|        |                    |                    |                    |                    | #2 and 3 | 1.747 | 0.889-3.431 | 0.105        |
|        |                    |                    |                    |                    | #2 and 4 | 1.633 | 0.684-3.896 | 0.269        |
|        |                    |                    |                    |                    | #3 and 4 | 0.935 | 0.395-2.210 | 0.878        |
| H19c16 | 97.65(97.00,98.02) | 97.8(97.29,98.05)  | 97.64(97.06,97.93) | 97.43(97.10,98.26) | #1 and 2 | 1.226 | 0.764-1.966 | 0.399        |
|        |                    |                    |                    |                    | #1 and 3 | 0.988 | 0.629-1.551 | 0.957        |

|        |                    |                    |                    |                    |          |       |             |              |
|--------|--------------------|--------------------|--------------------|--------------------|----------|-------|-------------|--------------|
|        |                    |                    |                    |                    | #1 and 4 | 1.174 | 0.623-2.211 | 0.620        |
|        |                    |                    |                    |                    | #2 and 3 | 0.806 | 0.491-1.322 | 0.393        |
|        |                    |                    |                    |                    | #2 and 4 | 0.958 | 0.493-1.860 | 0.898        |
|        |                    |                    |                    |                    | #3 and 4 | 1.188 | 0.620-2.279 | 0.603        |
|        |                    |                    |                    |                    | #1 and 2 | 0.767 | 0.447-1.316 | 0.335        |
|        |                    |                    |                    |                    | #1 and 3 | 1.152 | 0.671-1.977 | 0.607        |
| H19c17 | 97.69(97.34,98.14) | 97.51(96.9,97.98)  | 97.85(97.55,98.23) | 97.55(96.92,97.87) | #1 and 4 | 0.491 | 0.255-0.946 | <b>0.033</b> |
|        |                    |                    |                    |                    | #2 and 3 | 1.503 | 0.857-2.635 | 0.155        |
|        |                    |                    |                    |                    | #2 and 4 | 0.641 | 0.347-1.183 | 0.155        |
|        |                    |                    |                    |                    | #3 and 4 | 0.426 | 0.216-0.841 | <b>0.014</b> |
|        |                    |                    |                    |                    | #1 and 2 | 1.046 | 0.753-1.452 | 0.790        |
|        |                    |                    |                    |                    | #1 and 3 | 1.291 | 0.920-1.810 | 0.139        |
| H19c18 | 95.05(94.07,95.65) | 94.78(93.77,95.67) | 95.29(94.37,95.93) | 94.99(94.08,95.63) | #1 and 4 | 1.130 | 0.729-1.749 | 0.585        |
|        |                    |                    |                    |                    | #2 and 3 | 1.234 | 0.868-1.755 | 0.241        |
|        |                    |                    |                    |                    | #2 and 4 | 1.080 | 0.685-1.703 | 0.740        |
|        |                    |                    |                    |                    | #3 and 4 | 0.875 | 0.555-1.380 | 0.566        |
|        |                    |                    |                    |                    | #1 and 2 | 1.050 | 0.637-1.730 | 0.848        |
|        |                    |                    |                    |                    | #1 and 3 | 1.102 | 0.674-1.803 | 0.698        |
| H19c19 | 97.26(96.74,97.55) | 97.16(96.67,97.83) | 97.12(96.61,97.62) | 97.09(96.29,97.53) | #1 and 4 | 0.850 | 0.441-1.637 | 0.627        |
|        |                    |                    |                    |                    | #2 and 3 | 1.050 | 0.631-1.745 | 0.851        |
|        |                    |                    |                    |                    | #2 and 4 | 0.809 | 0.411-1.596 | 0.542        |
|        |                    |                    |                    |                    | #3 and 4 | 0.771 | 0.395-1.505 | 0.446        |
|        |                    |                    |                    |                    | #1 and 2 | 0.955 | 0.901-1.011 | 0.112        |
| H19d1  | 54.83(50.00,59.39) | 52.6(46.04,56.86)  | 51.16(47.47,56.32) | 52.67(47.89,56.81) | #1 and 3 | 0.957 | 0.907-1.011 | 0.119        |
|        |                    |                    |                    |                    | #1 and 4 | 0.986 | 0.919-1.058 | 0.701        |
|        |                    |                    |                    |                    | #2 and 3 | 1.003 | 0.950-1.059 | 0.914        |

|       |                    |                    |                    |                    |          |       |             |       |
|-------|--------------------|--------------------|--------------------|--------------------|----------|-------|-------------|-------|
|       |                    |                    |                    |                    | #2 and 4 | 1.033 | 0.961-1.111 | 0.379 |
|       |                    |                    |                    |                    | #3 and 4 | 1.030 | 0.960-1.105 | 0.409 |
|       |                    |                    |                    |                    | #1 and 2 | 0.986 | 0.934-1.041 | 0.610 |
|       |                    |                    |                    |                    | #1 and 3 | 0.974 | 0.924-1.027 | 0.324 |
|       |                    |                    |                    |                    | #1 and 4 | 1.000 | 0.928-1.078 | 0.996 |
| H19d2 | 52.52(49.13,57.53) | 52.31(47.06,57.19) | 52.34(48.26,56.46) | 52.59(47.76,57.62) | #2 and 3 | 0.988 | 0.938-1.039 | 0.631 |
|       |                    |                    |                    |                    | #2 and 4 | 1.014 | 0.940-1.095 | 0.714 |
|       |                    |                    |                    |                    | #3 and 4 | 1.027 | 0.953-1.108 | 0.484 |
|       |                    |                    |                    |                    | #1 and 2 | 0.965 | 0.907-1.027 | 0.261 |
|       |                    |                    |                    |                    | #1 and 3 | 0.996 | 0.937-1.059 | 0.901 |
|       |                    |                    |                    |                    | #1 and 4 | 1.004 | 0.927-1.089 | 0.916 |
| H19d3 | 53.00(49.5,57.68)  | 52.08(48.45,56.06) | 53.00(49.39,56.71) | 53.00(48.64,58.08) | #2 and 3 | 1.032 | 0.970-1.098 | 0.317 |
|       |                    |                    |                    |                    | #2 and 4 | 1.041 | 0.958-1.131 | 0.348 |
|       |                    |                    |                    |                    | #3 and 4 | 1.008 | 0.929-1.094 | 0.845 |
|       |                    |                    |                    |                    | #1 and 2 | 0.976 | 0.921-1.035 | 0.418 |
|       |                    |                    |                    |                    | #1 and 3 | 0.980 | 0.925-1.038 | 0.495 |
|       |                    |                    |                    |                    | #1 and 4 | 0.988 | 0.915-1.068 | 0.768 |
| H19d4 | 52.44(49.76,57.54) | 52.2(48.78,55.05)  | 52.69(49.1,55.82)  | 52.38(48.02,57.84) | #2 and 3 | 1.004 | 0.947-1.064 | 0.889 |
|       |                    |                    |                    |                    | #2 and 4 | 1.013 | 0.936-1.096 | 0.755 |
|       |                    |                    |                    |                    | #3 and 4 | 1.008 | 0.933-1.090 | 0.832 |
|       |                    |                    |                    |                    | #1 and 2 | 0.966 | 0.909-1.027 | 0.272 |
|       |                    |                    |                    |                    | #1 and 3 | 0.964 | 0.908-1.024 | 0.231 |
|       |                    |                    |                    |                    | #1 and 4 | 1.008 | 0.929-1.094 | 0.843 |
| H19d5 | 53.92(50.56,58.73) | 53.51(49.71,56.54) | 53.72(47.81,57.50) | 54.55(49.75,59.67) | #2 and 3 | 0.998 | 0.941-1.057 | 0.934 |
|       |                    |                    |                    |                    | #2 and 4 | 1.043 | 0.959-1.135 | 0.324 |
|       |                    |                    |                    |                    | #3 and 4 | 1.046 | 0.962-1.137 | 0.290 |

|        |                    |                    |                    |                    |          |       |             |              |
|--------|--------------------|--------------------|--------------------|--------------------|----------|-------|-------------|--------------|
|        |                    |                    |                    |                    | #1 and 2 | 1.036 | 0.966-1.111 | 0.327        |
|        |                    |                    |                    |                    | #1 and 3 | 1.080 | 1.004-1.162 | <b>0.038</b> |
| H19d6  | 82.59(77.83,86.17) | 82.76(77.31,88.09) | 84.62(80.22,88.56) | 81.11(77.03,85.47) | #1 and 4 | 1.013 | 0.925-1.109 | 0.786        |
|        |                    |                    |                    |                    | #2 and 3 | 1.043 | 0.968-1.124 | 0.270        |
|        |                    |                    |                    |                    | #2 and 4 | 0.978 | 0.890-1.075 | 0.643        |
|        |                    |                    |                    |                    | #3 and 4 | 0.937 | 0.852-1.031 | 0.183        |
|        |                    |                    |                    |                    | #1 and 2 | 0.982 | 0.934-1.033 | 0.475        |
|        |                    |                    |                    |                    | #1 and 3 | 1.019 | 0.967-1.074 | 0.480        |
| H19d7  | 73.55(69.16,80.03) | 71.52(68.24,75.28) | 76.74(69.26,80.2)  | 73.47(69.76,75.53) | #1 and 4 | 0.999 | 0.933-1.071 | 0.985        |
|        |                    |                    |                    |                    | #2 and 3 | 1.038 | 0.983-1.096 | 0.179        |
|        |                    |                    |                    |                    | #2 and 4 | 1.018 | 0.949-1.092 | 0.622        |
|        |                    |                    |                    |                    | #3 and 4 | 0.981 | 0.914-1.053 | 0.588        |
|        |                    |                    |                    |                    | #1 and 2 | 0.990 | 0.939-1.044 | 0.720        |
|        |                    |                    |                    |                    | #1 and 3 | 0.986 | 0.936-1.039 | 0.590        |
| H19d8  | 70.66(66.2,78.25)  | 68.82(64.88,75.95) | 70.66(64.38,76.40) | 70.66(68.73,73.48) | #1 and 4 | 0.992 | 0.926-1.064 | 0.829        |
|        |                    |                    |                    |                    | #2 and 3 | 0.995 | 0.944-1.050 | 0.865        |
|        |                    |                    |                    |                    | #2 and 4 | 1.002 | 0.933-1.076 | 0.955        |
|        |                    |                    |                    |                    | #3 and 4 | 1.007 | 0.938-1.080 | 0.853        |
|        |                    |                    |                    |                    | #1 and 2 | 1.014 | 0.956-1.076 | 0.644        |
|        |                    |                    |                    |                    | #1 and 3 | 1.049 | 0.990-1.112 | 0.106        |
| H19d9  | 75.43(70.72,81.98) | 76.19(73.1,80.60)  | 77.78(70.78,85.62) | 77.27(71.29,82.18) | #1 and 4 | 1.036 | 0.961-1.116 | 0.362        |
|        |                    |                    |                    |                    | #2 and 3 | 1.035 | 0.976-1.098 | 0.256        |
|        |                    |                    |                    |                    | #2 and 4 | 1.021 | 0.946-1.102 | 0.590        |
|        |                    |                    |                    |                    | #3 and 4 | 0.987 | 0.916-1.063 | 0.729        |
| H19d10 | 62.05(56.89,66.38) | 61.66(54.70,66.26) | 62.2(55.75,67.68)  | 62.78(60.70,66.98) | #1 and 2 | 0.979 | 0.929-1.032 | 0.433        |
|        |                    |                    |                    |                    | #1 and 3 | 0.994 | 0.943-1.048 | 0.820        |



|          |                    |                    |                    |                    |          |       |             |       |
|----------|--------------------|--------------------|--------------------|--------------------|----------|-------|-------------|-------|
|          |                    |                    |                    |                    | #1 and 4 | 1.011 | 0.941-1.086 | 0.763 |
|          |                    |                    |                    |                    | #2 and 3 | 1.015 | 0.962-1.071 | 0.581 |
|          |                    |                    |                    |                    | #2 and 4 | 1.033 | 0.960-1.111 | 0.390 |
|          |                    |                    |                    |                    | #3 and 4 | 1.017 | 0.946-1.094 | 0.643 |
|          |                    |                    |                    |                    | #1 and 2 | 0.924 | 0.739-1.154 | 0.485 |
|          |                    |                    |                    |                    | #1 and 3 | 0.912 | 0.733-1.133 | 0.405 |
| MALAT1a1 | 33.33(32.34,34.49) | 32.89(31.55,35.02) | 33.25(31.71,34.71) | 32.64(31.40,33.40) | #1 and 4 | 0.808 | 0.605-1.080 | 0.149 |
|          |                    |                    |                    |                    | #2 and 3 | 0.987 | 0.792-1.230 | 0.908 |
|          |                    |                    |                    |                    | #2 and 4 | 0.875 | 0.652-1.173 | 0.372 |
|          |                    |                    |                    |                    | #3 and 4 | 0.886 | 0.664-1.183 | 0.413 |
|          |                    |                    |                    |                    | #1 and 2 | 0.867 | 0.693-1.086 | 0.215 |
|          |                    |                    |                    |                    | #1 and 3 | 0.974 | 0.784-1.211 | 0.813 |
| MALAT1a2 | 25.97(25,27.40)    | 25.89(24.59,27.30) | 26.13(24.92,27.54) | 26.91(25.58,28.17) | #1 and 4 | 1.183 | 0.884-1.584 | 0.259 |
|          |                    |                    |                    |                    | #2 and 3 | 1.123 | 0.893-1.412 | 0.322 |
|          |                    |                    |                    |                    | #2 and 4 | 1.364 | 1.001-1.858 | 0.049 |
|          |                    |                    |                    |                    | #3 and 4 | 1.214 | 0.900-1.639 | 0.204 |
|          |                    |                    |                    |                    | #1 and 2 | 0.918 | 0.724-1.164 | 0.481 |
|          |                    |                    |                    |                    | #1 and 3 | 0.888 | 0.705-1.118 | 0.311 |
| MALAT1a3 | 20.11(18.6,21.66)  | 19.82(18.88,20.92) | 20.21(18.34,21.19) | 20.4(19.66,21.88)  | #1 and 4 | 1.156 | 0.865-1.546 | 0.327 |
|          |                    |                    |                    |                    | #2 and 3 | 0.967 | 0.759-1.231 | 0.784 |
|          |                    |                    |                    |                    | #2 and 4 | 1.260 | 0.924-1.718 | 0.145 |
|          |                    |                    |                    |                    | #3 and 4 | 1.303 | 0.961-1.767 | 0.089 |
|          |                    |                    |                    |                    | #1 and 2 | 0.832 | 0.618-1.120 | 0.225 |
| MALAT1a4 | 12.58(11.67,13.76) | 12.28(11.26,13.24) | 12.08(11.32,13.24) | 12.35(11.61,13.49) | #1 and 3 | 0.789 | 0.588-1.057 | 0.113 |
|          |                    |                    |                    |                    | #1 and 4 | 0.980 | 0.668-1.437 | 0.916 |
|          |                    |                    |                    |                    | #2 and 3 | 0.948 | 0.701-1.282 | 0.728 |

|          |                    |                    |                    |                    |          |       |             |              |
|----------|--------------------|--------------------|--------------------|--------------------|----------|-------|-------------|--------------|
|          |                    |                    |                    |                    | #2 and 4 | 1.177 | 0.790-1.754 | 0.422        |
|          |                    |                    |                    |                    | #3 and 4 | 1.242 | 0.837-1.843 | 0.281        |
|          |                    |                    |                    |                    | #1 and 2 | 1.254 | 0.773-2.034 | 0.360        |
|          |                    |                    |                    |                    | #1 and 3 | 0.715 | 0.435-1.176 | 0.186        |
|          |                    |                    |                    |                    | #1 and 4 | 1.151 | 0.626-2.115 | 0.651        |
| MALAT1a5 | 4.94(4.48,5.54)    | 5.11(4.62,5.71)    | 4.67(4.14,5.37)    | 5.00(4.56,5.58)    | #2 and 3 | 0.571 | 0.335-0.972 | <b>0.039</b> |
|          |                    |                    |                    |                    | #2 and 4 | 0.918 | 0.486-1.734 | 0.792        |
|          |                    |                    |                    |                    | #3 and 4 | 1.609 | 0.840-3.081 | 0.151        |
|          |                    |                    |                    |                    | #1 and 2 | 0.978 | 0.759-1.259 | 0.862        |
|          |                    |                    |                    |                    | #1 and 3 | 0.748 | 0.579-0.967 | <b>0.026</b> |
|          |                    |                    |                    |                    | #1 and 4 | 1.228 | 0.898-1.680 | 0.198        |
| MALAT1a6 | 20.18(18.89,21.30) | 19.86(18.69,21.21) | 19.19(18.56,19.95) | 20.71(19.78,21.87) | #2 and 3 | 0.765 | 0.578-1.013 | 0.062        |
|          |                    |                    |                    |                    | #2 and 4 | 1.256 | 0.899-1.757 | 0.182        |
|          |                    |                    |                    |                    | #3 and 4 | 1.642 | 1.158-2.330 | <b>0.005</b> |
|          |                    |                    |                    |                    | #1 and 2 | 0.932 | 0.726-1.196 | 0.579        |
|          |                    |                    |                    |                    | #1 and 3 | 0.878 | 0.692-1.115 | 0.285        |
|          |                    |                    |                    |                    | #1 and 4 | 1.159 | 0.846-1.590 | 0.358        |
| MALAT1a7 | 26.01(24.73,26.86) | 25.68(24.63,26.76) | 25.43(24.45,26.46) | 26.31(24.88,27.38) | #2 and 3 | 0.942 | 0.726-1.222 | 0.653        |
|          |                    |                    |                    |                    | #2 and 4 | 1.244 | 0.887-1.745 | 0.205        |
|          |                    |                    |                    |                    | #3 and 4 | 1.321 | 0.949-1.838 | 0.099        |
|          |                    |                    |                    |                    | #1 and 2 | 0.999 | 0.778-1.282 | 0.991        |
|          |                    |                    |                    |                    | #1 and 3 | 1.035 | 0.813-1.317 | 0.783        |
|          |                    |                    |                    |                    | #1 and 4 | 1.358 | 0.994-1.856 | 0.055        |
| MALAT1a8 | 21.39(20.36,22.34) | 21.34(20.08,22.60) | 21.37(20.06,22.74) | 22.2(21.55,22.93)  | #2 and 3 | 1.036 | 0.798-1.344 | 0.790        |
|          |                    |                    |                    |                    | #2 and 4 | 1.360 | 0.984-1.880 | 0.063        |
|          |                    |                    |                    |                    | #3 and 4 | 1.313 | 0.959-1.798 | 0.090        |

|           |                    |                    |                    |                    |          |       |              |              |
|-----------|--------------------|--------------------|--------------------|--------------------|----------|-------|--------------|--------------|
|           |                    |                    |                    |                    | #1 and 2 | 0.840 | 0.655-1.077  | 0.170        |
|           |                    |                    |                    |                    | #1 and 3 | 0.983 | 0.774-1.247  | 0.887        |
| MALAT1a9  | 20.17(18.86,21.02) | 19.55(18.43,20.61) | 19.90(18.58,20.84) | 19.82(18.71,20.70) | #1 and 4 | 1.044 | 0.763-1.428  | 0.788        |
|           |                    |                    |                    |                    | #2 and 3 | 1.170 | 0.903-1.516  | 0.235        |
|           |                    |                    |                    |                    | #2 and 4 | 1.243 | 0.889-1.737  | 0.204        |
|           |                    |                    |                    |                    | #3 and 4 | 1.062 | 0.767-1.470  | 0.716        |
|           |                    |                    |                    |                    | #1 and 2 | 0.916 | 0.733-1.145  | 0.440        |
|           |                    |                    |                    |                    | #1 and 3 | 1.006 | 0.815-1.241  | 0.958        |
| MALAT1a10 | 26.49(24.92,27.70) | 26.45(25.06,27.30) | 26.33(25.39,27.74) | 27.72(26.17,29.23) | #1 and 4 | 1.239 | 0.952-1.612  | 0.111        |
|           |                    |                    |                    |                    | #2 and 3 | 1.239 | 0.952-1.612  | 0.111        |
|           |                    |                    |                    |                    | #2 and 4 | 1.353 | 1.023-1.788  | <b>0.034</b> |
|           |                    |                    |                    |                    | #3 and 4 | 1.232 | 0.947-1.602  | 0.120        |
|           |                    |                    |                    |                    | #1 and 2 | 1.040 | 0.231-4.678  | 0.959        |
|           |                    |                    |                    |                    | #1 and 3 | 1.896 | 0.455-7.897  | 0.379        |
| MALAT1b1  | 0.62(0.47,0.89)    | 0.62(0.41,0.77)    | 0.64(0.43,0.93)    | 0.71(0.58,0.84)    | #1 and 4 | 2.70  | 0.444-16.426 | 0.281        |
|           |                    |                    |                    |                    | #2 and 3 | 1.823 | 0.392-8.487  | 0.444        |
|           |                    |                    |                    |                    | #2 and 4 | 2.597 | 0.383-17.601 | 0.328        |
|           |                    |                    |                    |                    | #3 and 4 | 1.424 | 0.232-8.735  | 0.703        |
|           |                    |                    |                    |                    | #1 and 2 | 1.116 | 0.276-4.518  | 0.878        |
|           |                    |                    |                    |                    | #1 and 3 | 0.363 | 0.070-1.868  | 0.225        |
| MALAT1b2  | 0.52(0.38,0.74)    | 0.57(0.46,0.72)    | 0.48(0.37,0.65)    | 0.59(0.48,0.81)    | #1 and 4 | 2.444 | 0.530-11.277 | 0.252        |
|           |                    |                    |                    |                    | #2 and 3 | 0.325 | 0.059-1.798  | 0.198        |
|           |                    |                    |                    |                    | #2 and 4 | 2.190 | 0.419-11.438 | 0.353        |
|           |                    |                    |                    |                    | #3 and 4 | 6.736 | 0.999-45.428 | 0.050        |
| MALAT1b3  | 0.72(0.53,0.93)    | 0.8(0.70,0.92)     | 0.6(0.44,0.88)     | 0.73(0.47,0.82)    | #1 and 2 | 1.509 | 0.443-5.145  | 0.511        |
|           |                    |                    |                    |                    | #1 and 3 | 0.412 | 0.106-1.605  | 0.201        |

|          |                 |                 |                 |                 |          |       |              |       |
|----------|-----------------|-----------------|-----------------|-----------------|----------|-------|--------------|-------|
|          |                 |                 |                 |                 | #1 and 4 | 0.495 | 0.082-2.997  | 0.444 |
|          |                 |                 |                 |                 | #2 and 3 | 0.273 | 0.067-1.107  | 0.069 |
|          |                 |                 |                 |                 | #2 and 4 | 0.328 | 0.052-2.073  | 0.236 |
|          |                 |                 |                 |                 | #3 and 4 | 1.202 | 0.183-7.899  | 0.848 |
|          |                 |                 |                 |                 | #1 and 2 | 0.948 | 0.274-3.279  | 0.933 |
|          |                 |                 |                 |                 | #1 and 3 | 2.154 | 0.756-6.132  | 0.151 |
|          |                 |                 |                 |                 | #1 and 4 | 0.928 | 0.163-5.292  | 0.933 |
| MALAT1b4 | 0.65(0.46,0.92) | 0.67(0.49,0.89) | 0.76(0.50,0.97) | 0.69(0.45,0.81) | #2 and 3 | 2.272 | 0.721-7.163  | 0.161 |
|          |                 |                 |                 |                 | #2 and 4 | 0.979 | 0.161-5.959  | 0.982 |
|          |                 |                 |                 |                 | #3 and 4 | 0.431 | 0.079-2.364  | 0.332 |
|          |                 |                 |                 |                 | #1 and 2 | 1.071 | 0.210-5.471  | 0.935 |
|          |                 |                 |                 |                 | #1 and 3 | 1.888 | 0.394-9.049  | 0.427 |
|          |                 |                 |                 |                 | #1 and 4 | 3.166 | 0.427-23.493 | 0.260 |
| MALAT1b5 | 0.67(0.53,0.86) | 0.68(0.56,0.83) | 0.69(0.53,0.92) | 0.75(0.58,0.93) | #2 and 3 | 1.763 | 0.366-8.485  | 0.479 |
|          |                 |                 |                 |                 | #2 and 4 | 2.957 | 0.391-22.370 | 0.294 |
|          |                 |                 |                 |                 | #3 and 4 | 1.677 | 0.239-11.762 | 0.603 |
|          |                 |                 |                 |                 | #1 and 2 | 0.820 | 0.241-2.795  | 0.751 |
|          |                 |                 |                 |                 | #1 and 3 | 1.481 | 0.477-4.598  | 0.496 |
|          |                 |                 |                 |                 | #1 and 4 | 1.728 | 0.396-7.55)  | 0.467 |
| MALAT1b6 | 0.69(0.49,0.92) | 0.70(0.54,0.87) | 0.77(0.48,0.93) | 0.59(0.51,0.98) | #2 and 3 | 1.806 | 0.537-6.076  | 0.340 |
|          |                 |                 |                 |                 | #2 and 4 | 2.107 | 0.446-9.957  | 0.347 |
|          |                 |                 |                 |                 | #3 and 4 | 1.167 | 0.272-5.000  | 0.836 |
|          |                 |                 |                 |                 | #1 and 2 | 0.573 | 0.162-2.033  | 0.389 |
| MALAT1b7 | 0.74(0.55,0.94) | 0.72(0.55,0.88) | 0.75(0.55,0.94) | 0.69(0.62,0.77) | #1 and 3 | 0.775 | 0.259-2.318  | 0.649 |
|          |                 |                 |                 |                 | #1 and 4 | 0.458 | 0.080-2.610  | 0.379 |

|           |                 |                 |                 |                 |          |       |             |       |
|-----------|-----------------|-----------------|-----------------|-----------------|----------|-------|-------------|-------|
|           |                 |                 |                 |                 | #2 and 3 | 1.352 | 0.352-5.184 | 0.66  |
|           |                 |                 |                 |                 | #2 and 4 | 0.799 | 0.122-5.244 | 0.815 |
|           |                 |                 |                 |                 | #3 and 4 | 0.591 | 0.098-3.572 | 0.567 |
|           |                 |                 |                 |                 | #1 and 2 | 0.886 | 0.222-3.540 | 0.864 |
|           |                 |                 |                 |                 | #1 and 3 | 1.033 | 0.269-3.962 | 0.962 |
|           |                 |                 |                 |                 | #1 and 4 | 0.863 | 0.142-5.239 | 0.872 |
| MALAT1b8  | 0.79(0.57,1.03) | 0.75(0.61,0.93) | 0.82(0.61,1.06) | 0.86(0.60,1.02) | #2 and 3 | 1.166 | 0.273-4.981 | 0.836 |
|           |                 |                 |                 |                 | #2 and 4 | 0.974 | 0.146-6.509 | 0.978 |
|           |                 |                 |                 |                 | #3 and 4 | 0.835 | 0.130-5.371 | 0.850 |
|           |                 |                 |                 |                 | #1 and 2 | 0.829 | 0.225-3.054 | 0.778 |
|           |                 |                 |                 |                 | #1 and 3 | 0.883 | 0.244-3.193 | 0.850 |
|           |                 |                 |                 |                 | #1 and 4 | 1.071 | 0.195-5.894 | 0.937 |
| MALAT1b9  | 0.77(0.51,0.97) | 0.76(0.54,0.90) | 0.69(0.52,0.92) | 0.75(0.54,0.90) | #2 and 3 | 1.065 | 0.298-3.803 | 0.923 |
|           |                 |                 |                 |                 | #2 and 4 | 1.291 | 0.233-7.172 | 0.770 |
|           |                 |                 |                 |                 | #3 and 4 | 1.212 | 0.223-6.581 | 0.823 |
|           |                 |                 |                 |                 | #1 and 2 | 0.409 | 0.118-1.421 | 0.159 |
|           |                 |                 |                 |                 | #1 and 3 | 0.421 | 0.124-1.432 | 0.166 |
|           |                 |                 |                 |                 | #1 and 4 | 0.737 | 0.159-3.413 | 0.696 |
| MALAT1b10 | 0.75(0.52,1.01) | 0.74(0.55,0.84) | 0.67(0.45,0.97) | 0.72(0.55,1.03) | #2 and 3 | 1.031 | 0.288-3.690 | 0.963 |
|           |                 |                 |                 |                 | #2 and 4 | 1.803 | 0.357-9.110 | 0.476 |
|           |                 |                 |                 |                 | #3 and 4 | 1.749 | 0.356-8.594 | 0.491 |
|           |                 |                 |                 |                 | #1 and 2 | 1.177 | 0.338-4.094 | 0.798 |
|           |                 |                 |                 |                 | #1 and 3 | 1.677 | 0.519-5.421 | 0.388 |
| MALAT1b11 | 0.53(0.34,0.81) | 0.50(0.41,0.79) | 0.57(0.39,0.78) | 0.36(0.24,0.53) | #1 and 4 | 0.130 | 0.013-1.275 | 0.080 |
|           |                 |                 |                 |                 | #2 and 3 | 1.425 | 0.452-4.490 | 0.545 |
|           |                 |                 |                 |                 | #2 and 4 | 0.11  | 0.011-1.118 | 0.062 |

|           |                   |                    |                    |                 |          |       |              |              |
|-----------|-------------------|--------------------|--------------------|-----------------|----------|-------|--------------|--------------|
|           |                   |                    |                    |                 | #3 and 4 | 0.078 | 0.008-0.768  | <b>0.029</b> |
|           |                   |                    |                    |                 | #1 and 2 | 1.155 | 0.431-3.092  | 0.774        |
|           |                   |                    |                    |                 | #1 and 3 | 0.634 | 0.235-1.716  | 0.370        |
| MALAT1b12 | 1.42(1.07,1.83)   | 1.46(1.19,1.63)    | 1.39(1.13,1.62)    | 1.26(1.08,1.55) | #1 and 4 | 0.371 | 0.097-1.428  | 0.149        |
|           |                   |                    |                    |                 | #2 and 3 | 0.549 | 0.189-1.592  | 0.270        |
|           |                   |                    |                    |                 | #2 and 4 | 0.321 | 0.078-1.321  | 0.116        |
|           |                   |                    |                    |                 | #3 and 4 | 0.585 | 0.149-2.302  | 0.443        |
|           |                   |                    |                    |                 | #1 and 2 | 1.568 | 0.352-6.983  | 0.555        |
|           |                   |                    |                    |                 | #1 and 3 | 0.705 | 0.151-3.281  | 0.656        |
| MALAT1b13 | 0.52(0.35,0.69)   | 0.58(0.39,0.80)    | 0.57(0.32,0.72)    | 0.49(0.39,0.69) | #1 and 4 | 0.505 | 0.065-3.902  | 0.513        |
|           |                   |                    |                    |                 | #2 and 3 | 0.450 | 0.095-2.120  | 0.312        |
|           |                   |                    |                    |                 | #2 and 4 | 0.322 | 0.040-2.593  | 0.287        |
|           |                   |                    |                    |                 | #3 and 4 | 0.717 | 0.089-5.757  | 0.754        |
|           |                   |                    |                    |                 | #1 and 2 | 1.607 | 0.306-8.426  | 0.575        |
|           |                   |                    |                    |                 | #1 and 3 | 0.136 | 0.023-0.807  | <b>0.028</b> |
| MALAT1b14 | 0.71(0.51,0.85)   | 0.78(0.57,0.91)    | 0.60(0.49,0.78)    | 0.67(0.51,0.78) | #1 and 4 | 0.420 | 0.042-4.230  | 0.461        |
|           |                   |                    |                    |                 | #2 and 3 | 0.085 | 0.013-0.552  | <b>0.010</b> |
|           |                   |                    |                    |                 | #2 and 4 | 0.261 | 0.024-2.873  | 0.273        |
|           |                   |                    |                    |                 | #3 and 4 | 3.089 | 0.274-34.819 | 0.361        |
|           |                   |                    |                    |                 | #1 and 2 | 0.865 | 0.290-2.585  | 0.796        |
|           |                   |                    |                    |                 | #1 and 3 | 1.415 | 0.577-3.469  | 0.448        |
| MALAT1b15 | 0.68(0.53,0.86)   | 0.69(0.55,0.79)    | 0.73(0.50,0.89)    | 0.70(0.59,0.87) | #1 and 4 | 0.766 | 0.140-4.180  | 0.758        |
|           |                   |                    |                    |                 | #2 and 3 | 1.635 | 0.594-4.503  | 0.341        |
|           |                   |                    |                    |                 | #2 and 4 | 0.885 | 0.154-5.085  | 0.891        |
|           |                   |                    |                    |                 | #3 and 4 | 0.541 | 0.102-2.861  | 0.470        |
| MALAT1c1  | 69.31(65.35,71.5) | 69.35(66.88,71.21) | 69.19(64.80,71.64) | 68.54(66.39,71) | #1 and 2 | 1.078 | 0.970-1.197  | 0.163        |

|          |                    |                    |                    |                    |          |       |             |       |
|----------|--------------------|--------------------|--------------------|--------------------|----------|-------|-------------|-------|
|          |                    |                    |                    |                    | #1 and 3 | 1.023 | 0.924-1.134 | 0.657 |
|          |                    |                    |                    |                    | #1 and 4 | 1.006 | 0.876-1.154 | 0.936 |
|          |                    |                    |                    |                    | #2 and 3 | 0.950 | 0.850-1.061 | 0.359 |
|          |                    |                    |                    |                    | #2 and 4 | 0.933 | 0.807-1.079 | 0.350 |
|          |                    |                    |                    |                    | #3 and 4 | 0.983 | 0.852-1.133 | 0.809 |
|          |                    |                    |                    |                    | #1 and 2 | 1.037 | 0.942-1.141 | 0.462 |
|          |                    |                    |                    |                    | #1 and 3 | 1.013 | 0.920-1.115 | 0.800 |
|          |                    |                    |                    |                    | #1 and 4 | 0.955 | 0.840-1.086 | 0.483 |
| MALAT1c2 | 74.23(70.68,76.71) | 73.95(71.7,76.42)  | 74.59(70.75,76.7)  | 73.23(69.29,74.94) | #2 and 3 | 0.977 | 0.883-1.080 | 0.645 |
|          |                    |                    |                    |                    | #2 and 4 | 0.921 | 0.805-1.054 | 0.231 |
|          |                    |                    |                    |                    | #3 and 4 | 0.943 | 0.825-1.078 | 0.390 |
|          |                    |                    |                    |                    | #1 and 2 | 1.023 | 0.958-1.093 | 0.493 |
|          |                    |                    |                    |                    | #1 and 3 | 0.996 | 0.934-1.063 | 0.909 |
|          |                    |                    |                    |                    | #1 and 4 | 0.982 | 0.901-1.071 | 0.687 |
| MALAT1c3 | 67.32(62.75,70.93) | 67.18(63.85,70.49) | 68.18(61.24,70.96) | 66.28(60.63,69.5)  | #2 and 3 | 0.973 | 0.907-1.044 | 0.454 |
|          |                    |                    |                    |                    | #2 and 4 | 0.960 | 0.876-1.052 | 0.384 |
|          |                    |                    |                    |                    | #3 and 4 | 0.986 | 0.901-1.080 | 0.762 |
|          |                    |                    |                    |                    | #1 and 2 | 1.044 | 0.961-1.134 | 0.304 |
|          |                    |                    |                    |                    | #1 and 3 | 1.001 | 0.926-1.082 | 0.983 |
|          |                    |                    |                    |                    | #1 and 4 | 1.017 | 0.913-1.132 | 0.764 |
| MALAT1c4 | 70.04(66.34,72.44) | 69.49(66.88,72.33) | 70.22(65.59,71.63) | 69.16(65.45,70.87) | #2 and 3 | 0.958 | 0.878-1.046 | 0.343 |
|          |                    |                    |                    |                    | #2 and 4 | 0.973 | 0.867-1.093 | 0.649 |
|          |                    |                    |                    |                    | #3 and 4 | 1.016 | 0.908-1.137 | 0.785 |
| MALAT1c5 | 75.68(72.07,78.37) | 75.16(72.64,78.27) | 76.06(70.84,78.63) | 74.23(70.49,77.35) | #1 and 2 | 1.032 | 0.950-1.122 | 0.452 |

|          |                   |                    |                    |                    |          |       |             |       |
|----------|-------------------|--------------------|--------------------|--------------------|----------|-------|-------------|-------|
|          |                   |                    |                    |                    | #1 and 3 | 1.009 | 0.929-1.095 | 0.834 |
|          |                   |                    |                    |                    | #1 and 4 | 0.987 | 0.884-1.101 | 0.813 |
|          |                   |                    |                    |                    | #2 and 3 | 0.977 | 0.893-1.069 | 0.612 |
|          |                   |                    |                    |                    | #2 and 4 | 0.956 | 0.850-1.074 | 0.448 |
|          |                   |                    |                    |                    | #3 and 4 | 0.978 | 0.871-1.098 | 0.709 |
|          |                   |                    |                    |                    | #1 and 2 | 1.064 | 0.961-1.179 | 0.234 |
|          |                   |                    |                    |                    | #1 and 3 | 0.985 | 0.895-1.083 | 0.749 |
| MALAT1c6 | 80.07(77.33,82.4) | 79.63(77.83,83.33) | 80.23(75.62,82.32) | 79.09(76.65,82.19) | #1 and 4 | 1.002 | 0.879-1.142 | 0.977 |
|          |                   |                    |                    |                    | #2 and 3 | 0.925 | 0.830-1.031 | 0.159 |
|          |                   |                    |                    |                    | #2 and 4 | 0.941 | 0.817-1.084 | 0.401 |
|          |                   |                    |                    |                    | #3 and 4 | 1.018 | 0.888-1.166 | 0.801 |

\*Adjusted for age, gender, smoking and drinking. a: Methylation level is expressed as a percentage. Data was expressed as median (P<sub>25</sub>, P<sub>75</sub>). 1 = Upper third; 2 = Middle third; 3 = Lower third; 4 = Mixed type.

#1: 1 as reference; #2: 2 as reference; #3: 3 as reference.



**Table S11. Differences of methylation levels of H19, MALAT1 promoters in GC tumors from patients in different age groups\***

|                | Name         | Methylation level <sup>a</sup> |                    | Logistic regression analysis |              |              |
|----------------|--------------|--------------------------------|--------------------|------------------------------|--------------|--------------|
|                |              | ≤Mean <sup>b</sup>             | >Mean              | Odds Ratio                   | 95%CI        | P-value      |
| <b>Genes</b>   | H19          | 76.52(75.20,77.39)             | 76.69(75.98,77.48) | 1.170                        | 0.931-1.472  | 0.179        |
|                | MALAT1       | 8.85(8.65,9.05)                | 8.87(8.70,9.04)    | 1.105                        | 0.363-3.365  | 0.86         |
| <b>Regions</b> | H19A         | 46.61(45.60,47.93)             | 46.77(45.71,48.44) | 1.054                        | 0.923-1.204  | 0.434        |
|                | H19B         | 93.72(91.74,94.85)             | 92.81(91.59,94.52) | 0.956                        | 0.806-1.135  | 0.609        |
|                | H19C         | 95.78(95.47,96.12)             | 95.65(95.33,95.97) | 0.894                        | 0.516-1.549  | 0.689        |
|                | H19D         | 62.33(57.88,66.47)             | 63.97(61.08,67.15) | 1.046                        | 0.989-1.106  | 0.117        |
|                | MALAT1A      | 20.99(20.47,21.51)             | 21.04(20.60,21.53) | 1.007                        | 0.648-1.567  | 0.974        |
|                | MALAT1B      | 0.76(0.70,0.81)                | 0.74(0.69,0.79)    | 2.905                        | 0.127-66.471 | 0.504        |
|                | MALAT1C      | 71.90(67.70,73.68)             | 72.73(69.59,75.05) | 1.033                        | 0.964-1.106  | 0.355        |
|                | <b>Sites</b> | H19a1                          | 43.11(41.81,44.59) | 43.22(41.63,45.12)           | 1.041        | 0.921-1.177  |
| H19a2          |              | 44.63(42.98,45.58)             | 44.05(43.01,46.25) | 1.059                        | 0.969-1.156  | 0.205        |
| H19a3          |              | 45.66(44.67,46.96)             | 45.50(44.41,47.27) | 1.033                        | 0.910-1.174  | 0.612        |
| H19a4          |              | 45.19(43.86,46.23)             | 45.22(43.80,47.20) | 1.114                        | 0.977-1.271  | 0.108        |
| H19a5          |              | 45.33(44.24,46.69)             | 45.28(43.94,47.36) | 1.035                        | 0.916-1.170  | 0.58         |
| H19a6          |              | 45.71(44.75,47.04)             | 45.56(44.40,47.31) | 1.052                        | 0.926-1.195  | 0.437        |
| H19a7          |              | 45.83(44.58,47.18)             | 45.65(44.36,47.40) | 0.989                        | 0.918-1.067  | 0.781        |
| H19a8          |              | 46.45(45.23,47.87)             | 46.38(44.92,48.08) | 1.025                        | 0.901-1.165  | 0.71         |
| H19a9          |              | 47.29(46.07,48.66)             | 47.21(46.15,48.64) | 1.050                        | 0.915-1.204  | 0.487        |
| H19a10         |              | 47.28(46.43,48.59)             | 47.34(46.04,48.82) | 1.044                        | 0.910-1.197  | 0.538        |
| H19a11         |              | 47.49(46.50,48.59)             | 47.49(46.05,48.91) | 1.040                        | 0.909-1.190  | 0.566        |
| H19a12         |              | 47.11(45.99,48.39)             | 47.36(45.69,48.96) | 1.005                        | 0.902-1.120  | 0.924        |
| H19a13         |              | 48.42(47.43,49.88)             | 48.84(47.44,50.28) | 1.058                        | 0.931-1.201  | 0.389        |
| H19a14         |              | 49.09(48.17,50.32)             | 49.12(47.83,51.09) | 1.024                        | 0.909-1.154  | 0.693        |
| H19a15         |              | 49.01(47.86,50.48)             | 49.19(48.19,50.94) | 1.061                        | 0.928-1.212  | 0.386        |
| H19a16         |              | 48.85(48.11,50.55)             | 49.25(47.78,51.27) | 1.059                        | 0.929-1.207  | 0.39         |
| H19b1          |              | 86.09(45.86,89.57)             | 52.35(47.89,88.55) | 0.999                        | 0.987-1.011  | 0.889        |
| H19b2          |              | 97.54(97.10,97.95)             | 97.30(96.88,97.71) | 0.496                        | 0.284-0.865  | <b>0.013</b> |
| H19b3          |              | 96.26(95.84,96.80)             | 96.26(95.79,96.82) | 0.903                        | 0.573-1.423  | 0.659        |
| H19b4          |              | 89.09(88.32,90.23)             | 89.24(87.47,90.62) | 0.996                        | 0.937-1.058  | 0.892        |
| H19b5          |              | 93.70(93.12,94.31)             | 93.62(92.56,94.30) | 0.818                        | 0.607-1.103  | 0.187        |
| H19b6          |              | 97.96(97.62,98.27)             | 97.98(97.61,98.32) | 1.000                        | 0.530-1.889  | 0.999        |
| H19b7          |              | 92.63(91.70,93.41)             | 92.29(90.95,93.23) | 0.757                        | 0.593-0.966  | <b>0.025</b> |
| H19b8          |              | 96.18(95.78,96.60)             | 96.25(95.73,96.79) | 0.979                        | 0.697-1.377  | 0.904        |
| H19b9          |              | 94.67(93.93,95.47)             | 94.46(93.53,95.59) | 0.856                        | 0.679-1.079  | 0.187        |
| H19b10         |              | 97.38(96.98,97.75)             | 97.39(96.93,97.80) | 0.881                        | 0.544-1.427  | 0.605        |
| H19b11         |              | 90.71(90.03,91.46)             | 90.64(89.38,91.57) | 1.016                        | 0.829-1.246  | 0.879        |
| H19b12         |              | 97.17(96.63,97.57)             | 97.03(96.55,97.38) | 0.814                        | 0.511-1.298  | 0.388        |
| H19b13         |              | 96.68(96.27,97.15)             | 96.79(96.24,97.21) | 1.085                        | 0.688-1.712  | 0.726        |
| H19b14         |              | 95.35(94.85,95.92)             | 95.25(94.4,95.89)  | 0.830                        | 0.622-1.108  | 0.205        |

|           |                    |                    |       |             |              |
|-----------|--------------------|--------------------|-------|-------------|--------------|
| H19b15    | 97.71(97.29,98.00) | 97.72(97.11,98.11) | 1.288 | 0.728-2.279 | 0.385        |
| H19c1     | 93.65(92.71,94.50) | 93.78(92.84,94.83) | 1.054 | 0.854-1.301 | 0.625        |
| H19c2     | 86.98(84.78,88.81) | 86.51(84.97,88.66) | 1.000 | 0.89-1.124) | 0.999        |
| H19c3     | 95.96(95.23,96.69) | 95.73(94.58,96.51) | 0.837 | 0.653-1.072 | 0.159        |
| H19c4     | 95.74(95.08,96.42) | 95.51(94.45,96.45) | 0.842 | 0.657-1.079 | 0.174        |
| H19c5     | 96.37(95.56,97.00) | 96.34(95.55,96.83) | 0.925 | 0.686-1.247 | 0.608        |
| H19c6     | 96.98(96.12,97.73) | 97.02(96.49,97.64) | 1.090 | 0.825-1.441 | 0.543        |
| H19c7     | 98.06(97.31,98.40) | 97.91(97.41,98.37) | 1.000 | 0.699-1.430 | 0.998        |
| H19c8     | 97.10(96.55,97.83) | 96.89(96.40,97.63) | 0.891 | 0.693-1.146 | 0.37         |
| H19c9     | 93.70(92.80,94.47) | 93.43(92.40,94.24) | 0.999 | 0.944-1.056 | 0.965        |
| H19c10    | 96.79(96.23,97.57) | 96.81(96.09,97.38) | 0.999 | 0.944-1.056 | 0.965        |
| H19c11    | 89.76(88.11,91.34) | 89.42(87.59,91.13) | 0.944 | 0.820-1.087 | 0.424        |
| H19c12    | 97.51(97.10,98.19) | 97.49(97.08,97.96) | 0.803 | 0.556-1.160 | 0.242        |
| H19c13    | 97.99(97.53,98.60) | 98.01(97.54,98.55) | 0.803 | 0.556-1.160 | 0.242        |
| H19c14    | 98.44(97.98,98.89) | 98.36(98.01,98.77) | 1.039 | 0.716-1.508 | 0.839        |
| H19c15    | 98.03(97.72,98.44) | 98.31(97.78,98.70) | 1.934 | 1.163-3.216 | <b>0.011</b> |
| H19c16    | 97.75(97.13,98.07) | 97.55(97.08,97.98) | 0.818 | 0.571-1.171 | 0.272        |
| H19c17    | 97.63(97.16,98.11) | 97.70(97.40,98.08) | 1.162 | 0.791-1.708 | 0.444        |
| H19c18    | 94.72(94.00,95.68) | 95.15(94.29,95.77) | 1.221 | 0.948-1.572 | 0.122        |
| H19c19    | 97.18(96.59,97.61) | 97.26(96.76,97.56) | 1.173 | 0.804-1.710 | 0.408        |
| H19d1     | 51.85(45.95,56.34) | 54.63(49.69,57.84) | 1.046 | 1.002-1.091 | <b>0.038</b> |
| H19d2     | 51.77(47.78,56.81) | 52.59(49.55,58.33) | 1.017 | 0.977-1.060 | 0.41         |
| H19d3     | 51.75(48.18,56.12) | 53.00(49.57,57.45) | 1.037 | 0.989-1.086 | 0.135        |
| H19d4     | 52.11(47.42,55.62) | 52.69(50.60,56.67) | 1.035 | 0.989-1.082 | 0.137        |
| H19d5     | 52.53(48.28,57.83) | 54.69(50.89,58.33) | 1.036 | 0.990-1.085 | 0.13         |
| H19d6     | 82.35(76.79,87.30) | 82.98(79.52,86.44) | 1.024 | 0.972-1.078 | 0.375        |
| H19d7     | 72.62(67.74,79.25) | 73.63(71.16,79.66) | 1.007 | 0.969-1.047 | 0.71         |
| H19d8     | 69.63(63.16,77.42) | 70.66(66.67,76.84) | 1.025 | 0.985-1.066 | 0.226        |
| H19d9     | 75.92(70.69,82.42) | 76.85(72.26,82.63) | 1.015 | 0.972-1.059 | 0.509        |
| H19d10    | 60.78(54.84,65.88) | 63.16(56.82,68.29) | 1.041 | 0.997-1.086 | 0.067        |
| MALAT1a1  | 32.96(31.55,34.26) | 33.29(32.00,34.53) | 0.983 | 0.835-1.157 | 0.838        |
| MALAT1a2  | 25.96(24.87,27.49) | 26.13(24.91,27.37) | 1.020 | 0.867-1.200 | 0.812        |
| MALAT1a3  | 20.31(18.95,21.81) | 20.13(18.77,20.6)  | 0.851 | 0.713-1.016 | 0.074        |
| MALAT1a4  | 12.37(11.58,13.17) | 12.23(11.47,13.76) | 1.012 | 0.816-1.255 | 0.916        |
| MALAT1a5  | 4.97(4.48,5.40)    | 4.94(4.33,5.61)    | 0.949 | 0.663-1.359 | 0.776        |
| MALAT1a6  | 19.36(18.62,20.71) | 20.11(18.98,21.30) | 1.182 | 0.981-1.424 | 0.079        |
| MALAT1a7  | 25.61(24.51,26.48) | 25.81(24.76,27.12) | 1.125 | 0.937-1.351 | 0.206        |
| MALAT1a8  | 21.69(20.35,22.74) | 21.43(20.33,22.37) | 0.915 | 0.762-1.100 | 0.344        |
| MALAT1a9  | 19.80(18.82,20.51) | 20.03(18.74,21.07) | 1.056 | 0.880-1.267 | 0.559        |
| MALAT1a10 | 26.56(25.00,27.68) | 26.43(25.19,27.79) | 0.958 | 0.821-1.118 | 0.583        |
| MALAT1b1  | 0.60(0.44,0.80)    | 0.66(0.50,0.90)    | 1.412 | 0.471-4.230 | 0.538        |
| MALAT1b2  | 0.52(0.40,0.65)    | 0.56(0.41,0.78)    | 2.912 | 0.860-9.858 | 0.086        |
| MALAT1b3  | 0.73(0.55,0.89)    | 0.73(0.52,0.92)    | 0.800 | 0.305-2.098 | 0.65         |
| MALAT1b4  | 0.67(0.50,0.90)    | 0.71(0.48,0.96)    | 1.647 | 0.776-3.496 | 0.194        |

|           |                    |                    |       |             |              |
|-----------|--------------------|--------------------|-------|-------------|--------------|
| MALAT1b5  | 0.67(0.52,0.86)    | 0.71(0.55,0.88)    | 1.346 | 0.414-4.373 | 0.621        |
| MALAT1b6  | 0.71(0.49,0.90)    | 0.73(0.52,0.93)    | 1.978 | 0.781-5.005 | 0.15         |
| MALAT1b7  | 0.73(0.62,0.92)    | 0.70(0.55,0.91)    | 0.804 | 0.329-1.967 | 0.633        |
| MALAT1b8  | 0.77(0.63,0.99)    | 0.82(0.58,1.03)    | 1.112 | 0.392-3.151 | 0.842        |
| MALAT1b9  | 0.77(0.48,0.93)    | 0.75(0.55,0.90)    | 1.018 | 0.386-2.680 | 0.972        |
| MALAT1b10 | 0.73(0.47,1.04)    | 0.73(0.53,0.89)    | 0.874 | 0.353-2.163 | 0.771        |
| MALAT1b11 | 0.54(0.39,0.77)    | 0.50(0.35,0.75)    | 0.924 | 0.374-2.283 | 0.864        |
| MALAT1b12 | 1.40(1.21,1.65)    | 1.41(1.05,1.65)    | 0.940 | 0.448-1.970 | 0.869        |
| MALAT1b13 | 0.63(0.40,0.78)    | 0.49(0.30,0.67)    | 0.261 | 0.079-0.866 | <b>0.028</b> |
| MALAT1b14 | 0.72(0.57,0.87)    | 0.67(0.46,0.81)    | 0.418 | 0.117-1.488 | 0.178        |
| MALAT1b15 | 0.71(0.55,0.91)    | 0.69(0.53,0.82)    | 1.255 | 0.604-2.605 | 0.542        |
| MALAT1c1  | 68.63(66.16,70.68) | 69.90(65.39,71.73) | 1.255 | 0.604-2.605 | 0.542        |
| MALAT1c2  | 73.16(70.00,75.76) | 74.77(71.24,77.24) | 1.052 | 0.977-1.133 | 0.181        |
| MALAT1c3  | 66.45(60.57,69.54) | 68.00(62.84,72.03) | 1.027 | 0.976-1.080 | 0.304        |
| MALAT1c4  | 69.05(65.10,71.43) | 70.10(67.20,72.73) | 1.040 | 0.977-1.107 | 0.219        |
| MALAT1c5  | 75.06(71.88,77.39) | 75.99(72.14,79.03) | 1.022 | 0.959-1.088 | 0.507        |
| MALAT1c6  | 79.41(76.92,82.14) | 80.16(77.31,83.07) | 1.024 | 0.950-1.103 | 0.541        |

\*Adjusted for gender, smoking and drinking. a: Methylation level is expressed as a percentage.

**Table S12. Differences of methylation levels of H19, MALAT1 promoters in GC tumors with different HER-2 status\***

|                | Name               | Methylation level <sup>a</sup> |                    | Logistic regression analysis |               |         |
|----------------|--------------------|--------------------------------|--------------------|------------------------------|---------------|---------|
|                |                    | Negative                       | Positive           | Odds Ratio                   | 95%CI         | P-value |
| <b>Genes</b>   | H19                | 76.75(75.01,78.02)             | 77.59(76.88,78.06) | 1.039                        | 0.643-1.679   | 0.875   |
|                | MALAT1             | 8.84(8.65,8.99)                | 8.78(8.54,8.96)    | 0.378                        | 0.008-17.454  | 0.619   |
| <b>Regions</b> | H19A               | 47.07(45.00,48.39)             | 46.85(46.61,48.09) | 1.520                        | 0.863-2.676   | 0.147   |
|                | H19B               | 92.87(91.16,94.63)             | 92.94(91.84,94.73) | 0.653                        | 0.362-1.175   | 0.155   |
|                | H19C               | 95.66(95.18,96.16)             | 95.72(95.22,96.03) | 0.305                        | 0.045-2.072   | 0.225   |
|                | H19D               | 62.69(60.33,66.87)             | 68.64(63.01,69.66) | 1.020                        | 0.910-1.143   | 0.735   |
|                | MALAT1A            | 20.94(20.45,21.38)             | 20.75(20.33,21.08) | 0.691                        | 0.154-3.111   | 0.630   |
|                | MALAT1B            | 0.76(0.70,0.82)                | 0.75(0.66,0.80)    | 0.926                        | 0.001-1337.82 | 0.983   |
|                | MALAT1C            | 72.32(68.06,74.09)             | 69.29(63.52,71.99) | 0.946                        | 0.765-1.170   | 0.609   |
|                | H19a1              | 43.83(41.26,45.32)             | 43.71(43.02,44.85) | 1.329                        | 0.833-2.120   | 0.232   |
|                | H19a2              | 44.81(42.67,46.53)             | 44.71(43.90,45.62) | 1.251                        | 0.809-1.935   | 0.314   |
|                | H19a3              | 46.79(43.76,47.63)             | 45.95(45.53,47.52) | 1.374                        | 0.858-2.200   | 0.186   |
|                | H19a4              | 45.54(43.38,47.44)             | 46.16(45.48,47.45) | 1.559                        | 0.920-2.643   | 0.099   |
|                | H19a5              | 45.84(43.19,47.38)             | 45.43(45.00,46.94) | 1.367                        | 0.821-2.277   | 0.230   |
|                | H19a6              | 46.27(43.89,47.66)             | 45.86(45.63,48.03) | 1.487                        | 0.903-2.450   | 0.119   |
|                | H19a7              | 45.97(43.99,47.89)             | 46.20(45.68,47.39) | 1.510                        | 0.882-2.584   | 0.133   |
|                | H19a8              | 46.95(44.36,48.21)             | 46.54(45.37,48.00) | 1.403                        | 0.842-2.339   | 0.193   |
|                | H19a9              | 47.64(45.94,49.44)             | 47.42(46.58,48.55) | 1.357                        | 0.811-2.272   | 0.245   |
|                | H19a10             | 47.27(45.85,49.17)             | 47.60(47.41,48.81) | 1.634                        | 0.880-3.032   | 0.120   |
|                | H19a11             | 47.60(45.87,49.14)             | 47.49(47.36,48.43) | 1.512                        | 0.857-2.668   | 0.153   |
|                | H19a12             | 47.79(45.38,48.83)             | 47.75(47.14,48.75) | 1.917                        | 0.870-4.221   | 0.106   |
| H19a13         | 49.35(47.22,50.68) | 49.03(48.34,50.23)             | 1.432              | 0.862-2.381                  | 0.166         |         |
| H19a14         | 49.78(47.21,50.96) | 49.50(48.78,49.86)             | 1.311              | 0.834-2.060                  | 0.241         |         |
| H19a15         | 49.53(47.67,51.31) | 49.33(48.91,50.12)             | 1.457              | 0.847-2.507                  | 0.174         |         |
| <b>Sites</b>   | H19a16             | 49.62(47.81,51.48)             | 49.08(48.42,50.29) | 1.451                        | 0.842-2.500   | 0.181   |
|                | H19b1              | 52.48(44.55,89.76)             | 52.35(47.56,88.73) | 0.972                        | 0.935-1.010   | 0.141   |
|                | H19b2              | 97.50(97.09,97.97)             | 98.00(97.36,98.33) | 6.069                        | 0.657-56.101  | 0.112   |
|                | H19b3              | 96.37(96.02,96.74)             | 96.31(95.97,96.73) | 0.591                        | 0.085-4.086   | 0.594   |
|                | H19b4              | 89.22(88.20,91.19)             | 89.29(88.69,90.85) | 1.300                        | 0.742-2.277   | 0.358   |
|                | H19b5              | 93.81(93.11,94.48)             | 93.62(92.73,94.13) | 1.109                        | 0.418-2.938   | 0.836   |
|                | H19b6              | 98.03(97.69,98.35)             | 97.95(97.78,98.16) | 0.985                        | 0.044-22.111  | 0.992   |
|                | H19b7              | 92.88(91.13,93.46)             | 91.70(90.93,92.96) | 1.239                        | 0.543-2.827   | 0.610   |
|                | H19b8              | 96.15(95.74,96.54)             | 96.34(96.18,96.76) | 2.260                        | 0.329-15.508  | 0.407   |
|                | H19b9              | 94.58(94.05,95.48)             | 94.60(93.52,95.76) | 1.783                        | 0.836-3.799   | 0.134   |
|                | H19b10             | 97.53(96.85,98.04)             | 97.15(96.33,97.63) | 0.009                        | 0.000-1.106   | 0.055   |
|                | H19b11             | 90.57(90.39,91.11)             | 90.64(89.82,91.67) | 0.911                        | 0.480-1.732   | 0.777   |
|                | H19b12             | 97.09(96.56,97.44)             | 97.03(96.65,97.66) | 0.874                        | 0.177-4.302   | 0.868   |
|                | H19b13             | 96.77(95.92,97.20)             | 96.39(96.20,96.87) | 0.772                        | 0.187-3.178   | 0.719   |
| H19b14         | 95.38(94.84,95.99) | 95.22(94.68,96.31)             | 1.116              | 0.403-3.091                  | 0.833         |         |

|           |                    |                    |       |              |       |
|-----------|--------------------|--------------------|-------|--------------|-------|
| H19b15    | 97.64(97.32,98.00) | 97.65(97.06,97.92) | 1.841 | 0.199-17.075 | 0.591 |
| H19c1     | 94.25(91.85,94.96) | 93.81(91.19,94.59) | 0.631 | 0.316-1.258  | 0.190 |
| H19c2     | 87.34(84.46,88.95) | 85.78(84.88,88.96) | 0.881 | 0.619-1.255  | 0.484 |
| H19c3     | 96.03(94.37,96.78) | 95.72(95.04,96.13) | 0.834 | 0.446-1.562  | 0.571 |
| H19c4     | 95.43(94.89,96.31) | 95.08(94.05,95.54) | 0.847 | 0.521-1.377  | 0.502 |
| H19c5     | 96.32(95.53,97.14) | 96.28(95.73,97.06) | 0.735 | 0.339-1.593  | 0.436 |
| H19c6     | 97.32(95.91,97.73) | 96.63(96.03,98.37) | 1.329 | 0.716-2.468  | 0.368 |
| H19c7     | 98.05(96.98,98.50) | 97.86(97.42,98.04) | 0.420 | 0.107-1.652  | 0.214 |
| H19c8     | 97.46(96.58,97.92) | 97.34(96.85,98.23) | 0.757 | 0.284-2.017  | 0.577 |
| H19c9     | 93.52(92.50,94.38) | 92.84(91.37,94.58) | 0.922 | 0.594-1.431  | 0.718 |
| H19c10    | 96.82(96.23,97.24) | 96.81(96.10,97.41) | 1.107 | 0.541-2.265  | 0.781 |
| H19c11    | 89.31(87.36,91.63) | 89.47(85.82,90.76) | 0.699 | 0.430-1.135  | 0.147 |
| H19c12    | 97.41(96.87,97.91) | 98.20(97.26,98.73) | 3.947 | 0.707-22.031 | 0.118 |
| H19c13    | 97.83(97.34,98.63) | 97.99(97.47,98.43) | 0.463 | 0.139-1.537  | 0.208 |
| H19c14    | 98.55(97.88,98.93) | 98.40(98.07,99.25) | 1.550 | 0.358-6.717  | 0.558 |
| H19c15    | 97.99(97.71,98.45) | 98.16(97.74,98.65) | 0.641 | 0.179-2.298  | 0.495 |
| H19c16    | 97.78(97.10,98.28) | 97.60(97.11,97.81) | 0.310 | 0.066-1.446  | 0.136 |
| H19c17    | 97.93(97.45,98.43) | 97.62(97.00,98.18) | 0.730 | 0.272-1.959  | 0.532 |
| H19c18    | 94.43(93.56,95.63) | 94.87(94.20,95.51) | 1.352 | 0.670-2.729  | 0.399 |
| H19c19    | 97.05(96.60,97.43) | 97.14(96.48,97.74) | 1.482 | 0.431-5.099  | 0.533 |
| H19d1     | 53.75(49.55,58.23) | 57.14(53.00,58.85) | 1.070 | 0.886-1.294  | 0.481 |
| H19d2     | 52.28(48.27,56.94) | 55.07(50.09,57.84) | 0.963 | 0.878-1.057  | 0.430 |
| H19d3     | 51.17(49.42,57.69) | 53.66(53.00,59.47) | 1.001 | 0.909-1.103  | 0.978 |
| H19d4     | 52.34(49.26,56.77) | 52.28(50.30,55.17) | 0.967 | 0.861-1.086  | 0.570 |
| H19d5     | 53.64(49.38,58.36) | 53.72(50.68,59.50) | 0.991 | 0.899-1.092  | 0.850 |
| H19d6     | 82.08(77.20,85.42) | 85.71(80.67,91.23) | 1.102 | 0.966-1.258  | 0.148 |
| H19d7     | 73.51(69.32,79.75) | 78.13(73.55,83.81) | 1.021 | 0.948-1.099  | 0.588 |
| H19d8     | 70.71(63.12,74.69) | 80.28(70.66,82.15) | 1.086 | 0.958-1.232  | 0.197 |
| H19d9     | 76.38(72.12,83.58) | 80.00(73.43,87.86) | 1.060 | 0.946-1.188  | 0.317 |
| H19d10    | 61.00(55.97,64.31) | 65.88(61.88,75.00) | 1.010 | 0.940-1.085  | 0.789 |
| MALAT1a1  | 32.68(31.59,33.97) | 33.12(30.49,33.96) | 1.034 | 0.579-1.846  | 0.911 |
| MALAT1a2  | 26.02(25.17,27.11) | 26.91(25.40,28.95) | 1.256 | 0.642-2.458  | 0.506 |
| MALAT1a3  | 19.09(17.87,21.10) | 18.32(17.08,20.02) | 1.039 | 0.531-2.033  | 0.912 |
| MALAT1a4  | 12.31(11.67,12.99) | 12.42(10.24,13.71) | 0.878 | 0.479-1.608  | 0.673 |
| MALAT1a5  | 4.87(4.38,5.28)    | 4.85(4.48,5.18)    | 1.270 | 0.366-4.411  | 0.706 |
| MALAT1a6  | 19.66(18.66,21.24) | 18.84(18.04,21.03) | 0.815 | 0.422-1.577  | 0.544 |
| MALAT1a7  | 25.37(23.88,26.46) | 25.34(24.56,26.11) | 0.613 | 0.255-1.477  | 0.276 |
| MALAT1a8  | 21.33(20.31,22.85) | 21.57(21.23,23.56) | 0.987 | 0.631-1.543  | 0.954 |
| MALAT1a9  | 20.26(19.30,20.98) | 19.90(17.75,21.52) | 0.750 | 0.413-1.359  | 0.342 |
| MALAT1a10 | 26.05(24.18,27.67) | 25.95(25.32,27.29) | 0.985 | 0.661-1.466  | 0.939 |
| MALAT1b1  | 0.62(0.42,0.92)    | 0.66(0.27,0.99)    | 1.036 | 0.048-22.493 | 0.982 |
| MALAT1b2  | 0.51(0.37,0.66)    | 0.52(0.35,0.78)    | 0.846 | 0.024-30.371 | 0.927 |
| MALAT1b3  | 0.72(0.57,0.93)    | 0.54(0.29,0.82)    | 0.023 | 0.000-2.406  | 0.112 |
| MALAT1b4  | 0.66(0.43,0.90)    | 0.61(0.43,1.18)    | 2.739 | 0.142-52.960 | 0.505 |

|           |                    |                    |       |               |       |
|-----------|--------------------|--------------------|-------|---------------|-------|
| MALAT1b5  | 0.67(0.48,0.82)    | 0.55(0.31,0.75)    | 0.002 | 0.000-2.486   | 0.086 |
| MALAT1b6  | 0.72(0.51,0.98)    | 0.75(0.71,0.88)    | 1.361 | 0.172-10.759  | 0.770 |
| MALAT1b7  | 0.75(0.66,0.98)    | 0.77(0.46,0.87)    | 1.037 | 0.056-19.060  | 0.980 |
| MALAT1b8  | 0.72(0.63,1.04)    | 0.87(0.62,1.31)    | 1.693 | 0.109-26.300  | 0.707 |
| MALAT1b9  | 0.82(0.60,0.94)    | 0.87(0.66,1.21)    | 4.388 | 0.177-109.022 | 0.367 |
| MALAT1b10 | 0.74(0.52,1.03)    | 0.73(0.32,0.82)    | 0.289 | 0.017-4.814   | 0.387 |
| MALAT1b11 | 0.50(0.35,0.69)    | 0.58(0.30,0.83)    | 3.272 | 0.209-51.305  | 0.399 |
| MALAT1b12 | 1.39(0.90,1.59)    | 1.40(1.17,1.61)    | 0.201 | 0.007-5.454   | 0.341 |
| MALAT1b13 | 0.51(0.30,0.81)    | 0.40(0.17,0.57)    | 0.113 | 0.005-2.448   | 0.165 |
| MALAT1b14 | 0.72(0.59,0.85)    | 0.58(0.43,0.78)    | 0.182 | 0.003-13.261  | 0.436 |
| MALAT1b15 | 0.76(0.58,0.87)    | 0.76(0.48,1.03)    | 1.444 | 0.400-5.203   | 0.575 |
| MALAT1c1  | 69.01(65.90,70.99) | 66.16(64.46,69.65) | 1.018 | 0.788-1.316   | 0.89  |
| MALAT1c2  | 74.07(70.92,75.87) | 70.24(69.25,73.25) | 1.021 | 0.802-1.300   | 0.867 |
| MALAT1c3  | 67.44(62.29,70.42) | 63.04(55.79,66.10) | 0.976 | 0.850-1.122   | 0.734 |
| MALAT1c4  | 70.17(66.31,72.23) | 68.11(62.19,69.78) | 0.863 | 0.691-1.079   | 0.197 |
| MALAT1c5  | 75.81(71.99,78.12) | 72.14(67.00,74.43) | 0.906 | 0.744-1.104   | 0.329 |
| MALAT1c6  | 79.98(76.83,82.50) | 77.09(73.97,80.79) | 0.967 | 0.777-1.203   | 0.762 |

\*Adjusted for age, gender, smoking and drinking. a: Methylation level is expressed as a percentage. Data was expressed as median (P<sub>25</sub>, P<sub>75</sub>).

**Table S13. Sensitivity, Specificity, and area under the curve of the the diagnosis model of H19 and MALAT1 promoters in peripheral blood between GC patients and controls in Female and Male groups**

|        | <b>Model</b> | <b>AUC(95%CI)</b>  | <b>Sensitivity(%)</b> | <b>Specificity(%)</b> | <b>P-value</b>        |
|--------|--------------|--------------------|-----------------------|-----------------------|-----------------------|
| Female | Nomogram     | 0.821(0.716-0.926) | 69.4                  | 92.6                  | 1.50×10 <sup>-5</sup> |
|        | MALAT1b12    | 0.722(0.593-0.851) | 61.1                  | 81.5                  | 0.003                 |
|        | H19c3        | 0.686(0.552-0.821) | 75.0                  | 59.3                  | 0.012                 |
|        | H19c4        | 0.677(0.544-0.810) | 52.8                  | 77.8                  | 0.017                 |
| Male   | Nomogram     | 0.741(0.669-0.813) | 65.8                  | 75.3                  | 2.90×10 <sup>-8</sup> |
|        | H19b7        | 0.664(0.585-0.742) | 65.8                  | 75.3                  | 1.63×10 <sup>-4</sup> |
|        | H19c1        | 0.688(0.612-0.764) | 48.2                  | 82.2                  | 1.50×10 <sup>-6</sup> |
|        | H19c5        | 0.665(0.587-0.743) | 50.9                  | 82.2                  | 1.40×10 <sup>-5</sup> |

AUC, area under curve.
